# Supplementary material for: Catalytic Asymmetric Spiroannulation to Access Polycyclic Spiro Enones via Transient Axial-to-Point Chirality Induction and Transfer
Source: Research Square preprint supplement (doi:10.21203/rs.3.rs-8609924/v1), 2026-01-30
Supplement: Supplementary file 1 [file 060e5f3724339d1017b9554f.docx]

**Supplementary information**

**Catalytic Asymmetric Spiroannulation to Access Polycyclic Spiro Enones via Transient Axial-to-Point Chirality Induction and Transfer**

Qian Wang1, Pei-Chao Zhang2*, Mei-Hua Huang1, Wen-Wen Zhang2, Yu Liu1* & Junliang Zhang3*

1College of Chemistry and Life Science, Advanced Institute of Materials Science, Changchun University of Technology, Changchun 130012, P. R. China

2The Center for Basic Research and Innovation of Medicine and Pharmacy (MOE), School of Pharmacy, Second Military Medical University (Naval Medical University), Shanghai 200433, P. R. China

3Department of Chemistry, Fudan University, 2005 Songhu Road, Shanghai 200438, P. R. China

E-mail: pczhang@smmu.edu.cn; yuliu@ccut.edu.cn; junliangzhang@fudan.edu.cn

**Contents**

[1. Optimization of reaction conditions 3](#_Toc199311019)

[2. Nonlinear effects experiment 4](#_Toc199311022)

[3. Sensitivity assessment of the reaction between **1a** and **2a** 5](#_Toc199311023)

[4. The effect of **3** on pro-inflammatory cytokine secretion in vitro. 6](#_Toc199311024)

[5. Synthesis of the **PC-Phos** 8](#_Toc199311025)

[6. Sythesis of the substrates 10](#_Toc199311026)

[7. General procedure for dearomative spiroannulation of racemic phenolic biaryls with 1,3-cyclohexadienes. 12](#_Toc199311029)

[8. Gram-scale synthesis. 44](#_Toc199311030)

[9. Synthetic applications of the products. 44](#_Toc199311031)

[10. NMR spectra 48](#_Toc199311032)

[11. References. 99](#_Toc199311033)

**General Information:**

Unless otherwise noted, all reactions were carried out in standard Schlenk techniques with magnetic stirring bar under air. Materials obtained from commercial suppliers were used directly without further purification. **1H NMR** spectra were recorded in CDCl3 with Bruker spectrometers at 400 (100 MHz) or 500 (125 MHz). Chemical shifts are reported in ppm with tetramethylsilane (TMS: 0 ppm) with the solvent resonance as the internal standard. Data are reported as follows: chemical shift, multiplicity (s = singlet, d = doublet, t = triplet, q = quartet, m = multiplet), coupling constants (Hz), and integration. **13C NMR** spectra were recorded on Bruker 400 (100 MHz) and 500 (125 MHz) spectrometers in CDCl3 with complete proton decoupling. Chemical shifts are reported in ppm with the deuterium solvent as the internal standard (CDCl3: 77.0 ppm). The [*α*]D were measured on a PolAAr 3005 High Accuracy Polarimeter. The *ee* was recorded using LC-2030C 3D from Shimadzu Company. Flash column chromatography was performed over silica gel (10-40 mesh).

The starting materials PC-Phos,1 1-naphthol **1**2 and cyclic 1,3-dienes **2**3, 4 were synthesized according to published procedures. The spectral data of the substrates were consisted with that reported in the literature. The enantionmeric excesses of the products were determined by chiral stationary phase HPLC using Chiralpak IA, IB, ID, IF columns.

**Note:** The prepared cyclic 1,3-dienes should be stored at low temperature and protected from light, and used as soon as possible. If the storage time of cyclic 1,3-diene is too long, it should be purified by flash column chromatography on silica gel to remove excess water and impurities before use.

1. Optimization of reaction conditions.

**Fig S1. Optimization of chiral ligands.**

**Fig. S1**. *a* Unless otherwise noted, all reactions were carried out with 0.1 mmol of **1a**, 0.3 mmol of **2a**, and 5 mol% of Pd2(dba)3, L* (20 mol%) (Pd: L* = 1: 2) in 0.5 mL Mestiylene at 60 oC for 96 h; yield and conversion were determined by GC, *e.e*. were determined by HPLC analysis. *b* ND = Not detected.

**1.2 Evaluation of reaction parameters.*a***

| Entry | Variation From“Standard Conditions” | Ee% | Yield% |
| --- | --- | --- | --- |
| 1 | None | 94 | 77(65b) |
| 2 | Pd(dppf)Cl2 instead of Pd2(dba)3 | 66 | 48 |
| 3 | Pd(Xantphos)Cl2 instead of Pd2(dba)3 | 82 | 20 |
| 4 | [Pd(π-allylPh)Cl]2 instead of Pd2(dba)3 | 93 | 63 |
| 5 | Pd(OPiv)2 instead of Pd2(dba)3 | 85 | 43 |
| 6 | Pd(COD)Cl2 instead of Pd2(dba)3 | 94 | 70 |
| 7 | Pd(TFA)2 instead of Pd2(dba)3 | 92 | 73 |
| 8 | DCM instead of Mestiylene | 80 | 57 |
| 9 | PhCl instead of Mestiylene | 89 | 49 |
| 10 | PhMe instead of Mestiylene | 93 | 63 |
| 11 | MeCN instead of Mestiylene | - | Trace |
| 12 | 1,4-Dioxane instead of Mestiylene | - | ND*c* |
| 13 | 5 mol% Pd2(dba)3 and 10 mol% L* | 92 | 59 |
| 14 | 12 mol% L* | 94 | 64 |
| 15 | no L* | - | Trace |
| 16 | no K2HPO4 | - | ND*c* |

**Fig S2**.Unless otherwise noted, all reactions were carried out with 0.1 mmol of **1a**, 0.3 mmol of **2a**, and 5 mol% of Pd2(dba)3, L* (20 mol%) (Pd: L* = 1: 2) in 0.5 mL Mestiylene at 60 oC for 96 h; yield and conversion were determined by GC, *e.e*. were determined by HPLC analysis. *b* Isolate yield; *c* ND = Not detected.

1. Nonlinear effects experiment.

Non-linear effect reactions were set up with standard substrates (0.1 mmol), catalyst and *N*-H-**PC10** with varied *ee* following the standard procedure as described in previous section. In this case, the amount of palladium precatalyst and *N*-H-**PC10** enantiomers was weighed on an analytical balance, and the amount of solvent was measured with volumetric syringe. The reactions were allowed to run for 96 h, purification as described in standard procedure. Each experiment was repeated one time. The relationship between enantiomeric excess of *N*-H-**PC10** ligand and product is listed here.


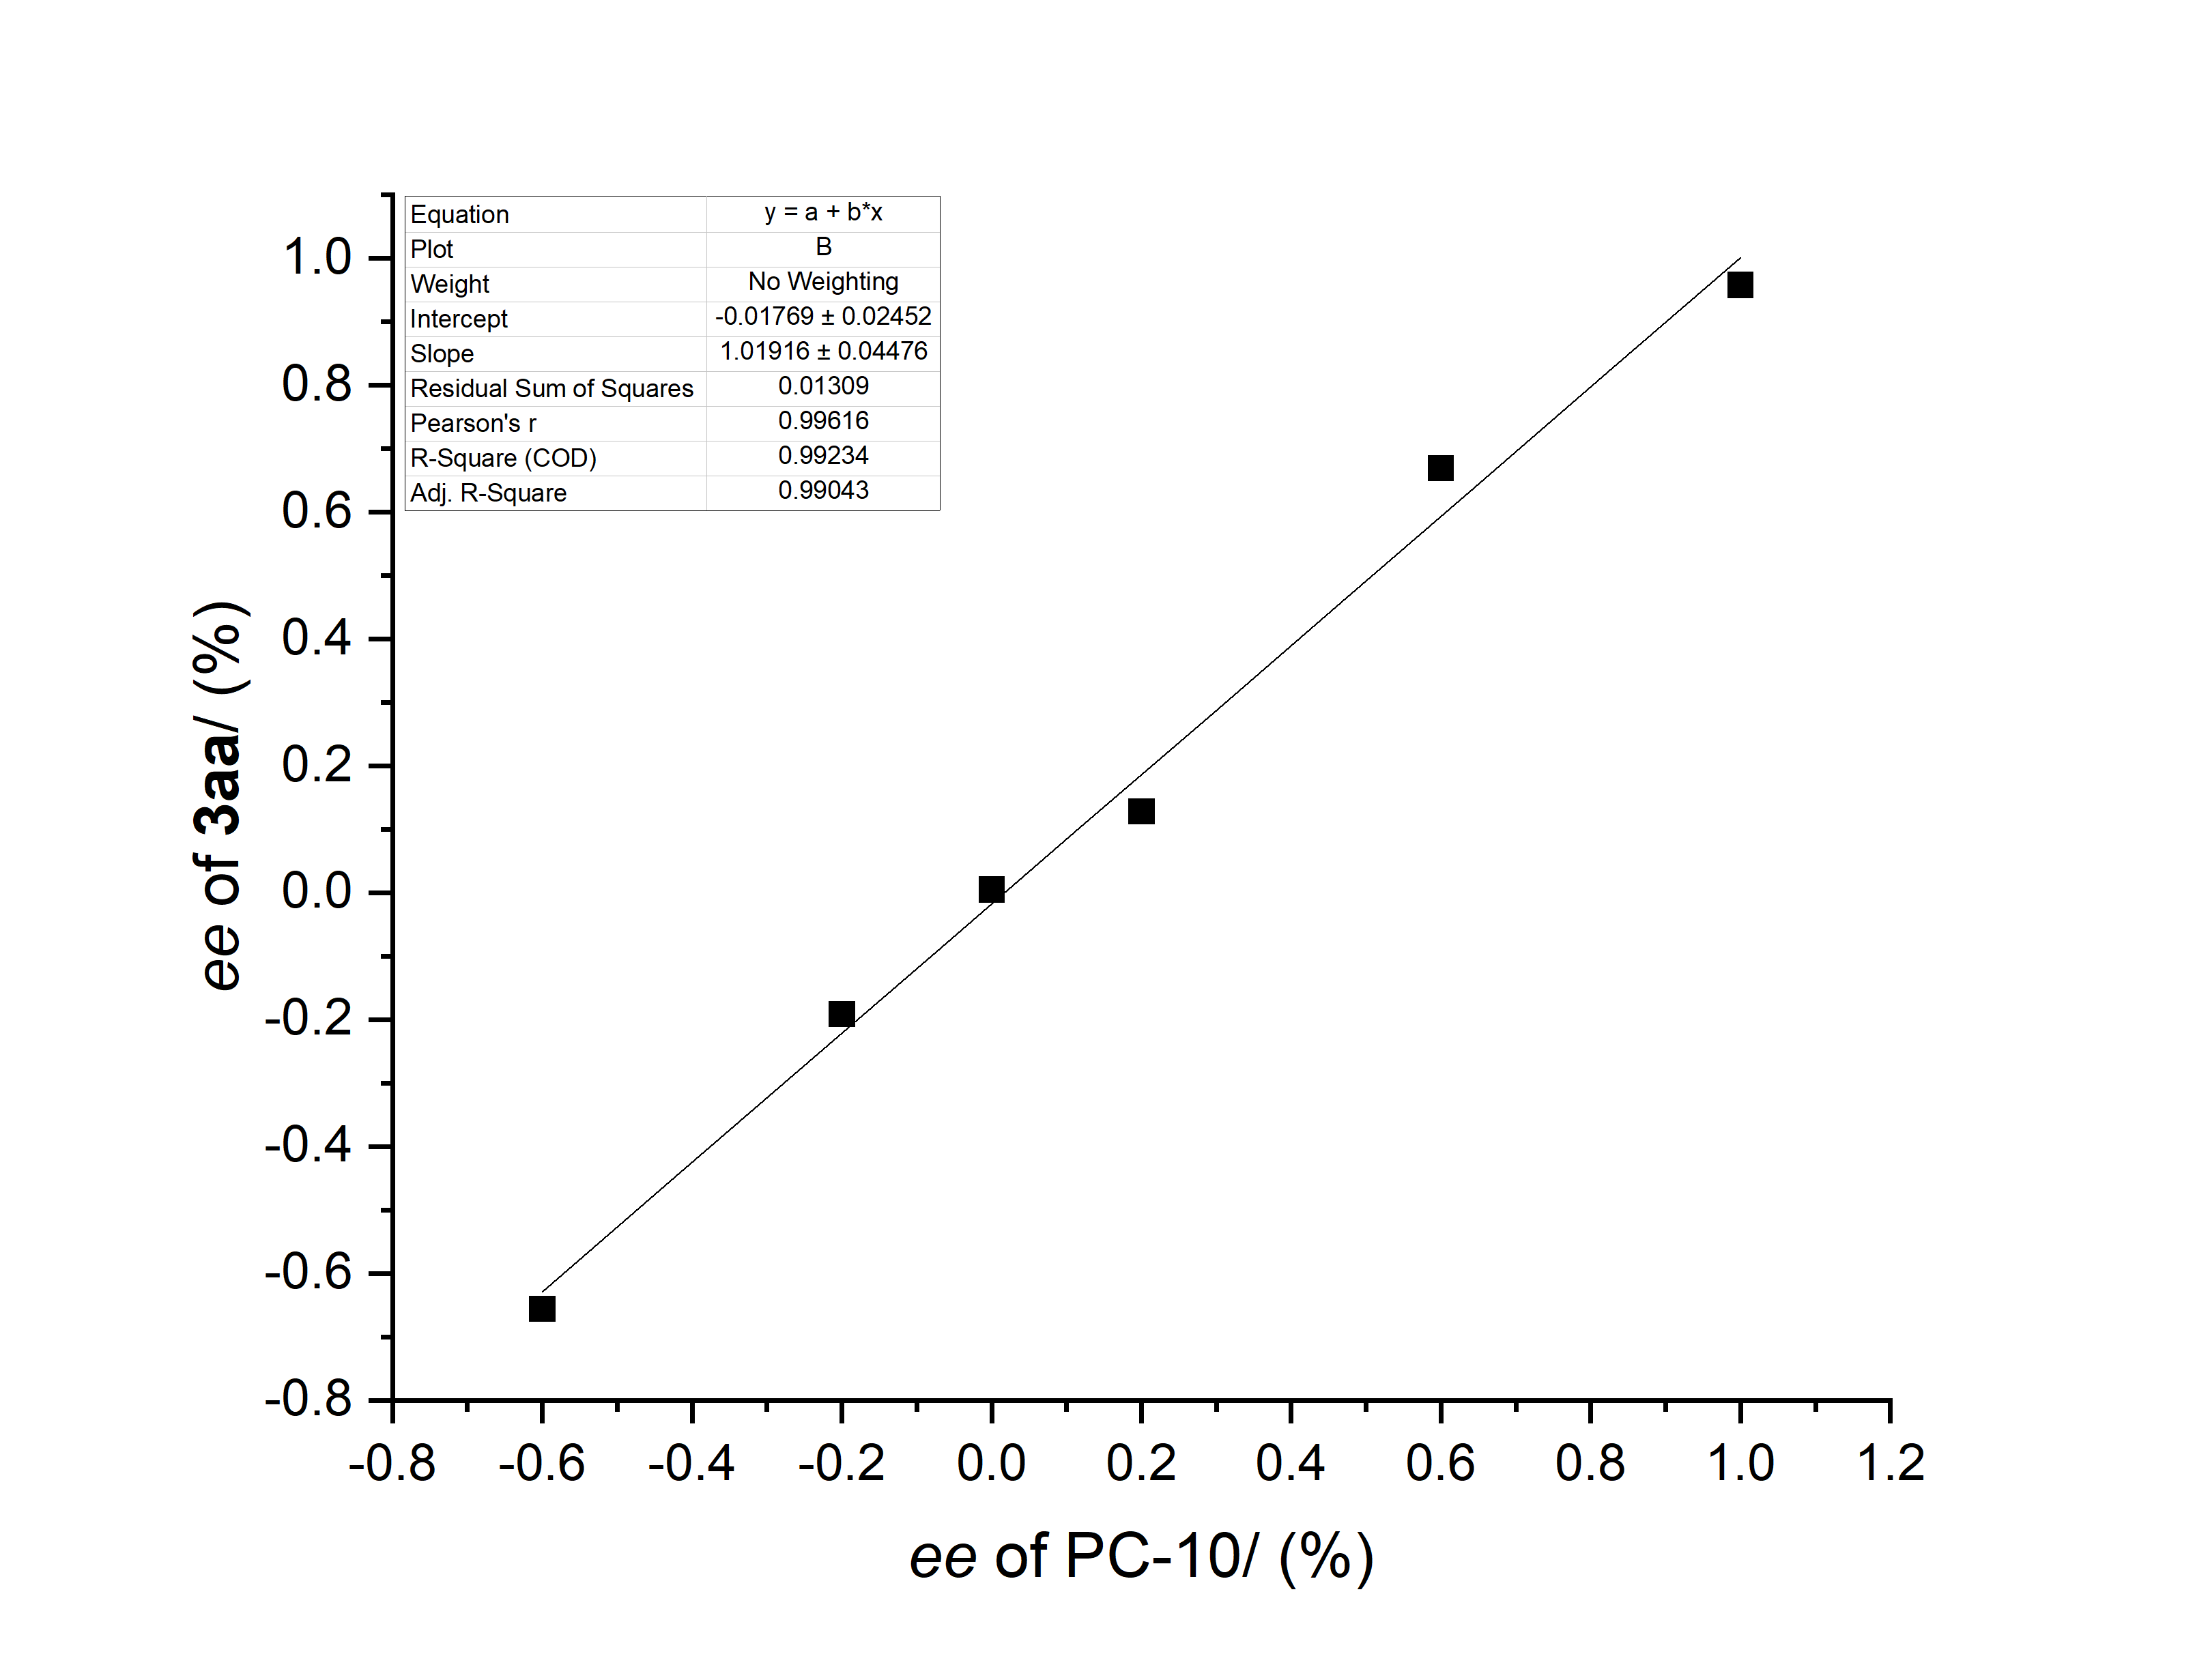


The linear relationship between the ee of the **PC10** and those of product **3aa**, which reveal that the enantioselectivity determining step might involve a single chiral sulfinamide phosphine ligand and one palladium species.

1. Sensitivity assessment of the reaction between 1a and 2a.7

The results of the sensitivity assessment are shown in **Table S3**, which was conducted using the model reaction of rac-**1a** with **2a**. The optimized conditions were chosen as the reference for comparison. Tables describe the results on yield and enantioselectivity, respectively.

**Fig. S3**. **Sensitivity Assessment of the Reaction between 1a and 2a.**


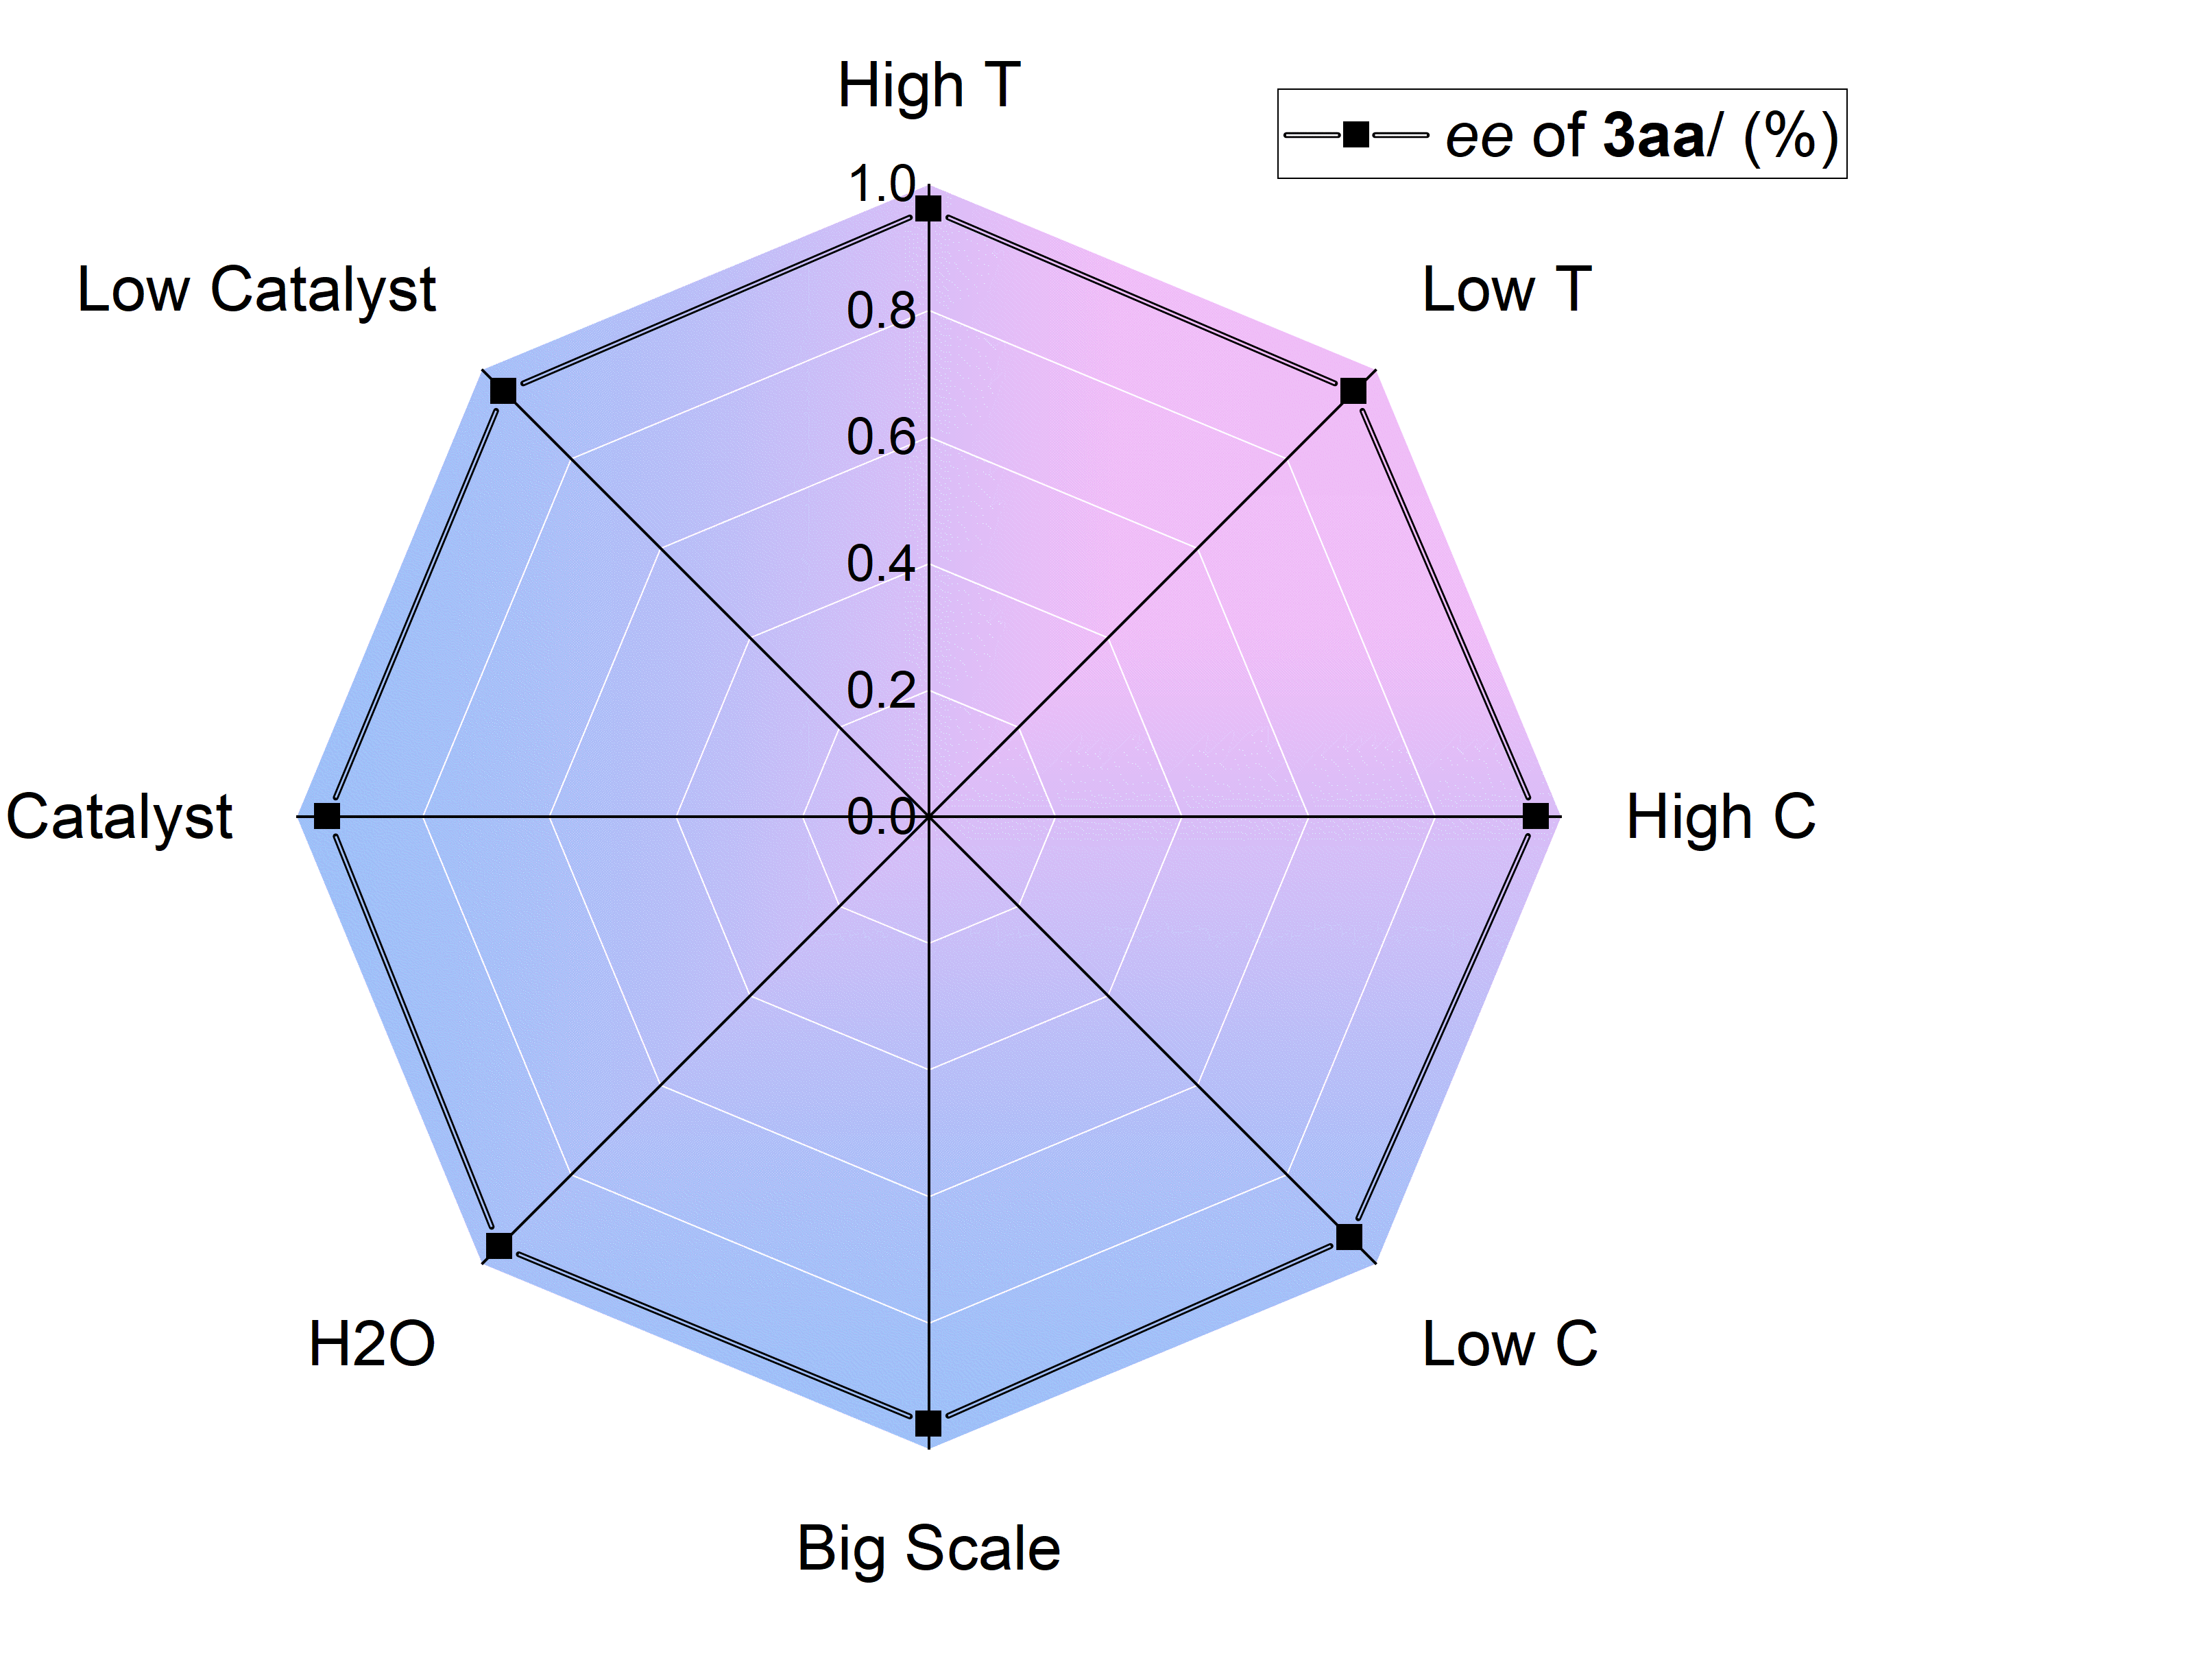

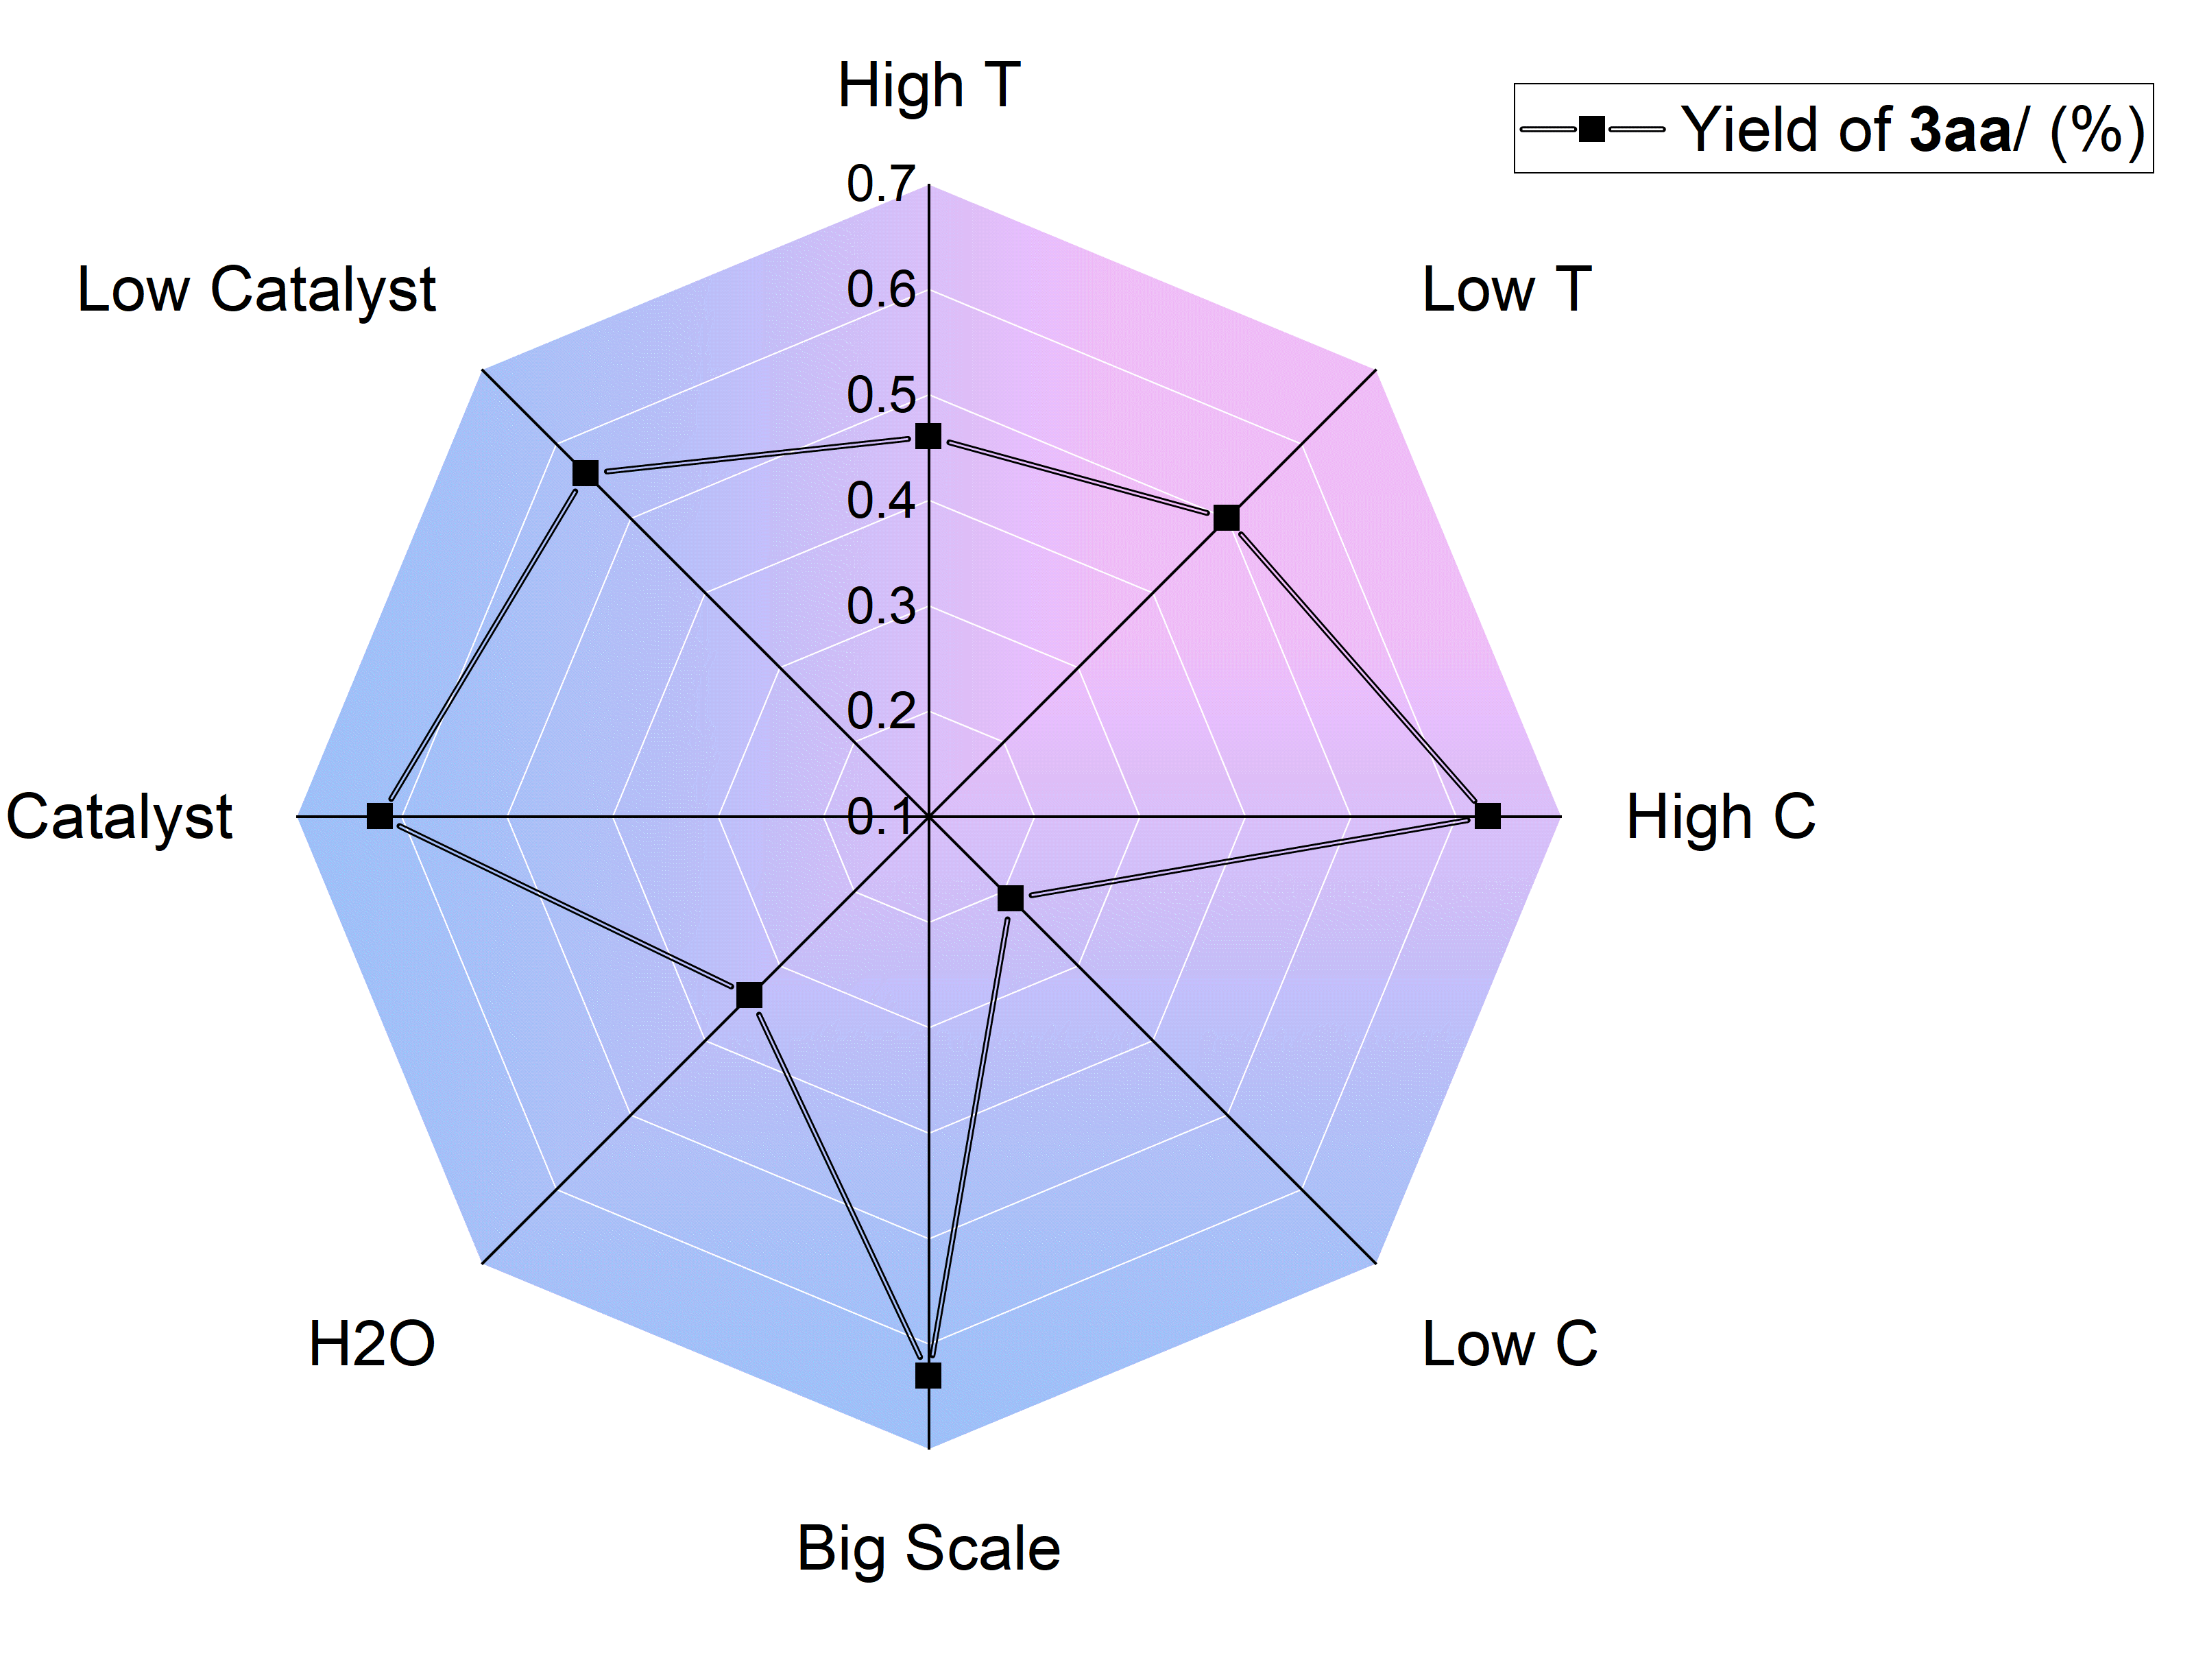


1. The effect of 3 on pro-inflammatory cytokine secretion in vitro.

**Cell culture:** RAW264.7 cells were obtained from Shanghai Cell Bank, Chinese Academy of Sciences (China) and cultured in DMEM (Corning) containing 10% FBS (Gibco) and 1% penicillin-streptomycin solution (Gibco). Cells were cultured in a sterile environment at 37°C containing 5% CO2 and 95% air.

**Cell viability assay:** The toxicity of the compound was determined by the CCK-8 assay (Beyotime, China). The RAW264.7 cells were seeded in a 96-well medium plate at a concentration of 5×104/well and cultured overnight. It was then incubated with compounds at concentrations of 50 μM and 20 μM for 24 h. Discard the old medium and add 100 μL of CCK-8 reagent and incubate for 30 min away from light. The absorbance value (OD value, 450 nm) was recorded by absorbance microplate reader (M5, Thermo, USA).

**ELISA:** Cell culture supernatants were collected and centrifuged at 12000 rpm for 5 minutes to remove dead cells. Cell supernatants were analyzed for IL-6 and TNF-α at different dilution ratios using ELISA kits (ThermoFisher, USA) according to the manufacturer's instructions.

**Fig. S4 The Effect of 3 on Pro-inflammatory Cytokine Secretion in Vitro.**


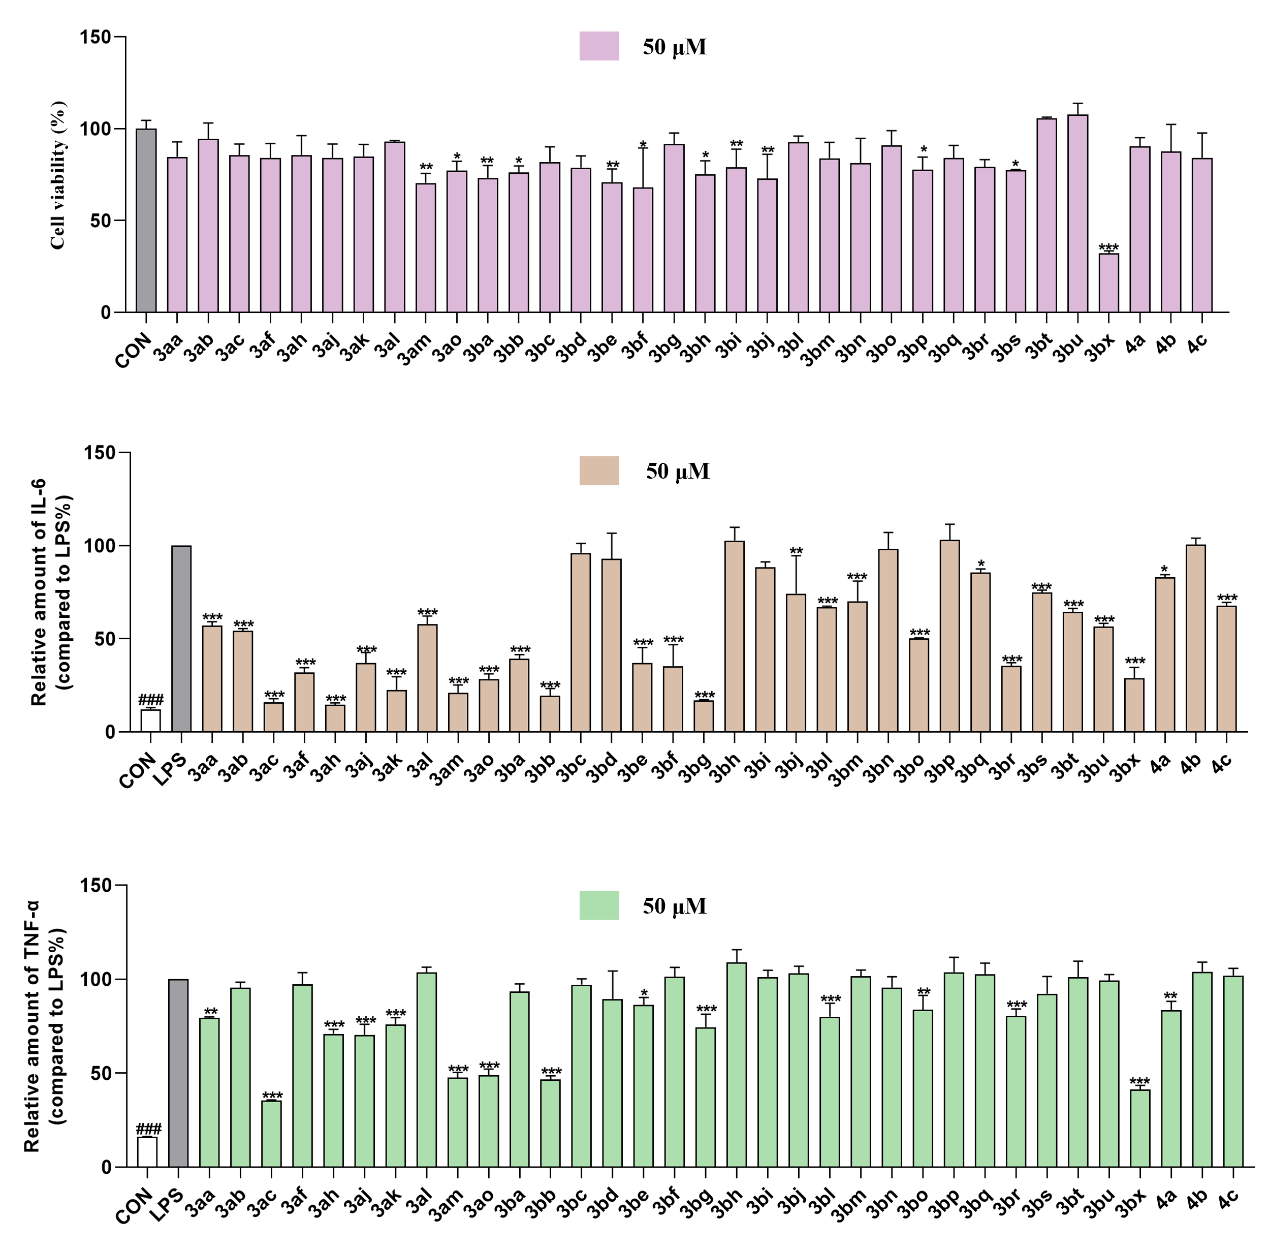


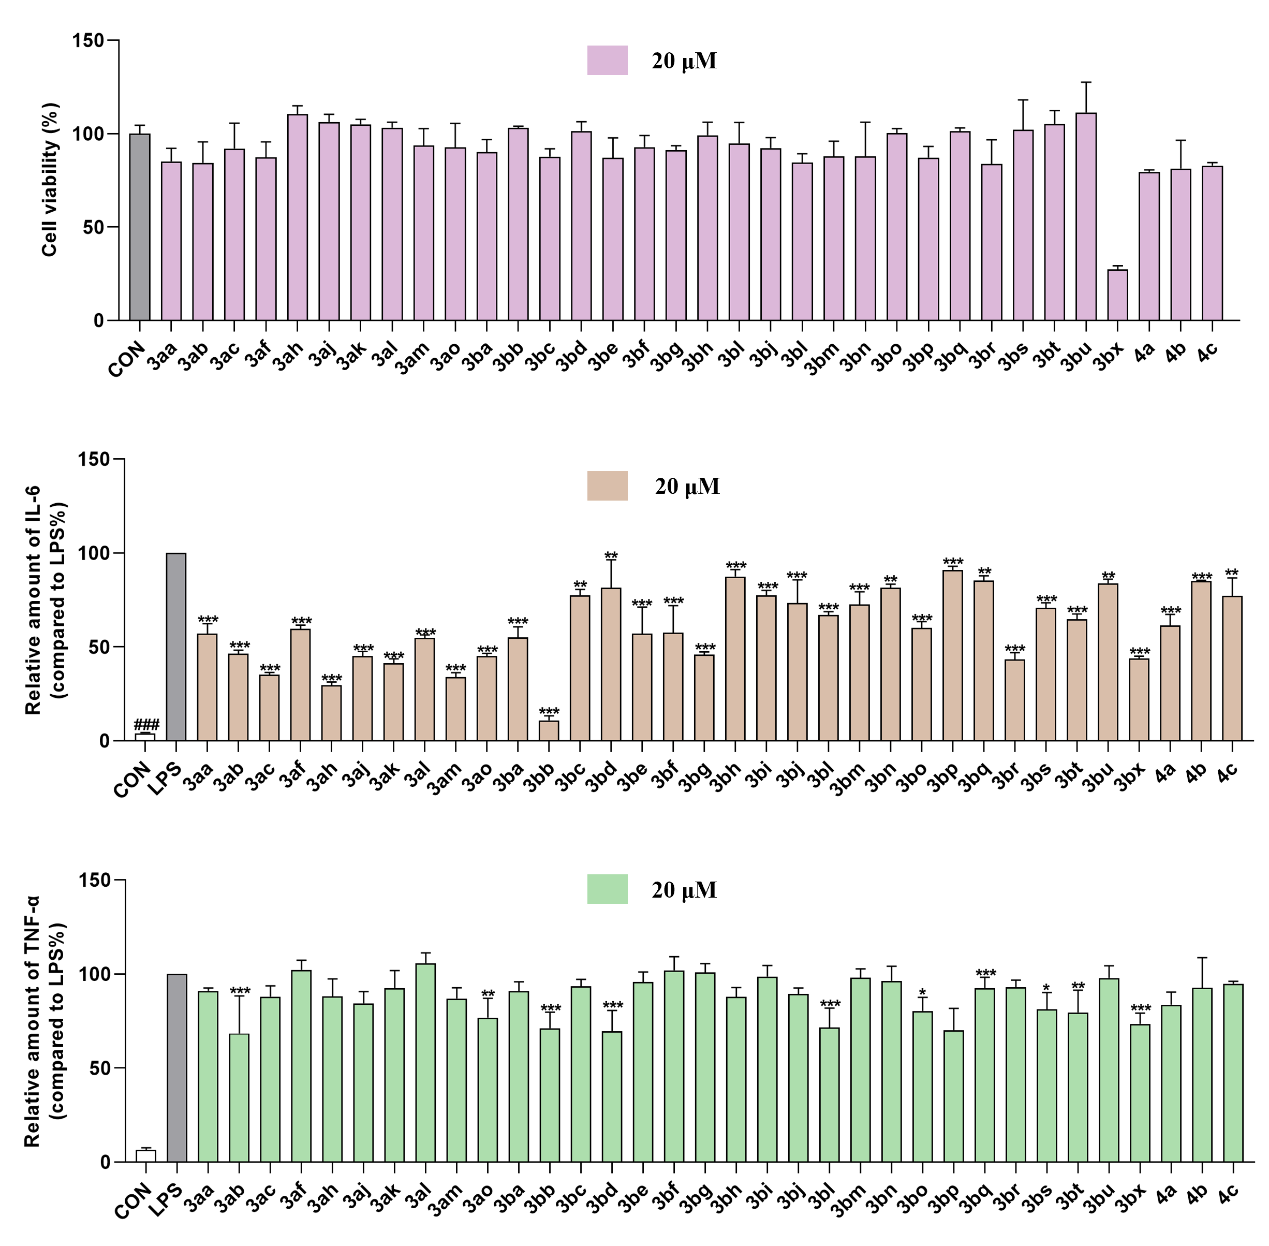


To evaluate their anti-inflammatory activity, we employed RAW 264.7 cells (mouse monocyte/macrophage cell) as the in vitro model. Initially, CCK-8 (Cell Counting Kit-8) assay was performed to test the effects of the spiralenones **3** on cell viability. RAW 264.7 cells were treated with the spiralenones **3** ranging from 20 to 50 µM for 24 hours, there had no effect on the cell viability of RAW 264.7 cell. Following treatment with spiralenones **3** (20 and 50 µM) and stimulated by LPS, the levels of two main pro-inflammation cytokines including interleukin-6 (IL-6) and tumor necrosis factor-alpha (TNF-α) were decreased.

1. Synthesis of the PC-Phos.1

To an oven-dried 500 mL three neck round bottom flask equipped with a stir bar was added 9,9-dimethylxanthene (21.0 g, 100 mmol, cas: 19814-75-6, Greenchem), anhydrous FeCl3 (811 mg, 5% mol, cas: 7705-08-0, Macklin) in 100 mL DCM under N2. The mixture was stirred at 0 oC for 10 min, *t*BuCl (27.1 mL, 2.5 equiv, cas: 507-20-0, Energy Chemical) was added at a rate of 10 mL/min. After the addition is complete, moved the reaction to room temperature for 15 h, quenched by water, and extracted with DCM, dried over anhydrous Na2SO4, then the solvent was removed under reduced pressure. The crude product was recrystallized from ethanol to give **S1** (29.3 g, 91% yield) as a white solid.

To an oven-dried 500 mL three neck round bottom flask equipped with a stir bar was added **S1** (29.3 g, 91 mmol) in 150 mL CHCl3 under N2. The mixture was stirred at 0 oC for 10 min, Br2 (10.7 mL, 2.3 equiv) was added at a rate of 10 mL/min. (Note: HBr is produced during the dripping process, connect the pipe to pass it into the fume hood, and treat the exhaust gas with aq. NaHCO3.) After the addition is complete, stirred at 0 oC for 12 h, quenched by NaHSO3, and extracted with DCM, dried over anhydrous Na2SO4, then the solvent was removed under reduced pressure. The crude product was recrystallized from EtOH to give **S2** (40.6 g, 93% yield) as a white solid.

To an oven-dried 500 mL three neck round bottom flask equipped with a stir bar was added **S2** (14.3 g, 30 mmol) in 250 mL THF under N2. The mixture was cooled to -78 °C for 10 min, *n*BuLi (2.5 M in hexanes, 12 mL, 1 equiv) was added at a rate of 10 mL/min. The mixture was stirred at -78 °C for 1.5 h. Then added slowly ClPPh2 (5.4 ml, 1 eq, cas: Energy Chemical) and stirred at -78 °C for 2 h. Later, *n*BuLi (2.5 M in hexanes, 24 mL, 2 equiv) was added at a rate of 10 mL/min, and stirred at -78 °C for 2 h. Then add dry DMF (6.9 mL, 3 equiv) at -78 °C, moved the reaction to room temperature for 2 h, quenched by NH4Cl, extracted with EtOAc, dried over anhydrous Na2SO4, then the solvent was removed under reduced pressure. The crude product was purified by column chromatography (PE:EtOAc=20:1) to give **S3** (9.6 g, 60% yield) as a white solid.

To an oven-dried 250 mL three neck round bottom flask equipped with a stir bar was added **S3** (5.3 g, 10 mmol), (*Rs*)-TBSA (1.3 g, 1.1 eq, cas: 196929-78-9, Allychem) in 30 mL THF under N2. The mixture was stirred 10 min, Ti(OEt)4 (4.2 mL, 2 equiv, cas: 3087-36-3, Energy Chemical) was added and move the reaction to 60 °C for 10 h. (adding a large amount of EtOAc, water, silica gel and stirred at r.t. for 2 h to precipitate a large amount of titanate solids) Then filtered and extracted with EtOAc, wash with saturated NaCl, dried over anhydrous Na2SO4, then the solvent was removed under reduced pressure. The crude product was purified by column chromatography (PE:EtOAc:DCM= 20:1:1) to give **S4** (4.7 g, 74% yield) as a white solid.

To an oven-dried 100 mL three neck round bottom flask equipped with a stir bar was added **S4** (3.2 g, 5 mmol) in 30 mL THF under N2. The mixture was cooled to -78 °C for 10 min, (3,5-difluorophenyl) magnesium bromide (20 mL, 2 equiv, 0.5 M in THF, cas: 62351-47-7, Sigma-Aldrich) was added. After the addition is complete, stirred at -78 °C for 0.5 h. Turn off refrigeration and stir overnight, quenched by saturated NH4Cl, and then extracted with EtOAc, dried over anhydrous Na2SO4, then the solvent was removed under reduced pressure. The crude product was purified by column chromatography (PE:EtOAc = 10:1 to 5:1) to give *t*Bu-PC-Phos (PC-10) (2.8 g, 76% yield) as a white solid.

1. Sythesis of the substrates.

**6.1** **General procedure for the preparation of racemic phenolic biaryls**.2

The following 1-naphthol substrates were prepared by Suzuki-Miyaura coupling reaction between (4-methoxynaphthalen-1-yl)boronic acid and corresponding ortho-dihalogenated aryl derivatives, followed by demethylation with BBr3.

**Method A**: A 50 mL round bottom flask with a stir bar was fitted with a rubber septum and flame dried under high vacuum. The flask was purged with N2 and charged with Pd(dba)2 (72 mg, 2.5 mol%), PPh3 (65 mg, 5 mol%), CsF (1.5 g, 2.0 equiv.), (4-methoxyphenyl)boronic acid (1.5 g, 1.5 equiv), ortho-dihalogenated aryl derivatives (5 mmol), 15 mL DME. The mixture was stirred at 90 ºC until the reaction was judged to be completed by TLC analysis. Water was added and the mixture was diluted with ethyl acetate. The layers were separated and the organic layer was washed with water and brine, dried over anhydrous Na2SO4 and concentrated under reduced pressure. The residue was then chromatographed on silica gel to afford the desired compound.

Under an argon atmosphere, a solution of BBr3 (2M in DCM) was slowly added to a solution of the above product in DCM (10 mL) at 0 ºC and the mixture was stirred at room temperature for 3 h. After cooling to 0 ºC, the reaction was quenched with cold water and extracted with DCM. The organic layer was dried over anhydrous Na2SO4 and concentrated under reduced pressure. The residue was then chromatographed on silica gel to afford the desired product **1**.

**Method B**: A 50 mL round bottom flask with a stir bar was fitted with a rubber septum and flame dried under high vacuum. The flask was purged with a stir bar was fitted with a rubber septum and flame dried under high vacuum. The flask was purged with N2 and charged with Pd(dba)2 (72 mg, 2.5 mol%), PPh3 (65 mg, 5 mol%), CsF (1.5 g, 2.0 equiv), (4-(methoxymethoxy)naphthalen-1-yl)boronic acid (1.70 g, 1.5 equiv), ortho-dihalogenated aryl derivatives, 15 mL DME. The mixture was stirred at 90 ºC until the reaction was judged to be completed by TLC analysis. Water was added and the mixture was diluted with ethyl acetate. The layers were separated and the organic layer was washed with water and brine, dried over anhydrous Na2SO4 and concentrated under reduced pressure. The residue was chromatographed on silica gel, eluted with PE:EA = 50:1 to afford the desired compound.

The above product was dissolved in 15 mL MeOH in a 50 mL round bottom flask, warmed to 70 ºC and conc. HCl aq. (4 drops) was added. After stirring for 3 h, the flask was removed from the oil bath and cooled to room temperature, 40 mL of distilled water was added and the aqueous layer was extracted with EtOAc. The combined organic layers were washed with brine, dried over anhydrous MgSO4, and concentrated under reduced pressure to give a crude product, which was purified by column chromatography (PE:EA = 10:1) to afford product **1**.

**6.2** **Sythesis of cyclic 1,3-diene**.3

*Conversion of allyl alcohols to cyclic 1,3-dienes (****2****) by sequential sulfenate-sulfoxide sigmatropic rearrangement and syn Elimination.*

To a solution of 2-Cyclohexen-1-one (10 mmol, 0.97 mL, cas: 930-68-7, Bide) in 20 mL dry Et2O at -78 °C for 10 min under N2, was added lithium reagent (15 mmol, 1.5 equiv, 1 M in Et2O), the mixture was stirred at -78 °C for 10 min, and allowed to warm to room temperature for another 30 min. When completed, the reaction mixture was quenched by saturated NH4Cl and diluted with EtOAc. The organic layer was separated, and the aqueous layer was extracted twice with EtOAc. The combined organic layers were dried over Na2SO4, filtered, concentrated, and purified by flash chromatography (PE: EtOAc = 3:1) to isolated Allyl Alcohols **S8** as liquid (77-93 % yield).

To a solution of allyl alcohols S8 (5 mmol) and Et3N (10.0 mmol, 2.0 equiv) in 20 mL dry DCM at 0 °C for 10 min under N2, to the mixture was added 2-NBSC (5.5 mmol, 1.1 equiv, 2-Nitrobenzenesulfenyl chloride, cas: 7669-54-7, *Bide*) (When R= alkyl, allyl, vinyl. 2,4-NBSC instead of 2-NBSC, 2,4-dinitrobenzenesulfenyl chloride, cas: 528-76-7, TCI) at 0 °C for 10 min, and allowed to warm to room temperature for another 2 h. When completed, n-Hexane was added to the reaction mixture. The precipitate was filtered out (celite), and the solution was washed with H2O and brine and dried over Na2SO4, filtered, concentrated, and purified by flash chromatography (n-Hexane) to isolated dienes product 5 as liquid or solid (57-83 % yield). (Note: The prepared 1,3-diene should be stored at low temperature and protected from light.

1. General procedure for dearomative spiroannulation of racemic phenolic biaryls with 1,3-cyclohexadienes.

**Method**: Under nitrogen atmosphere, to an oven-dried 10 mL Schlenk tube equipped with a magnetic stir bar was added Pd2(dba)3 (13.7 mg, 5 mol%, *Energy Chemical*), Sadphos (20 mol%, **PC4**, 47.0 mg), K2HPO4 (104.5 mg, 0.6 mmol, 2.0 equiv) and mesitylene (1.5 mL). The catalyst/ligand and base solution was stirred for 1 h at room temperature. After 1 h, *rac*-biaryl **1** (0.3 mmol, 1.0 equiv), and 1,3-dienes **2** (0.9 mmol, 3.0 equiv) were added successively. The resulting mixture was then stirred vigorously (550 rpm) at 60 oC in oil bath for about 96-108 h. After completion of the reaction (monitored by TLC), the reaction mixture was concentrated to dryness and the residue was purified by column chromatography (petroleum ether/ethyl acetate) to afford desired product **3**/**4**.

**(4a*R*,9*R*,9a*S*)-2-phenyl-3,4,4a,9a-tetrahydro-4'H-spiro[fluorene-9,1'-naphthalen]-4'-one (3aa).**

The crude product was purified by column chromatography (petroleum ether/ethyl acetate = 50：1 to 30:1) to afford the product as white solid (86.4 mg, 77% yield).

**1H NMR** (400 MHz, CDCl3) δ 8.26 (dd, *J =* 7.8, 1.6 Hz, 1H), 7.54 – 7.37 (m, 3H), 7.36 – 7.05 (m, 9H), 6.92 (d, *J =* 10.3 Hz, 1H), 6.70 (d, *J =* 7.6 Hz, 1H), 6.37 (d, *J =* 10.3 Hz, 1H), 5.79 (dt, *J =* 3.8, 1.5 Hz, 1H), 3.75 (ddd, *J =* 8.2, 3.9, 1.9 Hz, 1H), 3.65 (ddd, *J =* 13.2, 8.5, 5.0 Hz, 1H), 2.59 (ddq, *J =* 6.7, 4.8, 2.1 Hz, 3H), 2.41 – 2.29 (m, 1H), 1.70 (ddt, *J =* 12.8, 9.4, 6.3 Hz, 1H).

**13C NMR** (100 MHz, CDCl3) δ 185.1, 154.1, 149.2, 147.4, 145.5, 141.6, 138.4, 132.8, 132.3, 128.7, 128.3 (overlapped), 128.2, 127.9, 127.2, 127.0, 126.1, 125.7, 125.5, 125.2 (overlapped), 124.8, 121.9, 58.3, 54.9, 42.8, 29.0, 27.2.

**M.P.**: 76.4-77.9 oC.

**[α]D20** = 80.0 (c = 0.2, CHCl3).

**HRMS (EI)**: m/z: [M]+ Calcd for C28H22O：374.1671, found: 374.1665.

**HPLC conditions**: Daicel Chiralpak IA column (90:10 n-Hexane: 2-Propanol, 1.0 mL/min, 254 nm); tr (minor) = 6.9 min, tr (major) = 9.4 min; 96% *ee*).


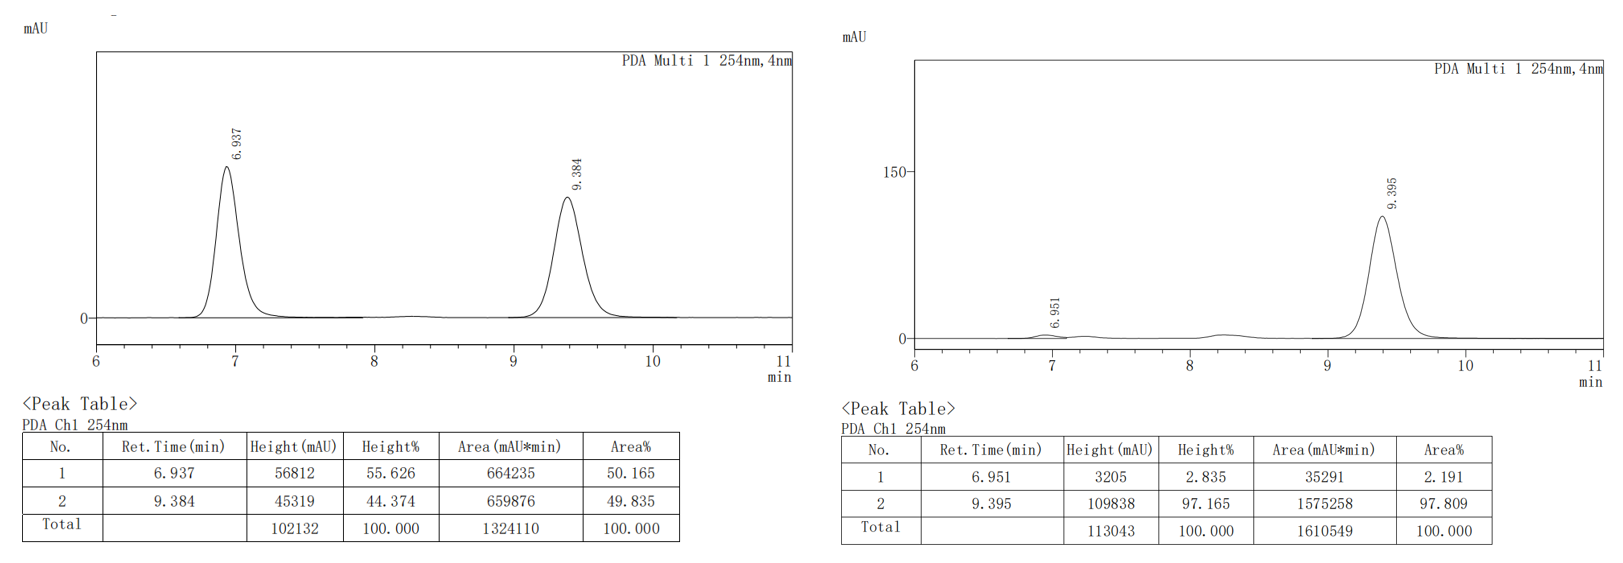


**(4a*R*,9*R*,9a*S*)-6-methoxy-2-phenyl-3,4,4a,9a-tetrahydro-4'H-spiro[fluorene-9,1'-naphthalen]-4'-one (3ab).**

The crude product was purified by column chromatography (petroleum ether/ethyl acetate = 50：1 to 30:1) to afford the product as white solid (95.8 mg, 79% yield).

**1H NMR** (400 MHz, CDCl3) δ 8.24 (dd, *J =* 7.8, 1.6 Hz, 1H), 7.50 (td, *J =* 7.7, 1.6 Hz, 1H), 7.41 (td, *J =* 7.5, 1.3 Hz, 1H), 7.34 – 7.16 (m, 6H), 6.97 (d, *J =* 2.5 Hz, 1H), 6.91 (d, *J =* 10.2 Hz, 1H), 6.73 (dd, *J =* 8.4, 2.5 Hz, 1H), 6.61 (d, *J =* 8.4 Hz, 1H), 6.36 (d, *J =* 10.2 Hz, 1H), 5.77 (dd, *J =* 4.1, 1.8 Hz, 1H), 3.84 (s, 3H), 3.75 (ddt, *J =* 8.0, 3.8, 1.8 Hz, 1H), 3.61 (ddd, *J =* 13.2, 8.5, 5.1 Hz, 1H), 2.58 (dtd, *J =* 9.3, 4.8, 4.4, 2.2 Hz, 2H), 2.40 – 2.29 (m, 1H), 1.70 (tdd, *J =* 13.0, 10.2, 6.1 Hz, 1H).

**13C NMR** (100 MHz, CDCl3) δ 185.2, 160.1, 154.6, 149.5, 149.0, 141.6, 138.3, 137.3, 132.8, 132.2, 128.6, 128.3 (overlapped), 127.2, 127.0, 126.2, 126.1, 125.6, 125.2 (overlapped), 122.0, 114.0, 109.8, 57.6, 55.5, 55.4, 42.9, 29.0, 27.2.

**HRMS (EI)**: m/z: [M]+ Calcd for, C29H24O2, 404.1776, found: 404.1773.

**M.P.**: 160.3-163.2oC.

**[α]D20** = 59.4 (c = 0.2, CHCl3)

**HPLC conditions**: Daicel Chiralpak IB column (90:10 n-Hexane: 2-Propanol, 0.5 mL/min, 254 nm); tr (minor) = 16.3 min, tr (major) = 14.6 min; 98% *ee*).


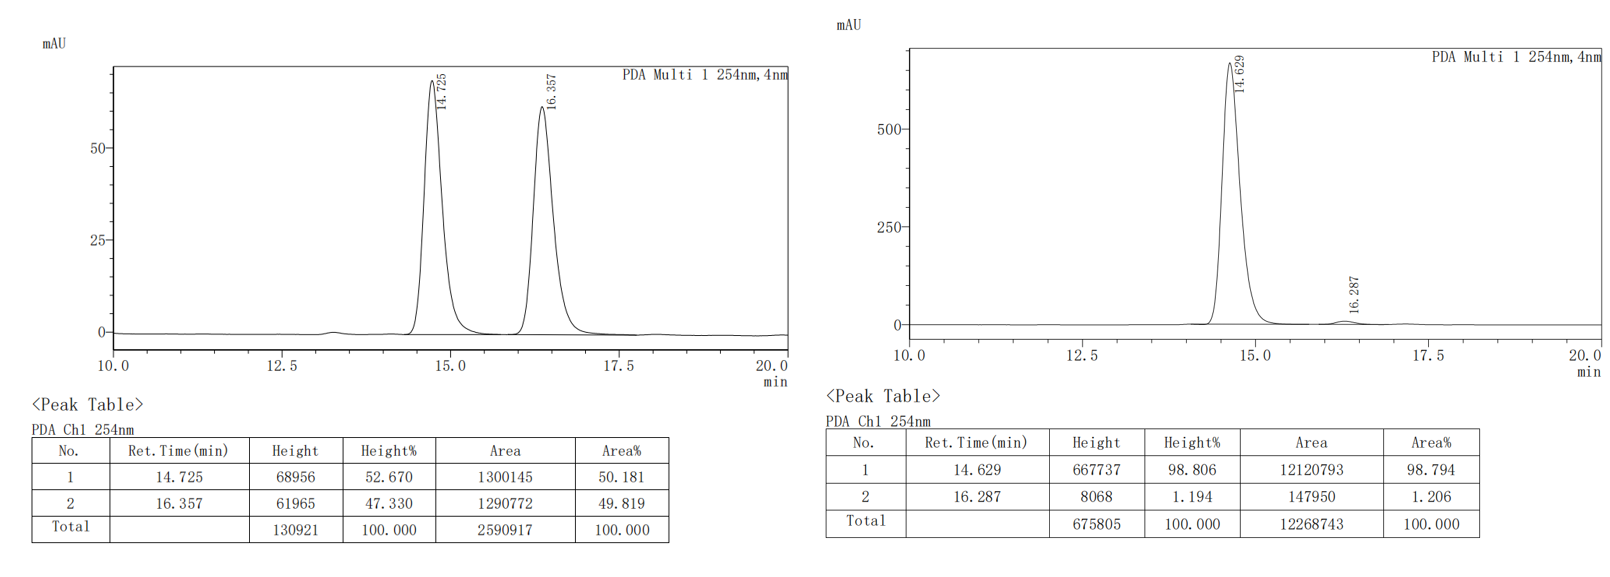


(4a*R*,9*R*,9a*S*)-2-phenyl-6-(trifluoromethoxy)-3,4,4a,9a-tetrahydro-4'H-spiro[fluorene-9,1'-naphthalen]-4'-one (**3ac**).

The crude product was purified by column chromatography (petroleum ether/ethyl acetate = 50：1 to 30:1) to afford the product as white solid (87.9 mg, 64% yield).

**1H NMR** (400 MHz, CDCl3) δ 8.26 (dd, *J =* 7.9, 1.6 Hz, 1H), 7.52 (td, *J =* 7.6, 1.6 Hz, 1H), 7.43 (td, *J =* 7.6, 1.2 Hz, 1H), 7.33 – 7.16 (m, 7H), 7.02 (dd, *J =* 8.4, 2.3 Hz, 1H), 6.88 (d, *J =* 10.2 Hz, 1H), 6.72 (d, *J =* 8.4 Hz, 1H), 6.39 (d, *J =* 10.2 Hz, 1H), 5.76 (d, *J =* 4.1 Hz, 1H), 3.78 (ddd, *J =* 8.9, 4.0, 2.2 Hz, 1H), 3.65 (ddd, *J =* 13.3, 8.5, 5.1 Hz, 1H), 2.61 (tdd, *J =* 9.8, 5.3, 2.6 Hz, 2H), 2.40 – 2.29 (m, 1H), 1.71 (tdd, *J =* 13.0, 10.2, 6.0 Hz, 1H).

**13C NMR** (100 MHz, CDCl3) δ 184.8, 153.3, 149.3 (q, *J* = 2.0 Hz), 149.3, 148.5, 144.1, 141.4, 138.6, 133.0, 132.2, 128.5, 128.3 (overlapped), 127.3, 127.3, 126.7, 126.2, 126.1, 125.2 (overlapped), 121.4, 120.8, 120.4 (q, *J* = 257.5 Hz), 117.3, 57.6, 55.2, 42.7, 28.7, 27.0.

**19F NMR** (376 MHz, CDCl3) δ -57.68.

**HRMS (EI)**: m/z: [M]+ Calcd for, C29H21F3O2, 458.1494, found: 458.1488.

**M.P.**: 70.8-73.9 oC.

**[α]D20** = 79.6 (c = 0.2, CHCl3).

**HPLC conditions:** Daicel Chiralpak IB (95:5 n-Hexane: 2-Propanol, 0.5 mL/min, 254 nm); tr (minor) = 18.2 min, tr (major) = 15.8 min; 91% *ee*).


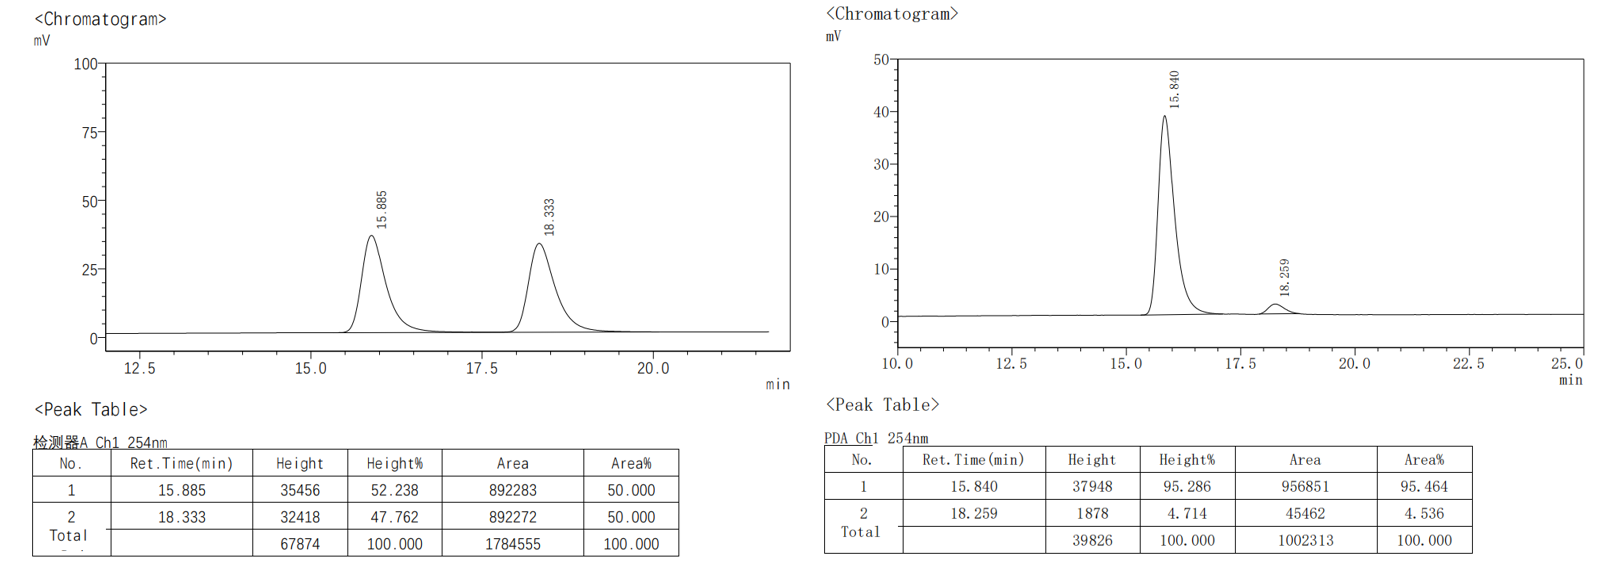


**(4a*R*,9*R*,9a*S*)-2-phenyl-6-(trifluoromethyl)-3,4,4a,9a-tetrahydro-4'H-spiro[fluorene-9,1'-naphthalen]-4'-one** (**3ad**).

The crude product was purified by column chromatography (petroleum ether/ethyl acetate = 50：1 to 30:1) to afford the product as white solid (88.8 mg, 67% yield).

**1H NMR** (400 MHz, CDCl3) δ 8.27 (dd, *J =* 7.8, 1.6 Hz, 1H), 7.72 (s, 1H), 7.53 (td, *J =* 7.5, 1.6 Hz, 1H), 7.49 – 7.41 (m, 2H), 7.30 (s, 2H), 7.27 (d, *J =* 11.1 Hz, 2H), 7.23 (td, *J =* 6.2, 5.7, 2.3 Hz, 1H), 7.16 (d, *J =* 7.9 Hz, 1H), 6.86 (dd, *J =* 18.2, 9.1 Hz, 2H), 6.42 (d, *J =* 10.2 Hz, 1H), 5.80 – 5.75 (m, 1H), 3.82 – 3.77 (m, 1H), 3.71 (ddd, *J =* 13.3, 8.5, 5.1 Hz, 1H), 2.70 – 2.53 (m, 2H), 2.40 (dq, *J =* 13.2, 4.3 Hz, 1H), 1.72 (tdd, *J =* 13.0, 9.9, 6.3 Hz, 1H).

**13C NMR** (100 MHz, CDCl3) 184.8, 152.8, 149.7, 148.2, 148.1, 141.4, 138.8, 133.1, 132.2, 130.8 (q, J = 32.2 Hz), 128.5, 128.3 (overlapped), 127.5, 127.4, 126.4, 126.4, 126.0, 125.2 (overlapped), 125.1 (q, *J* = 4.0 Hz), 122.8, 121.9 (q, *J* = 4.0 Hz), 121.3, 77.0, 58.0, 54.9, 42.6, 28.8, 27.1.

**19F NMR** (376 MHz, CDCl3) δ -62.17.

**HRMS (EI)**: m/z: [M]+ Calcd for, C29H21F3O, 442.1544, found: 442.1539.

**M.P.**: 75.1-77.2 oC.

**[α]D20** = 76.2 c = 0.2, CHCl3).

**HPLC conditions**: Daicel Chiralpak IB column (95:5 n-Hexane: 2-Propanol, 0.5 mL/min, 254 nm); tr (minor) = 20.3 min, tr (major) = 17.0 min; 81% *ee*).


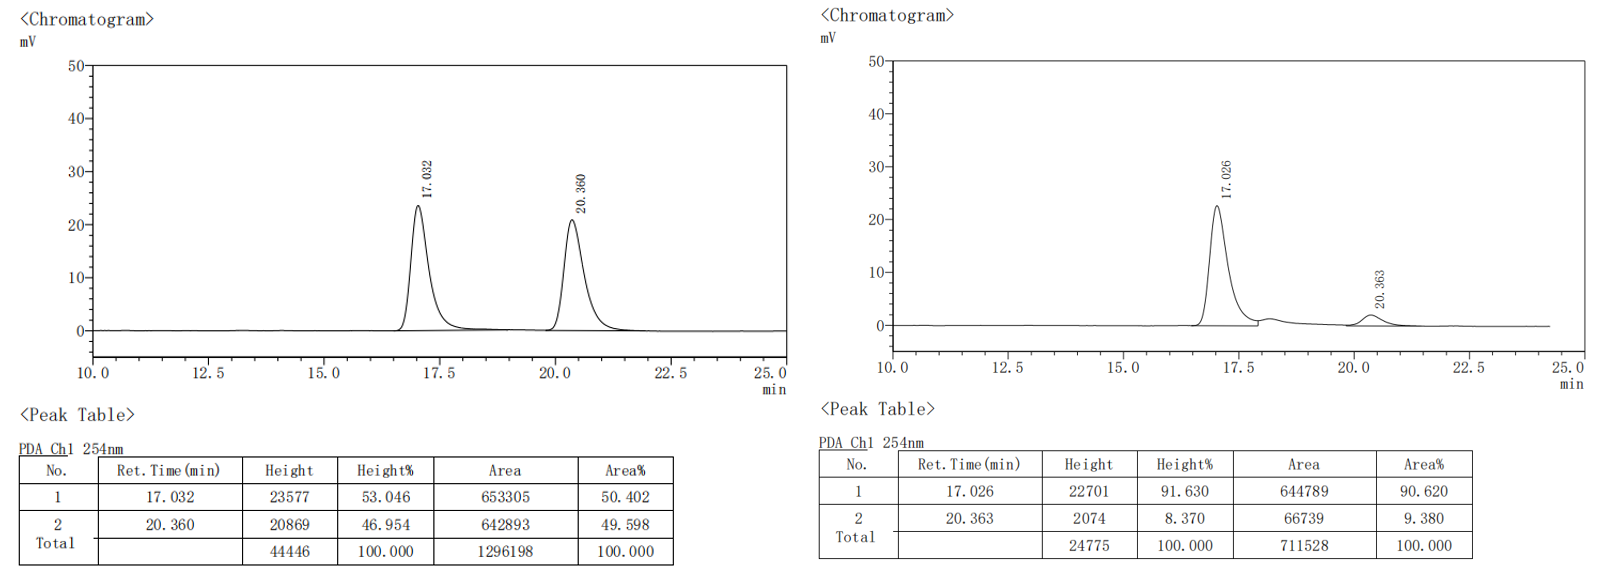


**Methyl(4a*R*,9*R*,9a*S*)-4'-oxo-2-phenyl-3,4,4a,9a-tetrahydro-4'H-spiro[fluorene-9,1'-naphthalene]-6-carboxylate** (**3ae**)

The crude product was purified by column chromatography (petroleum ether/ethyl acetate = 50：1 to 20:1) to afford the product as white solid (77.8 mg, 74% yield).

**1H NMR** (400 MHz, CDCl3) δ 8.27 (dd, *J =* 7.8, 1.6 Hz, 1H), 8.15 (d, *J =* 1.6 Hz, 1H), 7.86 (dd, *J =* 8.0, 1.6 Hz, 1H), 7.55 – 7.36 (m, 6H), 7.33 – 7.22 (m, 6H), 7.15 (dd, *J =* 8.0, 1.3 Hz, 1H), 6.93 (dd, *J =* 8.3, 1.9 Hz, 1H), 6.89 (d, *J =* 10.3 Hz, 1H), 6.78 (d, *J =* 8.0 Hz, 1H), 6.42 (d, *J =* 10.3 Hz, 1H), 5.77 (dd, *J =* 4.1, 1.7 Hz, 1H), 3.94 (s, 3H), 3.79 (ddt, *J =* 8.2, 3.9, 1.8 Hz, 1H), 3.69 (ddd, *J =* 13.2, 8.5, 5.1 Hz, 1H), 2.60 (qd, *J =* 4.3, 2.0 Hz, 2H), 2.46 – 2.37 (m, 1H), 1.71 (tdd, *J =* 12.9, 9.6, 6.5 Hz, 2H).

**13C NMR** (100 MHz, CDCl3) 185.0, 166.9, 153.1, 150.8, 148.5, 147.8, 141.4, 138.7, 133.1, 132.2, 130.4, 129.5, 128.7, 128.5, 128.3, 127.4, 127.3, 126.7, 126.3, 126.3, 125.5, 125.2, 121.4, 115.7, 58.1, 55.0, 52.2, 42.5, 28.8, 27.0

**HRMS (EI)**: m/z: [M]+ Calcd for, C29H24O2, 432.1725, found: 432.1720.

**M.P.**: 71.5-72.7 oC.

**[α]D20** = -15.2 (c = 0.2, CHCl3).

**HPLC conditions**: Daicel Chiralpak IB column (90:10 n-Hexane: 2-Propanol, 0.5 mL/min, 254 nm); tr (minor) = 14.4 min, tr (major) = 11.0 min; 96% *ee*).


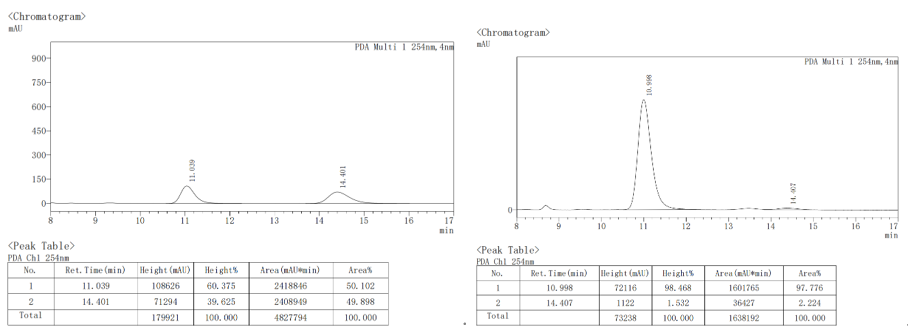


(4a*R*,9*R*,9a*S*)-7-methoxy-2-phenyl-3,4,4a,9a-tetrahydro-4'H-spiro [fluorene-9,1'-naphthalen]-4'-one (3af).

The crude product was purified by column chromatography (petroleum ether/ethyl acetate = 50：1 to 30:1) to afford the product as white solid (82.5 mg, 68% yield).

**1H NMR** (400 MHz, CDCl3) δ 8.25 (dd, *J =* 7.8, 1.6 Hz, 1H), 7.51 (td, *J =* 7.6, 1.6 Hz, 1H), 7.42 (td, *J =* 7.5, 1.3 Hz, 1H), 7.35 (d, *J =* 8.3 Hz, 1H), 7.31 – 7.18 (m, 6H), 6.92 (d, *J =* 10.3 Hz, 1H), 6.88 (dd, *J =* 8.4, 2.5 Hz, 1H), 6.38 (d, *J =* 10.3 Hz, 1H), 6.20 (d, *J =* 2.5 Hz, 1H), 5.79 – 5.74 (m, 1H), 3.75 (ddd, *J =* 8.6, 4.0, 2.2 Hz, 1H), 3.64 (s, 4H), 3.58 (ddd, *J =* 13.1, 8.4, 5.1 Hz, 1H), 2.60 – 2.52 (m, 2H), 2.37 – 2.26 (m, 1H), 1.73 – 1.58 (m, 1H).

**13C NMR** (100 MHz, CDCl3) 185.1, 159.7, 154.2, 149.0, 146.8, 141.6, 139.5, 138.5, 132.9, 132.2, 128.7, 128.3 (overlapped), 127.1, 127.1, 126.1, 125.9, 125.4, 125.2 (overlapped), 122.0, 115.0, 109.8, 58.4, 55.5, 55.4, 42.0, 29.3, 27.1

**HRMS (EI)**: m/z: [M]+ Calcd for, C29H24O2, 404.1776, found: 404.1773.

**M.P.**: 80.7-82.6 oC.

**[α]D20** = 75.0 (c = 0.2, CHCl3).

**HPLC conditions**: Daicel Chiralpak IB column (95:5 n-Hexane: 2-Propanol, 0.5 mL/min, 254 nm); tr (minor) = 19.1 min, tr (major) = 17.8 min; 90% *ee*).


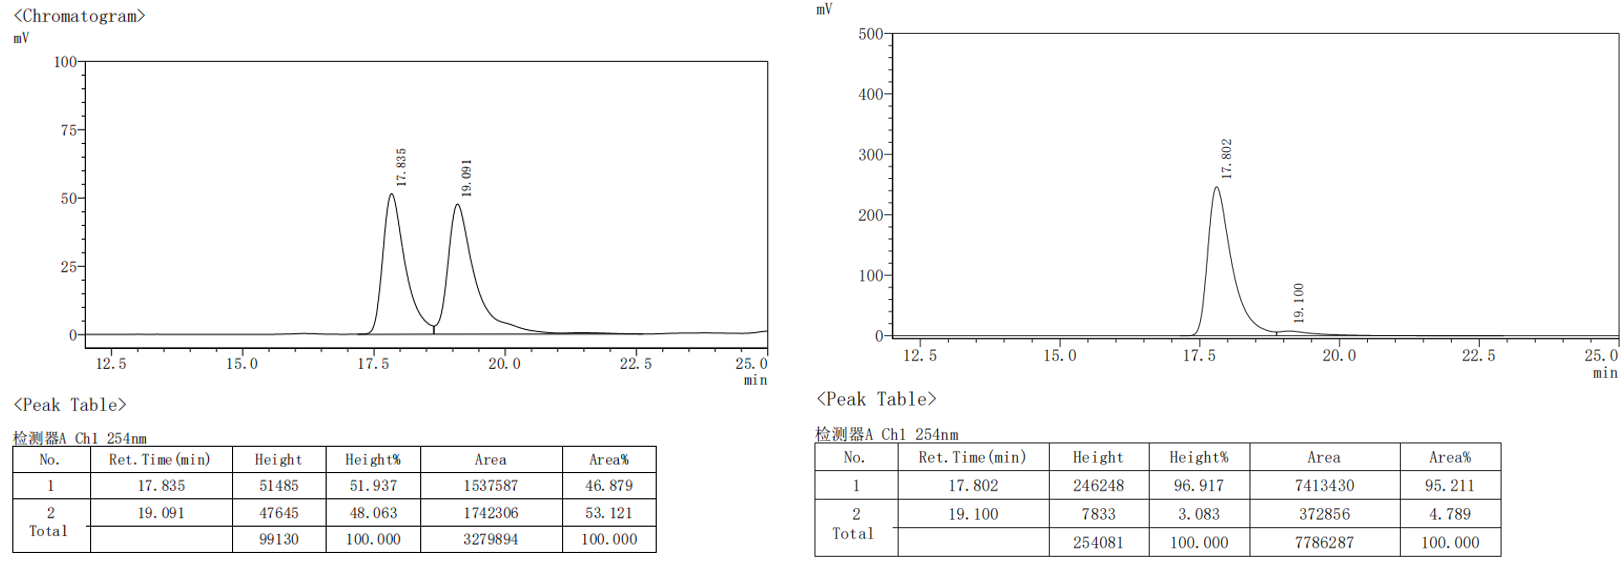
**(4a*R*,9*R*,9a*S*)-7-fluoro-2-phenyl-3,4,4a,9a-tetrahydro-4'H-spiro [fluorene-9,1'-naphthalen]-4'-one** (**3ag**).

The crude product was purified by column chromatography (petroleum ether/ethyl acetate = 50：1 to 30:1) to afford the product as white solid (77.6 mg, 66% yield).

**1H NMR** (400 MHz, CDCl3) δ 8.25 (dd, *J =* 7.9, 1.5 Hz, 1H), 7.51 (td, *J =* 7.6, 1.6 Hz, 1H), 7.42 (td, *J =* 7.5, 1.1 Hz, 1H), 7.34 – 7.16 (m, 7H), 6.88 (d, *J =* 10.3 Hz, 1H), 6.82 (t, *J =* 8.8 Hz, 1H), 6.45 (d, *J =* 10.2 Hz, 1H), 5.74 (s, 1H), 3.73 (dt, *J =* 6.7, 2.4 Hz, 1H), 3.66 (ddd, *J =* 13.2, 8.4, 4.9 Hz, 1H), 2.57 (ddt, *J =* 9.8, 4.8, 2.2 Hz, 2H), 2.39 – 2.20 (m, 1H), 1.67 (tdd, *J =* 12.8, 10.2, 6.0 Hz, 1H).

**13C NMR** (100 MHz, CDCl3) δ 184.9, 159.2 (d, *J =* 252.1 Hz), 151.7, 150.7 (d, *J =* 3.9 Hz), 148.3, 141.4, 138.6, 132.9, 131.6, 131.4, 131.3, 130.6, 130.6, 128.9, 128.3 (overlapped), 127.3 (d, *J =* 8.9 Hz), 127.1, 126.9, 126.3, 125.2 (overlapped), 121.1, 120.5 (d, *J =* 3.6 Hz), 114.6 (d, *J =* 19.7 Hz), 56.0 (d, *J =* 1.8 Hz), 55.4, 43.3, 29.0, 27.1.

**19F NMR** (376 MHz, CDCl3) δ -116.72.

**HRMS (EI)**: m/z: [M]+ Calcd for, C28H21FO, 392.1576, found: 392.1571.

**M.P.**: 80.3-81.7 oC.

**[α]D20** = 100.2 (c = 0.2, CHCl3).

**HPLC conditions:** Daicel Chiralpak IB column (95:5 n-Hexane: 2-Propanol, 0.5 mL/min, 254 nm); tr (minor) = 22.8 min, tr (major) = 21.3 min; 87% *ee*).


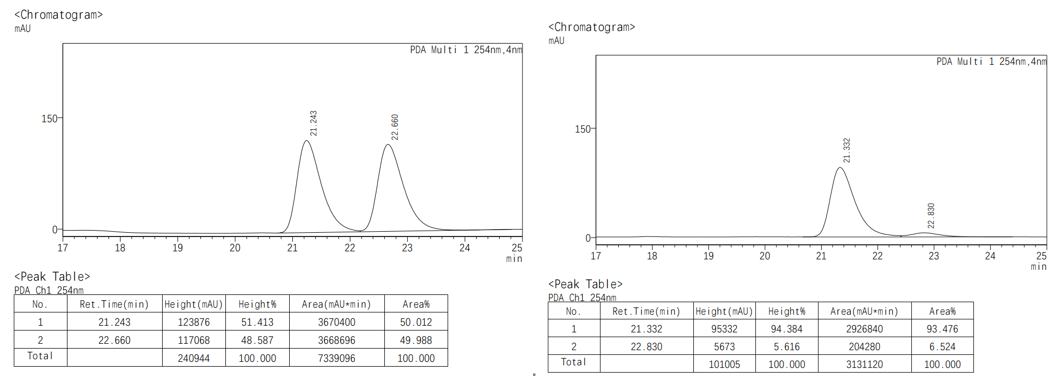


(**4a*R*,9*S*,9a*S*)-8-fluoro-2-phenyl-3,4,4a,9a-tetrahydro-4'H-spiro [fluorene-9,1'-naphthalen]-4'-one** (**3ah**).

The crude product was purified by column chromatography (petroleum ether/ethyl acetate = 50：1 to 30:1) to afford the product as white solid (74.1 mg, 63% yield).

**1H NMR** (400 MHz, CDCl3) δ 8.25 (dd, *J =* 7.9, 1.6 Hz, 1H), 7.53 (td, *J =* 7.6, 1.6 Hz, 1H), 7.45 (dd, *J =* 7.7, 1.2 Hz, 1H), 7.43 – 7.35 (m, 1H), 7.32 – 7.26 (m, 4H), 7.24 – 7.16 (m, 2H), 7.02 (td, *J =* 8.6, 2.5 Hz, 1H), 6.89 (d, *J =* 10.3 Hz, 1H), 6.44 – 6.36 (m, 2H), 5.78 – 5.72 (m, 1H), 3.81 – 3.73 (m, 1H), 3.60 (ddd, *J =* 13.3, 8.5, 5.1 Hz, 1H), 2.65 – 2.49 (m, 1H), 2.33 (ddd, *J =* 13.1, 9.0, 3.7 Hz, 1H), 1.75 – 1.60 (m, 1H).

**13C NMR** (100 MHz, CDCl3) δ184.9, 162.8 (d, *J* = 245.7 Hz), 153.4, 148.5, 147.6 (d, *J* = 7.3 Hz), 143.0, 141.6, 138.7, 133.1, 132.2, 128.6, 128.4 (overlapped), 127.3 (d, *J* = 7.4 Hz), 126.3, 126.2, 126.0, 125.9, 125.2 (overlapped), 121.7, 115.7 (d, *J* = 22.7 Hz), 112.3 (d, *J* = 22.3 Hz), 58.2, 55.5, 42.1, 29.2, 27.2.

**19F NMR** (376 MHz,) δ -116.72.

**HRMS (EI):** m/z: [M]+ Calcd for C28H21FO, 392.1576, found: 392.1573.

**M.P.**: 144.7-147.9 oC.

**[α]D20** = 90.4 (c = 0.2, CHCl3).

**HPLC conditions:** Daicel Chiralpak ID column (95:5 n-Hexane: 2-Propanol, 0.5 mL/min, 254 nm); tr (minor) = 19.1 min, tr (major) = 17.3 min; 93% ee).


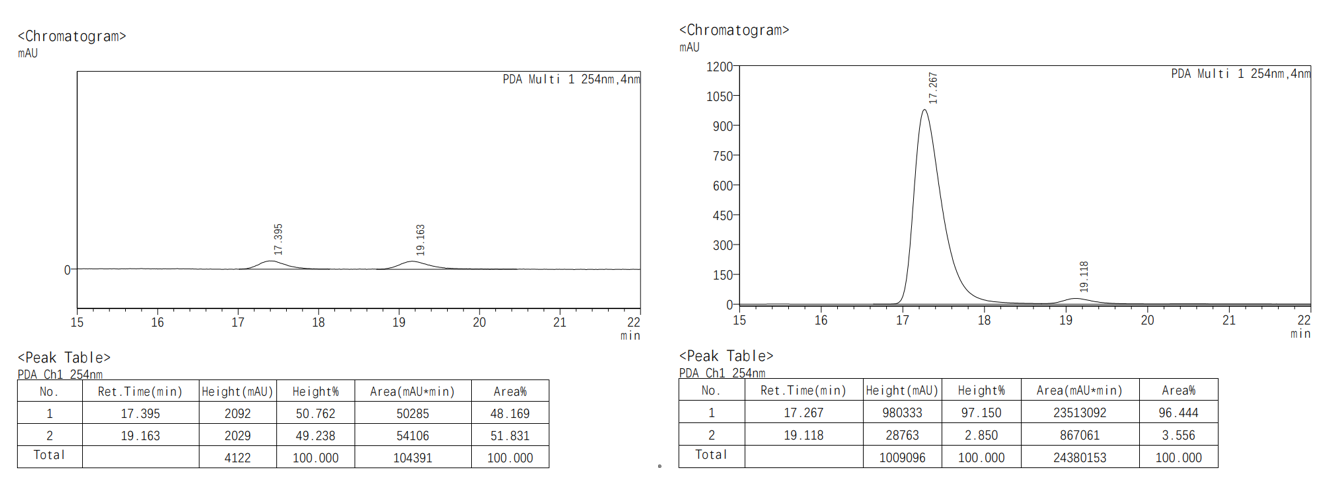


**(4a*R*,9*R*,9a*S*)-6,7-difluoro-2-phenyl-3,4,4a,9a-tetrahydro-4'H-spiro[fluorene-9,1'-naphthalen]-4'-one**. (**3ai**)

The crude product was purified by column chromatography (petroleum ether/ethyl acetate = 50：1 to 30:1) to afford the product as white solid (82.4 mg, 67% yield).

**1H NMR** (400 MHz, CDCl3) δ 8.25 (dd, *J =* 7.8, 1.6 Hz, 1H), 7.54 (td, *J =* 7.6, 1.6 Hz, 1H), 7.45 (td, *J =* 7.5, 1.3 Hz, 1H), 7.30 – 7.17 (m, 7H), 6.86 (d, *J =* 10.3 Hz, 1H), 6.51 (dd, *J =* 9.8, 7.4 Hz, 1H), 6.40 (d, *J =* 10.2 Hz, 1H), 5.73 (dd, *J =* 4.1, 2.0 Hz, 1H), 3.80 – 3.73 (m, 1H), 3.60 (ddd, *J =* 13.3, 8.5, 5.1 Hz, 1H), 2.66 – 2.49 (m, 2H), 2.31 (dtd, *J =* 13.1, 4.8, 3.2 Hz, 1H), 1.68 (tdd, *J =* 13.0, 10.6, 5.7 Hz, 1H).

**13C NMR** (100 MHz, CDCl3) δ 184.7, 153.0, 148.1, 141.4, 138.7, 133.1, 132.1, 128.4, 128.3, 127.5, 127.3, 126.3, 125.2, 121.3, 114.1, 113.9, 113.3, 113.1, 57.8, 55.4, 42.4, 28.9, 27.0.

**19F NMR** (376 MHz, CDCl3) δ -137.18 (d, *J =* 20.1 Hz), -137.53 (d, *J =* 20.1 Hz).

**HRMS (EI)**: m/z: [M]+ Calcd for C28H20F2O, 410.1482, found: 410.1478.

**M.P.**: 83.7-84.6 oC.

**[α]D20** = 121.5 (c = 0.2, CHCl3).

**HPLC conditions**: Daicel Chiralpak ID column (95:5 n-Hexane: 2-Propanol, 0.5 mL/min, 254 nm); tr (minor) = 22.1 min, tr (major) = 18.6 min; 92% *ee*).


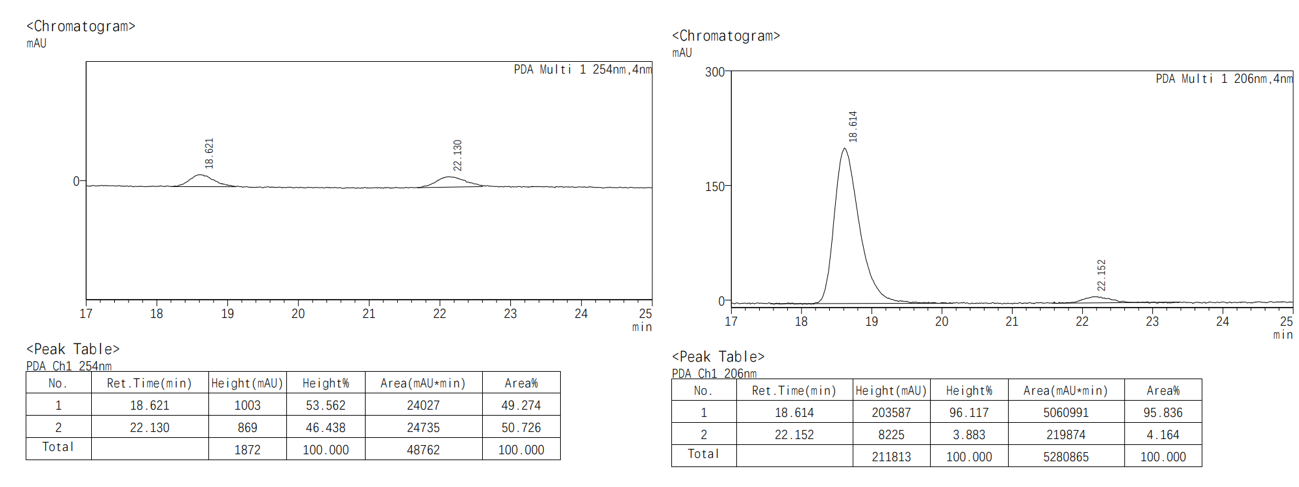


**(4a*R*,9*R*,9a*S*)-6-fluoro-2-(m-tolyl)-3,4,4a,9a-tetrahydro-4'H-spiro [fluorene-9,1' -naphthalen]-4'-one** (**3aj**).

The crude product was purified by column chromatography (petroleum ether/ethyl acetate = 50：1 to 30:1) to afford the product as white solid (76.8 mg, 63% yield).

**1H NMR** (400 MHz, CDCl3) δ 8.25 (dd, *J =* 7.8, 1.6 Hz, 1H), 7.52 (td, *J =* 7.5, 1.6 Hz, 1H), 7.43 (td, *J =* 7.5, 1.3 Hz, 1H), 7.22 – 7.08 (m, 5H), 7.04 (d, *J =* 7.4 Hz, 1H), 6.94 – 6.81 (m, 2H), 6.65 (dd, *J =* 8.5, 5.1 Hz, 1H), 6.38 (d, *J =* 10.2 Hz, 1H), 5.75 (dd, *J =* 4.2, 2.2 Hz, 1H), 3.78 (dt, *J =* 7.5, 3.4 Hz, 1H), 3.62 (ddd, *J =* 13.3, 8.5, 5.1 Hz, 1H), 2.66 – 2.45 (m, 2H), 2.37 – 2.33 (m, 1H), 2.32 (s, 3H), 1.70 (tdd, *J =* 13.0, 11.1, 5.2 Hz, 1H).

**13C NMR** (100 MHz, CDCl3) δ 1 185.0, 163.0 (d, *J* = 246.3 Hz), 153.9, 149.6 (d, *J* = 7.7 Hz), 149.0, 141.4, 141.0, 141.0, 138.6, 137.8, 132.9, 132.2, 128.5, 128.2, 128.0, 127.2, 126.8 (d, *J* = 9.1 Hz), 126.2, 125.9 (d, *J* = 4.3 Hz), 122.4, 121.4, 115.2 (d, *J* = 22.9 Hz), 111.6 (d, *J* = 21.9 Hz), 57.5, 55.4, 42.8 (d, *J* = 2.1 Hz), 28.8, 27.1, 21.5.

**HRMS (EI)**: m/z: [M]+ Calcd for, C29H23FO, 406.1733, found: 406.1727.

**M.P.**: 61.9-63.5 oC.

**[α]D20** = 77.9 (c = 0.2, CHCl3).

**HPLC conditions:** Daicel Chiralpak IB column (97:3 n-Hexane: 2-Propanol, 0.5 mL/min, 254 nm); tr (minor) = 18.3 min, tr (major) = 16.1 min; 94% *ee*).


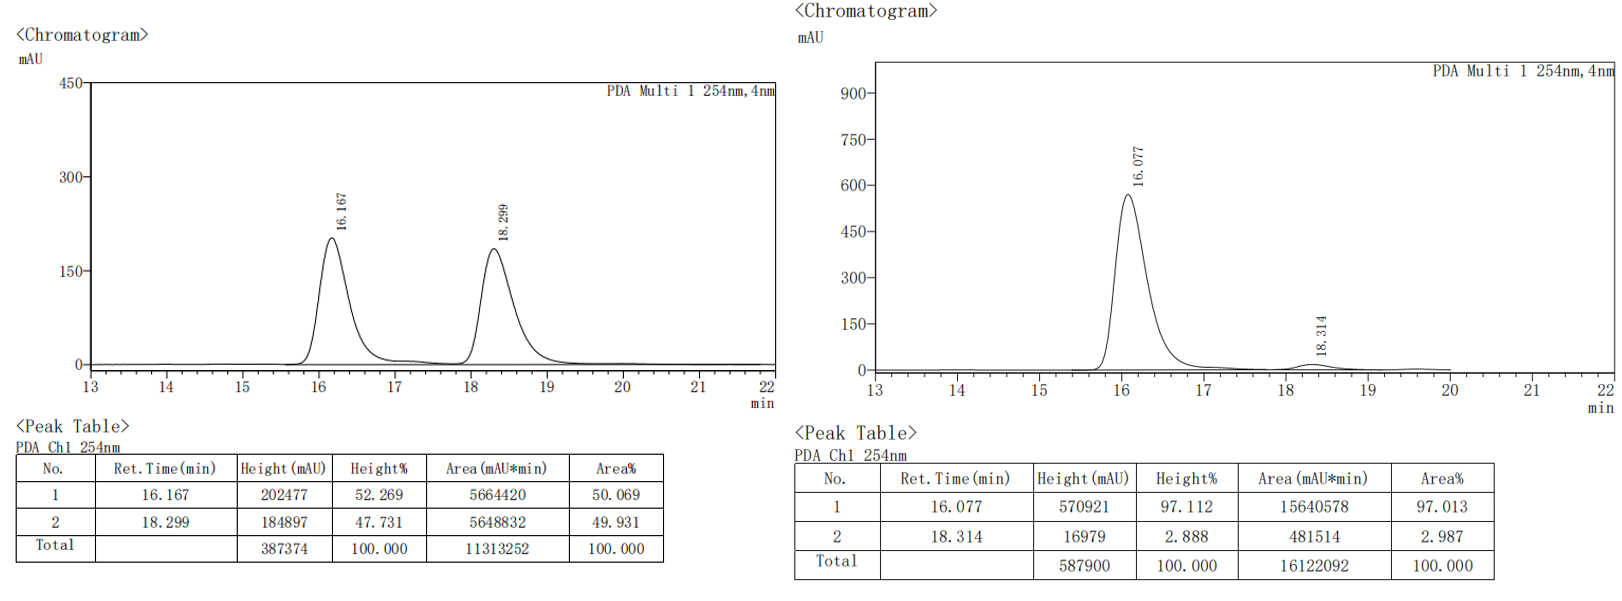


**(4a*R*,9*R*,9a*S*)-6-chloro-2-(m-tolyl)-3,4,4a,9a-tetrahydro-4'H-spiro [fluorene-9,1'-naphthalen]-4'-one** (**3ak**).

The crude product was purified by column chromatography (petroleum ether/ethyl acetate = 50：1 to 30:1) to afford the product as white solid (78.5 mg, 62% yield).

**1H NMR** (400 MHz, CDCl3) δ 8.25 (dd, *J =* 7.8, 1.6 Hz, 1H), 7.51 (td, *J =* 7.5, 1.6 Hz, 1H), 7.46 – 7.37 (m, 2H), 7.22 – 7.07 (m, 5H), 7.03 (d, *J =* 7.4 Hz, 1H), 6.87 (d, *J =* 10.3 Hz, 1H), 6.63 (d, *J =* 8.2 Hz, 1H), 6.38 (d, *J =* 10.3 Hz, 1H), 5.74 (dd, *J =* 4.3, 2.1 Hz, 1H), 3.92 – 3.72 (m, 1H), 3.62 (ddd, *J =* 13.2, 8.5, 5.1 Hz, 1H), 2.69 – 2.48 (m, 2H), 2.37 – 2.33 (m, 1H), 2.31 (s, 3H), 1.77 – 1.62 (m, 1H).

**13C NMR** (100 MHz, CDCl3) δ 184.9, 153.4, 149.2, 148.6, 144.1, 141.4, 138.7, 137.8, 134.1, 132.9, 132.2, 128.5, 128.2, 128.2, 128.0, 127.2, 126.7, 126.2, 126.1, 125.9, 125.0, 122.3, 121.2, 57.6, 55.1, 42.7, 28.8, 27.1, 21.4.

**HRMS (EI)**: m/z: [M]+ Calcd for, C29H23ClO, 422.1437, found: 422.1431.

**M.P.**: 82.3-91.4 oC.

**[α]D20** = 48.5 (c = 0.2, CHCl3).

**HPLC conditions:** Daicel Chiralpak IB (97:3 n-Hexane: 2-Propanol, 0.5 mL/min, 254 nm); tr (minor) = 19.1 min, tr (major) = 15.9 min; 90% *ee*).


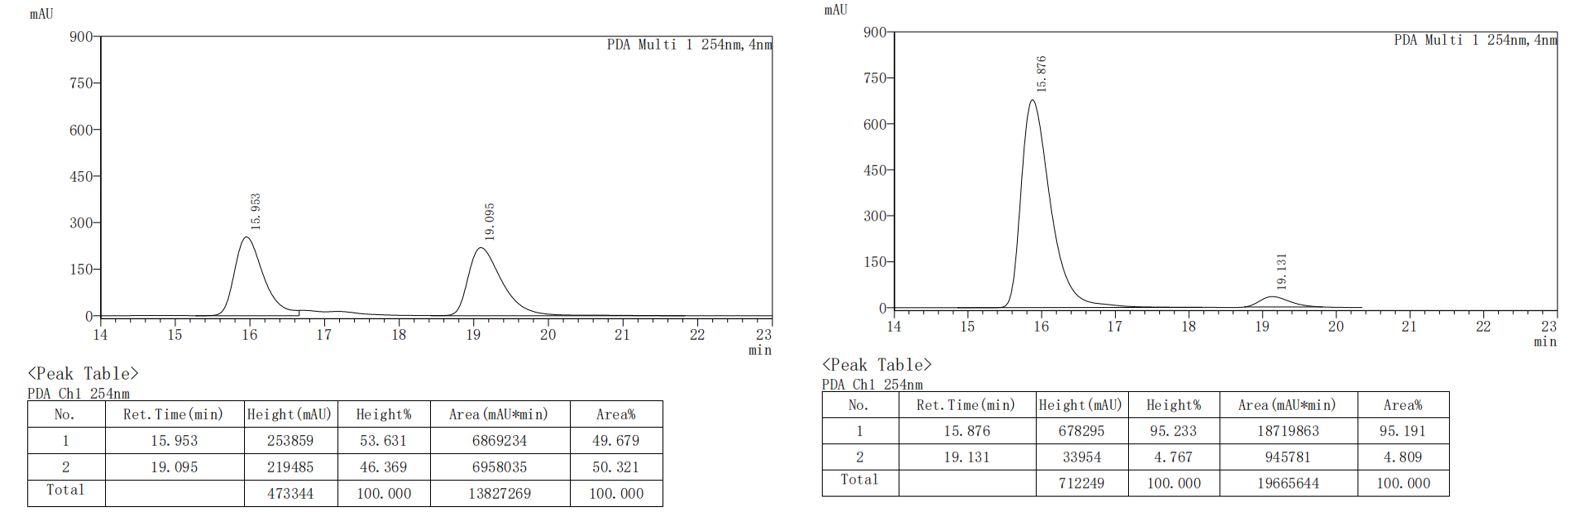


**(4a*R*,9*R*,9a*S*)-6-methyl-2-(m-tolyl)-3,4,4a,9a-tetrahydro-4'H-spiro[fluorene-9,1'-naphthalen]-4'-one** (**3al**).

The crude product was purified by column chromatography (petroleum ether/ethyl acetate = 50：1 to 30:1) to afford the product as white solid (82.0 mg, 68% yield).

**1H NMR** (400 MHz, CDCl3) δ 8.25 (dd, 1H), 7.48 (t, *J =* 7.6 Hz, 1H), 7.40 (t, *J =* 7.5 Hz, 1H), 7.23 (dd, *J =* 12.2, 9.4 Hz, 2H), 7.16 (t, *J =* 7.6 Hz, 1H), 7.10 (d, *J =* 7.2 Hz, 2H), 7.02 (d, *J =* 7.4 Hz, 1H), 6.97 (d, *J =* 7.8 Hz, 1H), 6.91 (dd, *J =* 10.2, 1.5 Hz, 1H), 6.58 (d, *J =* 7.7 Hz, 1H), 6.36 (dd, *J =* 10.2, 1.8 Hz, 1H), 5.77 (dd, *J =* 4.0, 2.2 Hz, 1H), 3.74 (dt, *J =* 7.2, 3.2 Hz, 1H), 3.59 (ddd, *J =* 13.3, 8.3, 5.2 Hz, 1H), 2.65 – 2.44 (m, 2H), 2.38 (s, 3H), 2.36 – 2.33 (m, 1H), 2.31 (s, 3H), 1.68 (qd, *J =* 12.4, 5.1 Hz, 1H).

**13C NMR** (100 MHz, CDCl3) δ 185.2, 154.4, 149.4, 147.5, 142.5, 141.6, 138.4, 138.1, 137.7, 132.7, 132.2, 128.8, 128.6, 128.1, 127.9, 126.9, 126.0, 125.9, 125.5, 125.3, 125.1, 122.3, 121.8, 57.9, 55.1, 42.7, 29.1, 27.2, 21.4, 21.3.

**HRMS (EI)**: m/z: [M]+ Calcd for, C30H26O, 402.1984, found: 402.1978.

**M.P.**: 104.7-105.9 oC.

**[α]D20** = 64.2 (c = 0.2, CHCl3).

**HPLC conditions:** Daicel Chiralpak IB column (97:3 n-Hexane: 2-Propanol, 0.5 mL/min, 254 nm); tr (minor) = 14.9 min, tr (major) = 13.8 min; 87% *ee*).


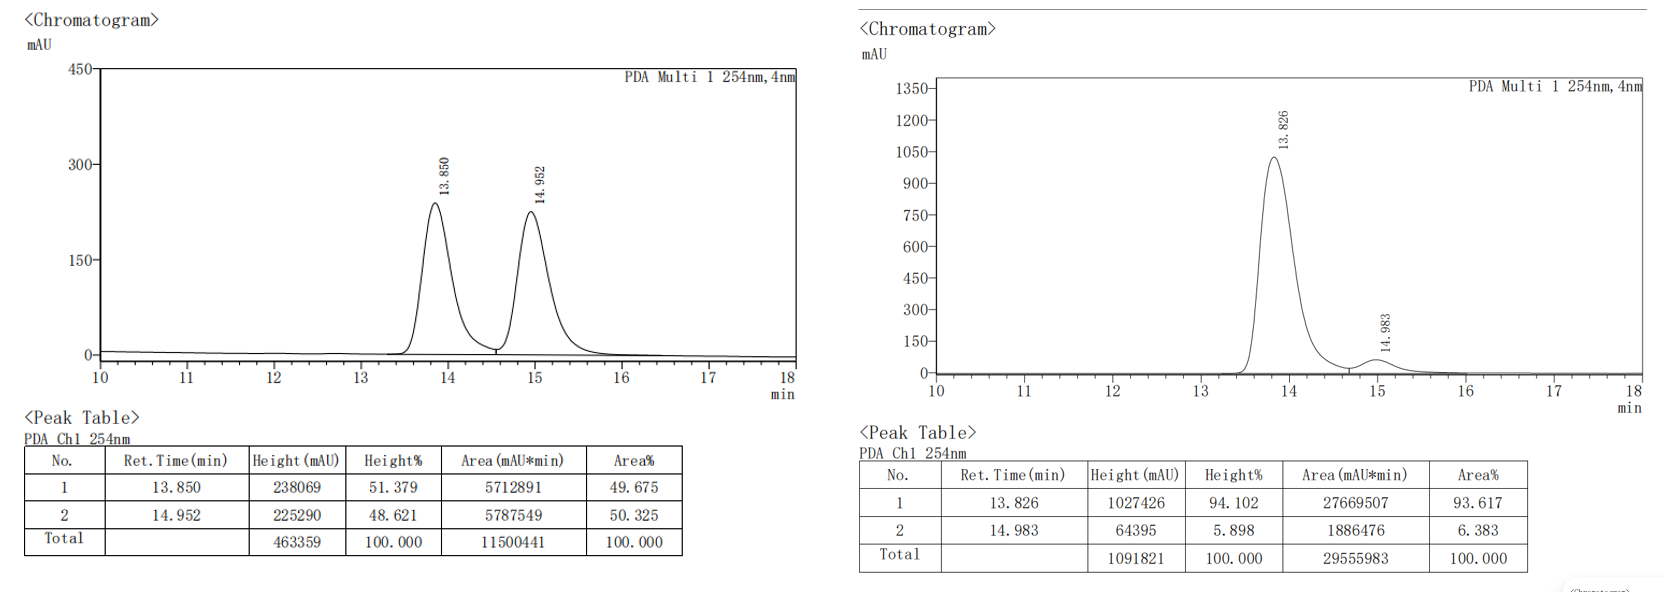


**(4a*R*,9*R*,9a*S*)-6-fluoro-2-(m-tolyl)-3,4,4a,9a-tetrahydro-4'H-spiro[fluorene-9,1'-naphthalen]-4'-one** (**3am**)

The crude product was purified by column chromatography (petroleum ether/ethyl acetate = 50：1 to 30:1) to afford the product as white solid (84.0 mg, 69% yield).;

**1H NMR** (400 MHz, CDCl3) δ 8.25 (dd, *J =* 7.9, 1.5 Hz, 1H), 7.57 – 7.48 (m, 0H), 7.44 (t, *J =* 7.6 Hz, 1H), 7.39 (dd, *J =* 8.4, 5.1 Hz, 1H), 7.23 – 7.14 (m, 1H), 7.12 – 7.07 (m, 2H), 7.05 – 6.97 (m, 1H), 6.89 (d, *J =* 10.2 Hz, 1H), 5.74 (dd, *J =* 4.3, 2.1 Hz, 1H), 3.77 (dt, *J =* 7.4, 3.3 Hz, 1H), 3.59 (ddd, *J =* 13.2, 8.4, 5.1 Hz, 1H), 2.66 – 2.47 (m, 1H), 2.36 – 2.32 (m, 1H), 2.31 (s, 3H), 1.77 – 1.60 (m, 1H).

**13C NMR** (100 MHz, CDCl3) δ 184.9, 162.7 (d, *J* = 245.7 Hz), 153.3, 148.4, 147.5 (d, *J* = 7.3 Hz), 142.9, 142.9, 141.5, 138.7, 137.8, 133.0, 132.2, 128.5, 128.2, 128.0, 127.3, 126.2 (d, *J* = 8.2 Hz), 125.9, 125.8, 122.4, 121.3, 115.6 (d, *J* = 22.5 Hz), 112.2 (d, *J* = 22.3 Hz), 58.1, 55.4, 42.1, 29.2, 27.1, 21.4.

**19F NMR** (376 MHz, CDCl3) δ -114.32.

**HRMS (EI):** m/z: [M]+ Calcd for C29H23FO, 406.1733, found: 406.1727.

**M.P.**: 75.0-76.8 oC.

**[α]D20** = 97.2 (c = 0.2, CHCl3).

**HPLC conditions:** Daicel Chiralpak IB column (97:3 n-Hexane: 2-Propanol, 0.5 mL/min, 254 nm); tr (minor) = 17.7 min, tr (major) = 15.9 min; 91% *ee*).


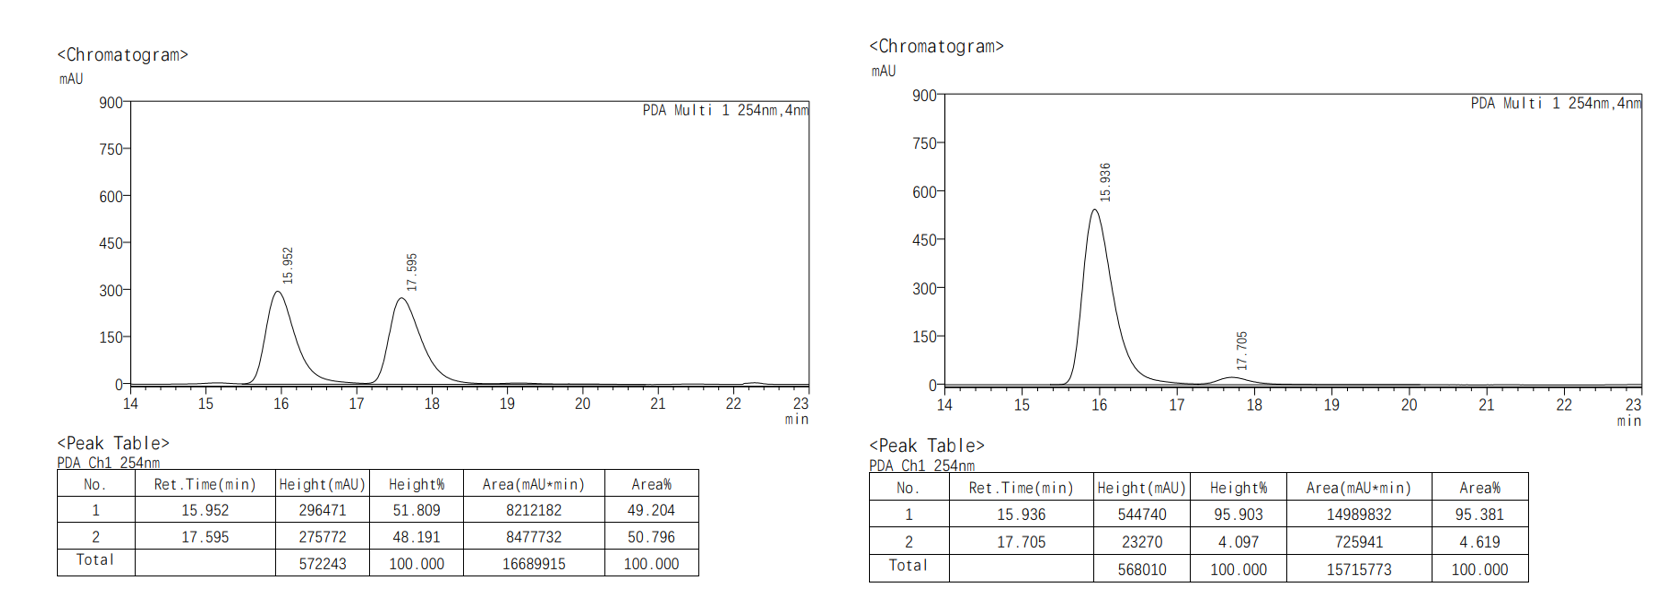


**(4a*R*,9*R*,9a*S*)-7-methyl-2-(m-tolyl)-3,4,4a,9a-tetrahydro-4'H-spiro[fluorene-9,1'-naphthalen]-4'-one** (**3an**).

The crude product was purified by column chromatography (petroleum ether/ethyl acetate = 50：1 to 30:1) to afford the product as white solid (85.6 mg, 71% yield).

**1H NMR** (400 MHz, CDCl3) δ 8.26 (d, *J =* 7.9 Hz, 1H), 7.51 (t, *J =* 7.6 Hz, 1H), 7.42 (t, *J =* 7.5 Hz, 1H), 7.33 (d, *J =* 7.7 Hz, 1H), 7.27 – 7.20 (m, 2H), 7.18 – 7.06 (m, 4H), 7.03 (d, *J =* 7.4 Hz, 1H), 6.92 (d, *J =* 10.3 Hz, 1H), 6.49 (s, 1H), 6.37 (d, *J =* 10.2 Hz, 1H), 5.77 (s, 1H), 3.83 – 3.70 (m, 1H), 3.66 – 3.56 (m, 1H), 2.70 – 2.47 (m, 2H), 2.31 (m, 4H), 2.22 (s, 3H), 1.75 – 1.55 (m, 1H).

**13C NMR** (100 MHz, CDCl3) δ 185.2, 154.4, 149.3, 145.5, 144.5, 141.6, 138.5, 137.7, 137.6, 132.8, 132.2, 129.2, 128.7, 128.1, 127.9, 126.9, 126.0, 125.9, 125.8, 125.6, 124.5, 122.3, 121.8, 58.2, 55.1, 42.4, 29.1, 27.2, 21.4, 21.1.

**HRMS (EI)**: m/z: [M]+ Calcd for, C30H26O, 402.1984, found: 402.1978.

**M.P.**: 70.3-71.3 oC.

**[α]D20** = 88.5 (c = 0.2, CHCl3).

**HPLC conditions:** Daicel Chiralpak IB (99:1 n-Hexane: 2-Propanol, 0.5 mL/min, 254 nm); tr (minor) = 24.4 min, tr (major) = 25.7 min; 90% *ee*).


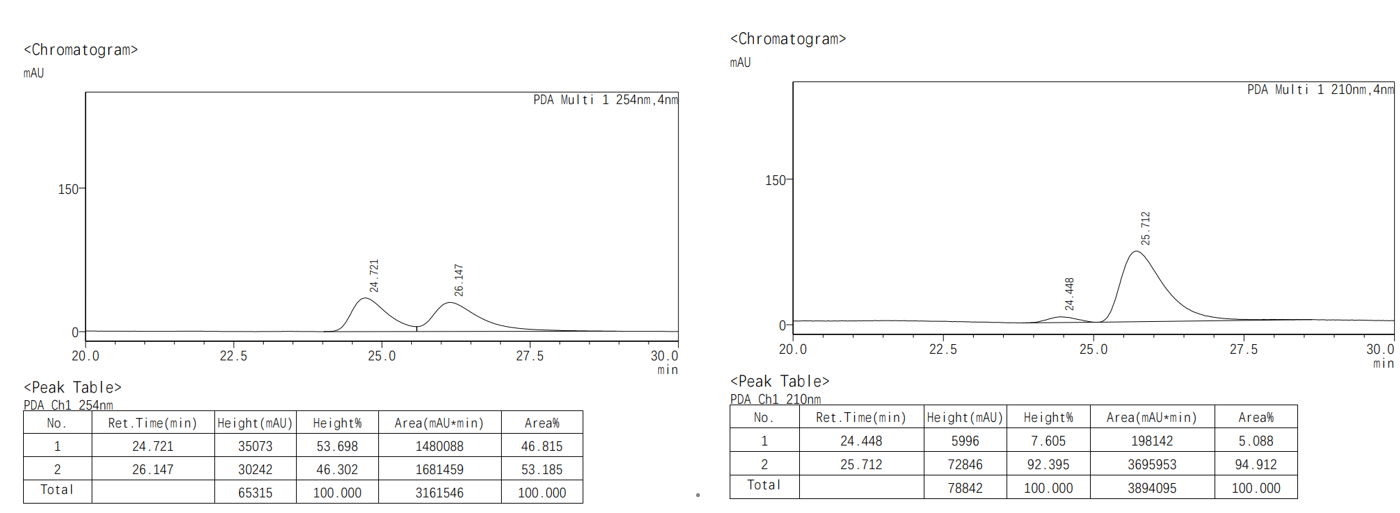


**(4aR,9R,9aS)-2-(4-fluorophenyl)-6-methoxy-3,4,4a,9a-tetrahydro-4'H-spiro [fluorene-9,1'-naphthalen]-4'-one** (**3ba**)

The crude product was purified by column chromatography (petroleum ether/ethyl acetate = 50：1 to 30:1) to afford the product as white solid (84.8 mg, 67% yield).

**1H NMR** (400 MHz, CDCl3) δ 8.25 (dd, *J =* 7.9, 1.5 Hz, 1H), 7.55 – 7.47 (m, 1H), 7.46 – 7.38 (m, 1H), 7.25 (qd, *J =* 6.7, 3.3 Hz, 4H), 7.04 – 6.93 (m, 3H), 6.90 (d, *J =* 10.3 Hz, 1H), 6.73 (dd, *J =* 8.4, 2.5 Hz, 1H), 6.62 (d, *J =* 8.4 Hz, 1H), 6.36 (d, *J =* 10.3 Hz, 1H), 5.71 (dd, *J =* 3.7, 1.9 Hz, 1H), 3.84 (s, 3H), 3.74 (ddt, *J =* 8.5, 4.1, 1.9 Hz, 1H), 3.60 (ddd, *J =* 13.2, 8.5, 5.0 Hz, 1H), 2.64 – 2.49 (m, 2H), 2.40 – 2.30 (m, 2H), 1.77 – 1.62 (m, 1H).

**13C NMR** (100 MHz, CDCl3) δ 185.2, 162.0 (d, *J* = 247.4 Hz), 160.1, 154.5, 149.4, 148.8, 137.7, 137.4, 137.2, 132.8, 132.2, 128.6, 127.0, 126.8, 126.7, 126.1, 126.1, 125.5, 121.9, 115.1, 114.9, 114.0, 109.8, 57.5, 55.4, 55.4, 42.7, 28.9, 27.3

**19F NMR** (376 MHz, CDCl3) δ -115.40.

**HRMS (EI)**: m/z: [M]+ Calcd for, C29H23FO2, 422.1682, found: 422.1679.

**M.P.**: 73.7-77.0 oC.

**[α]D20** = 31.1 (c = 0.2, CHCl3).

**HPLC conditions:** Daicel Chiralpak IB column (95:5 n-Hexane: 2-Propanol, 0.5 mL/min, 254 nm); tr (minor) = 20.3 min, tr (major) = 18.8 min; 96% *ee*).


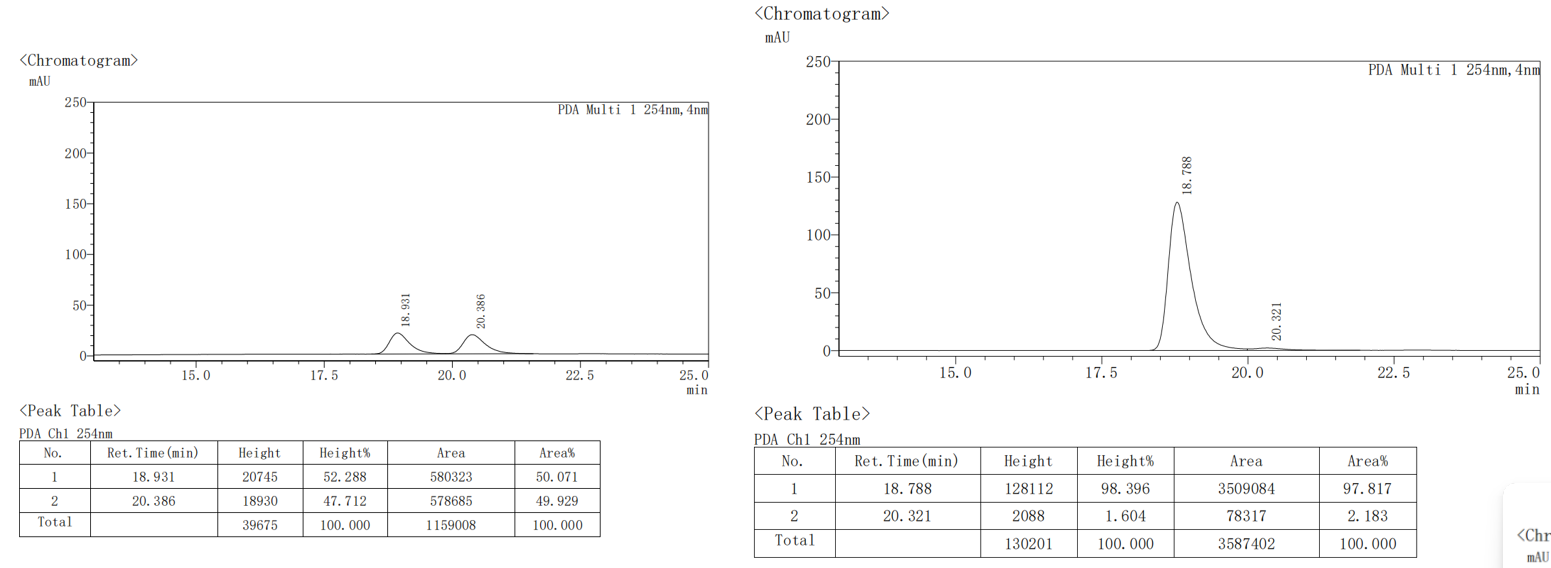


**(4a*R*,9*R*,9a*S*)-2-(3-fluorophenyl)-6-methoxy-3,4,4a,9a-tetrahydro-4'H-spiro[flu-orene-9,1'-naphthalen]-4'-one** (**3bb**).

The crude product was purified by column chromatography (petroleum ether/ethyl acetate = 50：1 to 30:1) to afford the product as white solid (99.6 mg, 78% yield).

**1H NMR** (400 MHz, CDCl3) δ 8.24 (d, *J =* 7.7 Hz, 1H), 7.50 (t, *J =* 7.6 Hz, 1H), 7.41 (t, *J =* 7.6 Hz, 1H), 7.27 – 7.20 (m, 2H), 7.07 (d, *J =* 7.8 Hz, 1H), 6.98 (td, *J =* 5.7, 5.1, 2.7 Hz, 2H), 6.94 – 6.85 (m, 2H), 6.73 (d, *J =* 8.5 Hz, 1H), 6.60 (d, *J =* 8.4 Hz, 0H), 6.36 (d, *J =* 8.5 Hz, 1H), 5.82 – 5.77 (m, 1H), 3.83 (d, *J =* 1.8 Hz, 3H), 3.76 – 3.72 (m, 1H), 3.67 – 3.54 (m, 1H), 2.58 – 2.54 (m, 2H), 2.35 (dt, *J =* 13.8, 4.4 Hz, 1H), 1.77 – 1.65 (m, 1H).

**13C NMR** (100 MHz, CDCl3) δ 185.1, 162.8 (d, *J* = 245.3 Hz), 160.1, 154.3, 149.3, 148.7, 143.9 (d, *J* = 7.5 Hz), 137.4, 137.2, 132.8, 132.2, 129.7 (d, *J* = 8.4 Hz), 128.6, 127.0, 126.1 (d, *J* = 3.3 Hz), 125.6, 123.2, 120.8, 120.8, 114.1, 113.8 (d, *J* = 21.4 Hz), 112.1 (d, *J* = 21.9 Hz), 109.8, 57.5, 55.4, 55.3, 42.8, 28.8, 27.0.

**19F NMR** (376 MHz, CDCl3) δ -113.36.

**HRMS (EI)**: m/z: [M]+ Calcd for, C29H23FO2, 422.1682, found: 422.1677.

**M.P.**: 94.3-97.5 oC.

**[α]D20** = 41.3 (c = 0.2, CHCl3).

**HPLC conditions:** Daicel Chiralpak IB column (90:10 n-Hexane: 2-Propanol, 0.5 mL/min, 254 nm); tr (minor) = 18.2 min, tr (major) = 16.1 min; 94% ee).


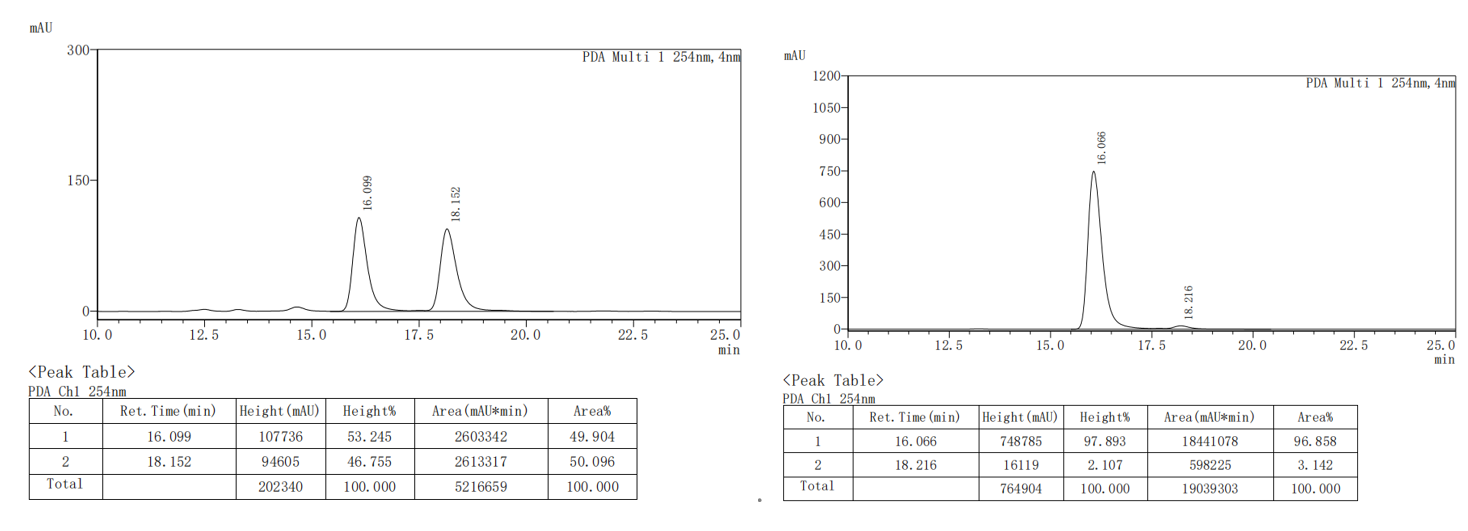


**(4a*R*,9*R*,9a*S*)-2-(4-chlorophenyl)-6-methoxy-3,4,4a,9a-tetrahydro-4'H-spiro [fluorene-9,1'-naphthalen]-4'-one (3bc).**

The crude product was purified by column chromatography (petroleum ether/ethyl acetate = 50：1 to 30:1) to afford the product as white solid (88.0 mg, 67% yield).

**1H NMR** (400 MHz, CDCl3) δ 8.24 (d, *J =* 7.8 Hz, 1H), 7.50 (t, *J =* 7.7 Hz, 1H), 7.41 (t, *J =* 7.5 Hz, 1H), 7.23 (d, *J =* 7.0 Hz, 5H), 6.97 (s, 1H), 6.89 (d, *J =* 8.5 Hz, 1H), 6.72 (d, *J =* 2.2 Hz, 1H), 6.62 (s, 1H), 6.35 (d, *J =* 8.4 Hz, 1H), 5.95 – 5.57 (m, 1H), 3.84 (s, 3H), 3.78 – 3.69 (m, 1H), 3.65 – 3.54 (m, 1H), 2.61 – 2.46 (m, 2H), 2.40 – 2.19 (m, 1H), 1.76 – 1.60 (m, 1H).

**13C NMR** (100 MHz, CDCl3) δ 185.1, 160.1, 154.5, 149.3, 148.8, 140.0, 137.3, 137.2, 132.9, 132.2, 128.6, 128.4 (overlapped), 127.0, 126.5 (overlapped), 126.2, 126.1, 125.6, 122.6, 114.1, 109.8, 57.5, 55.4, 55.4, 42.7, 28.9, 27.1.

**HRMS (EI)**: m/z: [M]+ Calcd for, C29H23ClO2, 438.1387, found: 438.1381.

**M.P.**: 115.8-116.6 oC.

**[α]D20** = 48.5 (c = 0.2, CHCl3).

**HPLC conditions:** Daicel Chiralpak IB column (95:5 n-Hexane: 2-Propanol, 0.5 mL/min, 254 nm); tr (minor) = 22.7 min, tr (major) = 20.6 min; 93% *ee*).


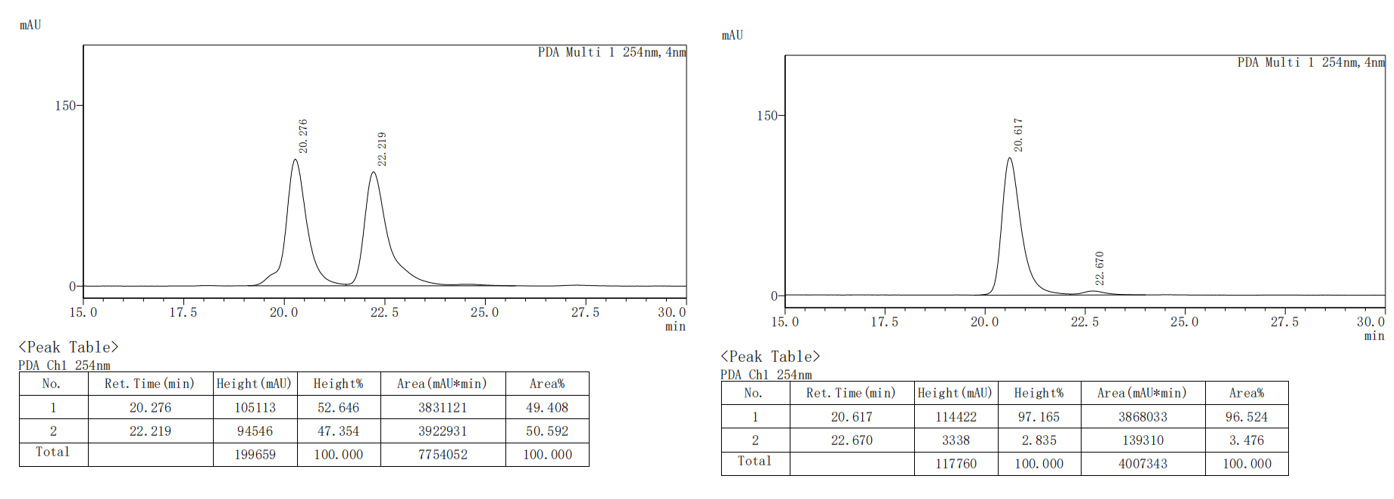


**(4a*R*,9*R*,9a*S*)-6-methoxy-2-(p-tolyl)-3,4,4a,9a-tetrahydro-4'H-spiro[fluor-ene-9,1'-naphthalen]-4'-one (3bd).**

The crude product was purified by column chromatography (petroleum ether/ethyl acetate = 50：1 to 30:1) to afford the product as white solid (83.6 mg, 66% yield).

**1H NMR** (400 MHz, CDCl3) δ 8.24 (d, *J =* 7.8 Hz, 1H), 7.50 (t, *J =* 7.5 Hz, 1H), 7.41 (t, *J =* 7.5 Hz, 1H), 7.21 (dd, *J =* 11.9, 7.8 Hz, 3H), 7.08 (d, *J =* 7.8 Hz, 2H), 6.97 (d, *J =* 2.4 Hz, 1H), 6.90 (d, *J =* 10.2 Hz, 1H), 6.71 (dd, *J =* 8.5, 2.1 Hz, 1H), 6.60 (d, *J =* 8.4 Hz, 1H), 6.35 (d, *J =* 10.1 Hz, 1H), 5.90 – 5.68 (m, 1H), 3.83 (s, 3H), 3.79 – 3.69 (m, 1H), 3.59 (ddd, *J =* 13.3, 8.4, 5.1 Hz, 1H), 2.56 (tdd, *J =* 16.8, 13.3, 3.2 Hz, 2H), 2.36 – 2.33 (m, 1H), 2.31 (s, 3H), 1.69 (dd, *J =* 12.7, 5.7 Hz, 1H).

**13C NMR** (100 MHz, CDCl3) δ 185.2, 160.0, 154.7, 149.5, 149.0, 138.7, 138.1, 137.3, 136.9, 132.8, 132.2, 128.9 (overlapped), 128.6, 126.9, 126.2, 126.1, 125.5, 125.1 (overlapped), 121.1, 114.0, 109.8, 57.6, 55.5 (overlapped), 42.9, 29.0, 27.1, 21.0.

**HRMS (EI):** m/z: [M]+ Calcd for C30H26O2, 418.1933, found: 418.1927.

**M.P.**: 198.5-200.1 oC.

**[α]D20** = 31.2 (c = 0.2, CHCl3).

**HPLC conditions:** Daicel Chiralpak ID column (90:10 n-Hexane: 2-Propanol, 0.5 mL/min, 254 nm); tr (minor) = 33.1 min, tr (major) = 31.0 min; 97% *ee*).


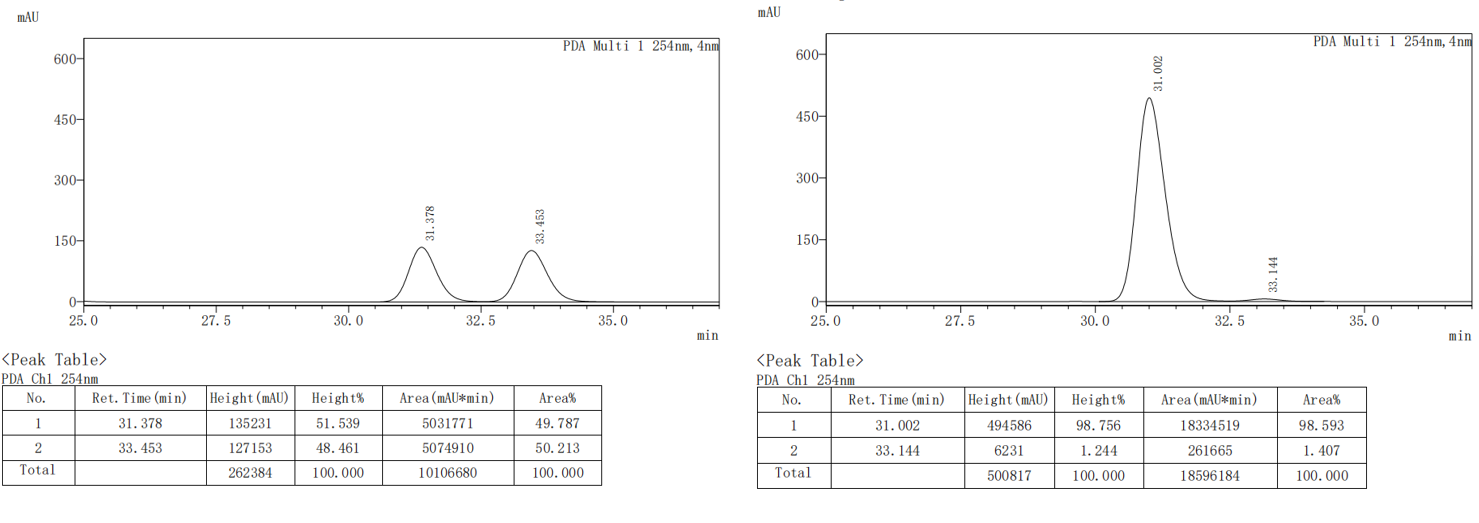


**(4a*R*,9*R*,9a*S*)-6-methoxy-2-(m-tolyl)-3,4,4a,9a-tetrahydro-4'H-spiro[fluor-ene-9,1'-naphthalen]-4'-one (3be).**

The crude product was purified by column chromatography (petroleum ether/ethyl acetate = 50：1 to 30:1) to afford the product as white solid (106.6 mg, 85% yield).

**1H NMR** (400 MHz, CDCl3) δ 8.24 (dd, *J =* 7.9, 1.6 Hz, 1H), 7.50 (td, *J =* 7.5, 1.6 Hz, 1H), 7.41 (td, *J =* 7.5, 1.3 Hz, 1H), 7.25 – 7.20 (m, 1H), 7.17 (dd, *J =* 8.4, 7.3 Hz, 1H), 7.17 – 7.07 (m, 2H), 7.03 (d, *J =* 7.4 Hz, 1H), 6.97 (d, *J =* 2.5 Hz, 1H), 6.91 (d, *J =* 10.2 Hz, 1H), 6.72 (dd, *J =* 8.4, 2.5 Hz, 1H), 6.60 (d, *J =* 8.4 Hz, 1H), 6.35 (d, *J =* 10.2 Hz, 1H), 5.76 (dd, *J =* 4.3, 2.2 Hz, 1H), 3.83 (s, 3H), 3.75 (dt, *J =* 7.5, 3.3 Hz, 1H), 3.60 (ddd, *J =* 13.2, 8.5, 5.1 Hz, 1H), 2.66 – 2.52 (m, 2H), 2.35 (q, *J =* 3.2, 1.8 Hz, 1H), 2.31 (s, 3H), 1.70 (tdd, *J =* 12.9, 11.1, 5.2 Hz, 1H).

**13C NMR** (100 MHz, CDCl3) δ 185.2, 160.1, 154.6, 149.5, 149.0, 141.6, 138.5, 137.8, 137.3, 132.8, 132.2, 128.6, 128.2, 127.9, 126.9, 126.2, 126.1, 125.9, 125.5, 122.4, 121.8, 114.0, 109.8, 57.5, 55.4, 55.4, 42.9, 29.0, 27.2, 21.5.

**HRMS (EI)**: m/z: [M]+ Calcd for C30H26O2, 418.1933, found: 418.1927.

**M.P.**: 65.4-66.3 oC.

**[α]D20** = 29.7 (c = 0.2, CHCl3).

**HPLC conditions:** Daicel Chiralpak IB column (90:10 n-Hexane: 2-Propanol, 0.5 mL/min, 254 nm); tr (minor) = 13.6 min, tr (major) = 12.7 min; 95% *ee*).


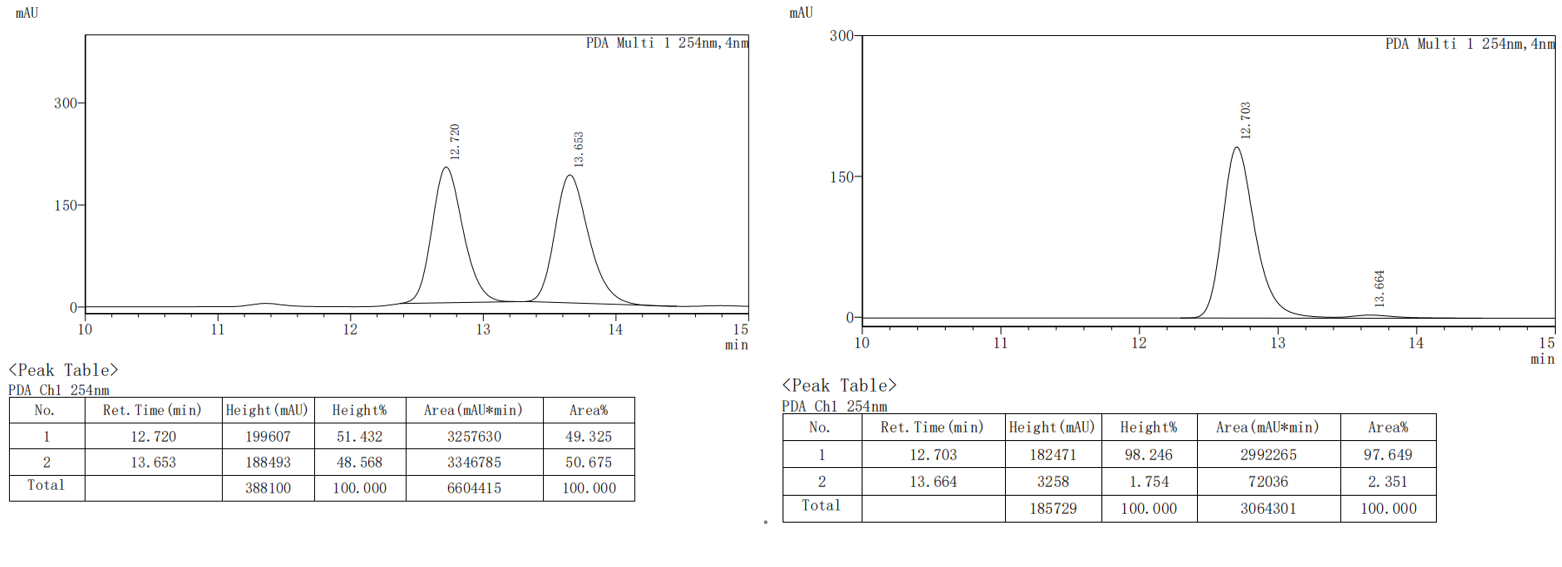


**(4a*R*,9*R*,9a*S*)-6-methoxy-2-(o-tolyl)-3,4,4a,9a-tetrahydro-4'H-spiro[fluorene-9,1'-naphthalen]-4'-one (3bf).**

The crude product was purified by column chromatography (petroleum ether/ethyl acetate = 50：1 to 30:1) to afford the product as white solid (86.7 mg, 69% yield).

**1H NMR** (400 MHz, CDCl3) δ 7.99 (dd, *J =* 8.0, 1.5 Hz, 1H), 7.29 (td, *J =* 7.5, 1.5 Hz, 1H), 7.18 (td, *J =* 7.5, 1.3 Hz, 1H), 7.04 (d, *J =* 8.1 Hz, 1H), 7.00 – 6.84 (m, 3H), 6.84 – 6.74 (m, 3H), 6.54 (dd, *J =* 8.5, 2.5 Hz, 1H), 6.43 (d, *J =* 8.4 Hz, 1H), 6.16 (d, *J =* 10.3 Hz, 1H), 5.13 (dd, *J =* 3.9, 2.4 Hz, 1H), 3.65 (s, 3H), 3.54 (dt, *J =* 8.7, 3.4 Hz, 1H), 3.42 (ddd, *J =* 13.2, 8.4, 4.8 Hz, 1H), 2.28 (dddd, *J =* 19.9, 11.3, 4.9, 2.5 Hz, 1H), 2.15 – 2.07 (m, 2H), 2.03 (s, 3H), 1.61 – 1.47 (m, 1H).

**13C NMR** (100 MHz, CDCl3) 185.1, 160.1, 154.6, 149.4, 149.1, 143.5, 140.7, 137.4, 134.6, 132.7, 132.2, 130.0, 128.6, 127.9, 126.9, 126.8, 126.2, 126.0, 125.6, 125.6, 123.3, 114.0, 109.9, 57.4, 55.5, 55.2, 42.8, 29.6, 29.0, 20.0.

**HRMS (EI)**: m/z: [M]+ Calcd for C30H26O2, 418.1933, found: 418.1927.

**M.P.**: 78.0-83.0 oC.

**[α]D20** = 85.3 (c = 0.2, CHCl3).

**HPLC conditions:** Daicel Chiralpak IF column (90:10 n-Hexane: 2-Propanol, 0.5 mL/min, 254 nm); tr (minor) = 27.8 min, tr (major) = 29.1 min; 99% *ee*).


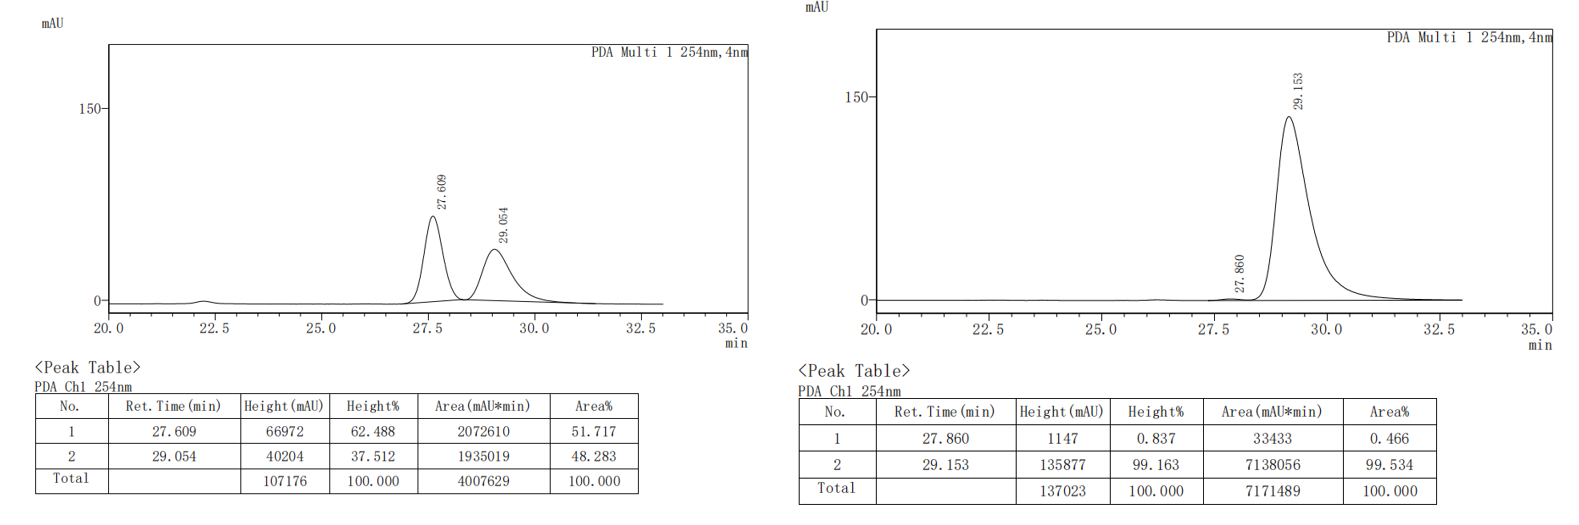


**(4a*R*,9*R*,9a*S*)-2-(3,5-dimethylphenyl)-3,4,4a,9a-tetrahydro-4'H-spiro[fluorene-9,1'-naphthalen]-4'-one (3bg)**.

The crude product was purified by column chromatography (petroleum ether/ethyl acetate = 50：1 to 30:1) to afford the product as white solid (89.2 mg, 74% yield).

**1H NMR** (400 MHz, CDCl3) δ 8.26 (dd, *J =* 7.8, 1.6 Hz, 1H), 7.53 – 7.37 (m, 3H), 7.31 (t, *J =* 7.5 Hz, 1H), 7.14 (t, *J =* 7.5 Hz, 1H), 6.95 – 6.88 (m, 3H), 6.86 (s, 1H), 6.68 (d, *J =* 7.7 Hz, 1H), 6.37 (d, *J =* 10.2 Hz, 1H), 5.75 (dd, *J =* 4.2, 2.2 Hz, 1H), 3.75 (dt, *J =* 7.5, 3.4 Hz, 1H), 3.63 (ddd, *J =* 13.3, 8.5, 5.0 Hz, 1H), 2.73 – 2.48 (m, 2H), 2.38 – 2.30 (m, 1H), 2.27 (s, 6H), 1.76 – 1.61 (m, 1H).

**13C NMR** (100 MHz, CDCl3) δ 185.1, 154.1, 149.3, 147.4, 145.5, 141.6, 138.6, 137.7, 132.8, 132.2, 128.8, 128.7, 128.2, 127.8, 127.0, 126.1, 125.7, 125.4, 124.8, 123.1 (overlapped), 121.5, 58.2, 54.9, 42.9, 29.1, 27.3, 21.3 (overlapped).

**HRMS (EI)**: m/z: [M]+ Calcd for, C30H26O, 402.1984, found: 402.1978.

**M.P.**: 91.8-94.5 oC.

**[α]D20** = 104.1 (c = 0.2, CHCl3).

**HPLC conditions:** Daicel Chiralpak IB column (95:5 n-Hexane: 2-Propanol, 0.5 mL/min, 254 nm); tr (minor) = 32.6 min, tr (major) = 29.8 min; 96% *ee*).


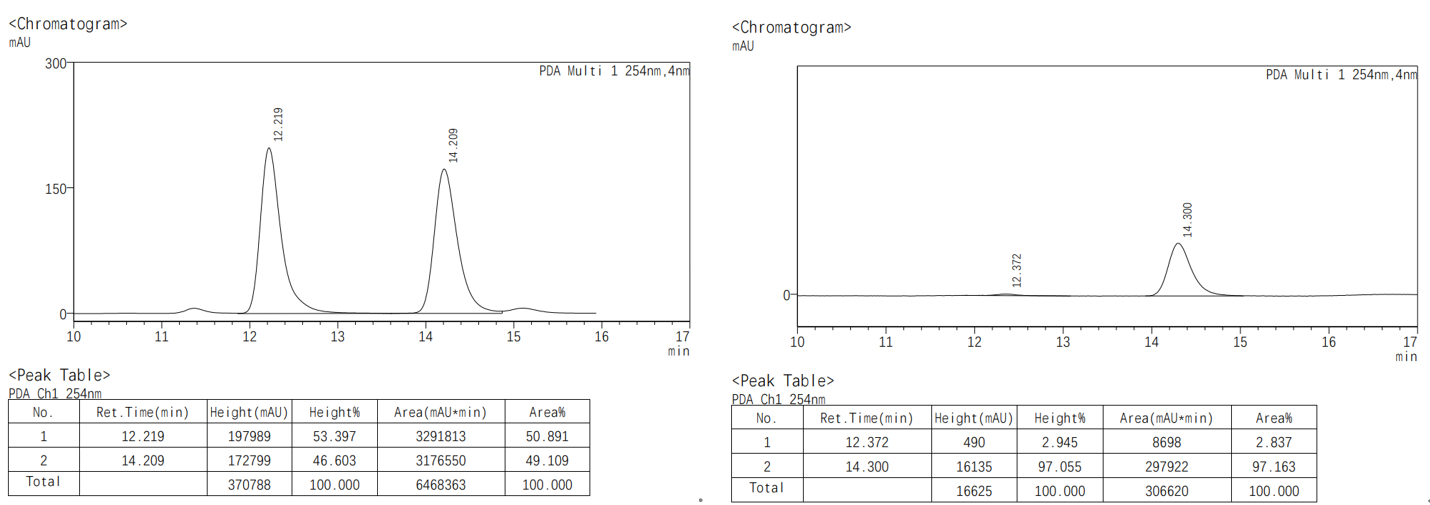


**(4a*R*,9*R*,9a*S*)-2-([1,1'-biphenyl]-4-yl)-6-methoxy-3,4,4a,9a-tetrahydro-4'H-spiro[fluorene-9,1'-naphthalen]-4'-one** (**3bh**).

The crude product was purified by column chromatography (petroleum ether/ethyl acetate = 50：1 to 30:1) to afford the product as white solid (108.1 mg, 75% yield).

**1H NMR** (400 MHz, CDCl3) δ 8.25 (d, *J =* 7.8 Hz, 1H), 7.56 (d, *J =* 7.7 Hz, 2H), 7.51 (d, *J =* 7.8 Hz, 3H), 7.45 – 7.33 (m, 5H), 7.31 (t, *J =* 7.3 Hz, 1H), 7.23 (d, *J =* 7.6 Hz, 1H), 6.98 (s, 1H), 6.93 (s, 1H), 6.72 (d, *J =* 8.5 Hz, 1H), 6.61 (d, *J =* 8.4 Hz, 1H), 6.37 (d, *J =* 10.2 Hz, 1H), 6.00 – 5.66 (m, 1H), 3.83 (s, 3H), 3.79 – 3.70 (m, 1H), 3.60 (qd, *J =* 8.1, 5.4 Hz, 1H), 2.74 – 2.48 (m, 2H), 2.42 – 2.29 (m, 1H), 1.71 (qd, *J =* 12.4, 5.2 Hz, 1H).

**13C NMR** (100 MHz, CDCl3) 185.2, 160.1, 154.6, 149.4, 148.9, 140.6, 140.4, 139.9, 137.8, 137.2, 132.8, 132.2, 128.7 (overlapped), 128.6, 127.2, 127.0, 126.9 (overlapped), 126.9 (overlapped), 126.1, 126.1, 125.5 (overlapped), 122.1, 114.0, 109.8, 57.6, 55.5, 55.4, 42.8, 28.9, 27.0.

**HRMS (EI)**: m/z: [M]+ Calcd for, C35H28O2, 480.2089, found: 480.2084.

**M.P.**: 224.6-225.8 oC.

**[α]D20** = 117.6 (c = 0.2, CHCl3).

**HPLC conditions**: Daicel Chiralpak IB column (90:10 n-Hexane: 2-Propanol, 0.5 mL/min, 254 nm); tr (minor) = 25.0 min, tr (major) = 20.7 min; 93% *ee*).


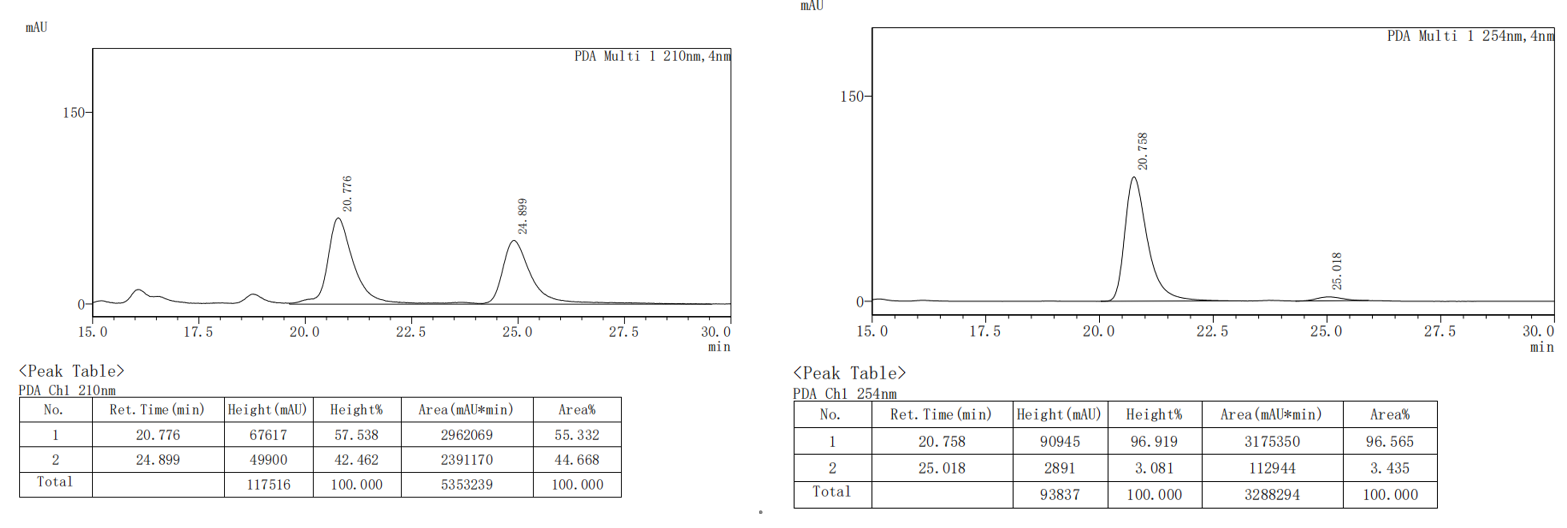
**(4a*R*,9*R*,9a*S*)-6-methoxy-2-(2-methoxyphenyl)-3,4,4a,9a-tetrahydro-4'H-spiro[fluor-ene-9,1'-naphthalen]-4'-one** (**3bi**)

The crude product was purified by column chromatography (petroleum ether/ethyl acetate = 50：1 to 30:1) to afford the product as white solid (86.0 mg, 66% yield).

**1H NMR** (400 MHz, CDCl3) δ 8.20 (dd, *J =* 7.9, 1.6 Hz, 1H), 7.47 (td, *J =* 7.7, 1.6 Hz, 1H), 7.37 (td, *J =* 7.6, 1.2 Hz, 1H), 7.26 – 7.11 (m, 2H), 7.04 (dd, *J =* 7.4, 1.8 Hz, 1H), 7.01 – 6.94 (m, 2H), 6.84 (ddd, *J =* 19.0, 7.8, 1.1 Hz, 2H), 6.72 (dd, *J =* 8.5, 2.5 Hz, 1H), 6.60 (d, *J =* 8.4 Hz, 1H), 6.39 (d, *J =* 10.2 Hz, 1H), 5.53 (dd, *J =* 3.9, 2.4 Hz, 1H), 3.83 (s, 3H), 3.76 (s, 3H), 3.75 – 3.69 (m, 1H), 3.61 (ddd, *J =* 13.0, 8.4, 5.0 Hz, 1H), 2.66 (dddd, *J =* 14.7, 12.0, 4.8, 2.5 Hz, 1H), 2.40 (dt, *J =* 16.3, 3.6 Hz, 1H), 2.33 – 2.18 (m, 1H), 1.66 (qd, *J =* 12.6, 4.3 Hz, 1H).

**13C NMR** (100 MHz, CDCl3) δ 185.2, 160.0, 156.5, 154.8, 149.5, 149.3, 138.4, 137.3, 132.7, 132.6, 132.2, 128.9, 128.6, 128.1, 126.8, 126.1, 126.0, 125.4, 123.8, 120.6, 113.9, 110.8, 109.8, 57.6, 55.4, 55.3, 55.2, 42.9, 29.0, 28.7.

**HRMS (EI)**: m/z: [M]+ Calcd for C30H26O3, 434.1882, found: 434.1876.

**M.P.**: 185.7-186.6 oC.

**[α]D20** = 73.7 (c = 0.2, CHCl3).

**HPLC conditions**: Daicel Chiralpak ID column (90:10 n-Hexane: 2-Propanol, 0.5 mL/min, 254 nm); tr (minor) = 41.9 min, tr (major) = 45.1 min; 98% *ee*).


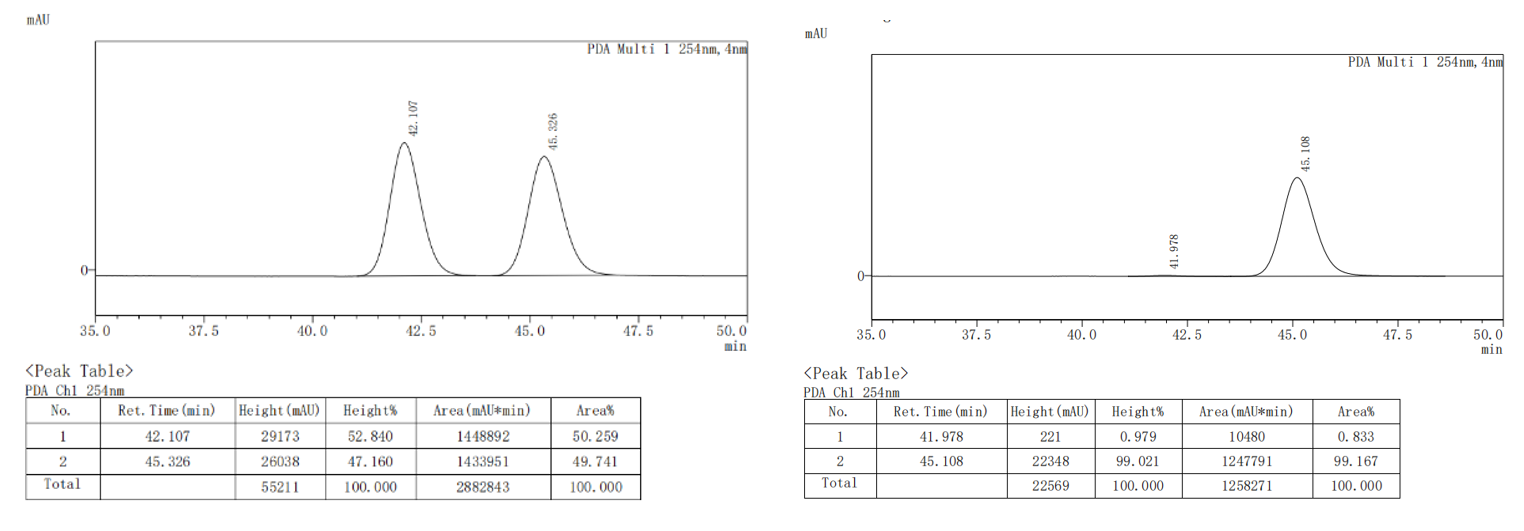


**(4a*R*,9*R*,9a*S*)-6-methoxy-2-(3-methoxyphenyl)-3,4,4a,9a-tetrahydro-4'H-spiro[fluorene-9,1'-naphthalen]-4'-one** (**3bj**).

The crude product was purified by column chromatography (petroleum ether/ethyl acetate = 50：1 to 30:1) to afford the product as white solid (86.2 mg, 66% yield)

**1H NMR** (400 MHz, CDCl3) δ 8.23 (dd, *J =* 7.8, 1.6 Hz, 1H), 7.50 (td, *J =* 7.5, 1.6 Hz, 1H), 7.41 (td, *J =* 7.5, 1.2 Hz, 1H), 7.27 – 7.14 (m, 1H), 6.97 (d, *J =* 2.5 Hz, 1H), 6.94 – 6.87 (m, 2H), 6.83 (t, *J =* 2.1 Hz, 1H), 6.81 – 6.68 (m, 2H), 6.61 (d, *J =* 8.4 Hz, 1H), 6.35 (d, *J =* 10.2 Hz, 1H), 5.77 (dd, *J =* 4.3, 2.0 Hz, 1H), 3.83 (s, 3H), 3.78 (s, 3H), 3.76 – 3.71 (m, 1H), 3.60 (ddd, *J =* 13.1, 8.5, 5.0 Hz, 1H), 2.66 – 2.45 (m, 2H), 2.41 – 2.21 (m, 1H), 1.83 – 1.44 (m, 1H).

**13C NMR** (100 MHz, CDCl3) δ 185.1, 160.1, 159.5, 154.5, 149.4, 148.9, 143.2, 138.3, 137.3, 132.8, 132.2, 129.2, 128.6, 127.0, 126.1, 126.1, 125.6, 122.3, 117.8, 114.0, 112.3, 111.2, 109.8, 57.5, 55.4, 55.4, 55.2, 42.9, 28.9, 27.2.

**HRMS (EI)**: m/z: [M]+ Calcd for C30H26O3, 434.1882, found: 434.1876.

**M.P.**: 135.2-137.9 oC.

**[α]D20** = 44.9 (c = 0.2, CHCl3).

**HPLC conditions**: Daicel Chiralpak IB column (90:10 n-Hexane: 2-Propanol, 0.5 mL/min, 254 nm); tr (minor) = 24.3 min, tr (major) = 20.3 min; 96% *ee*).


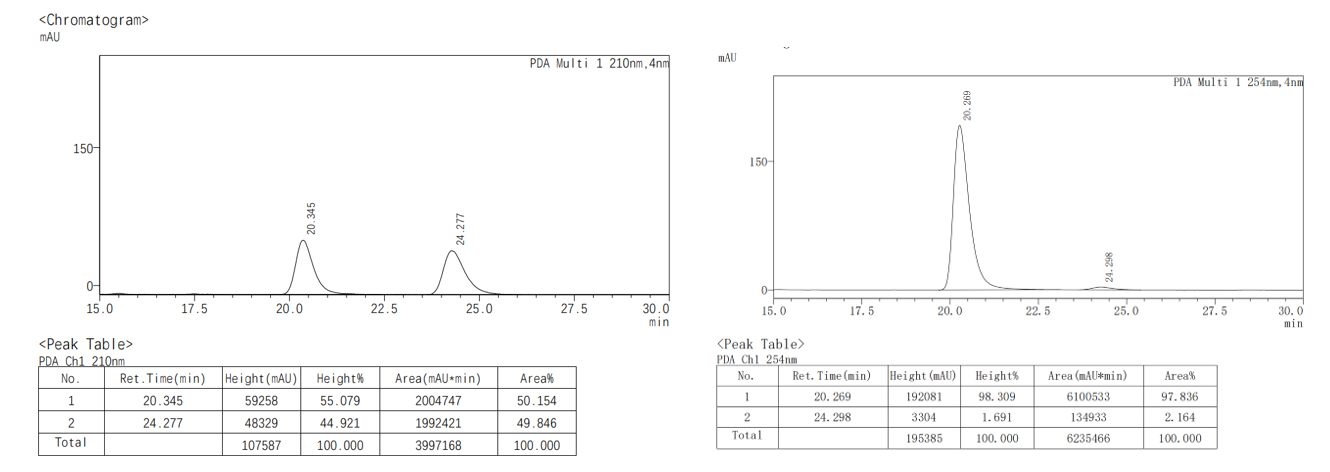


**(4a*R*,9*R*,9a*S*)-6-methoxy-2-(4-methoxyphenyl)-3,4,4a,9a-tetrahydro-4'H-spiro[fluorene-9,1'-naphthalen]-4'-one** (**3bk**).

The crude product was purified by column chromatography (petroleum ether/ethyl acetate = 50：1 to 30:1) to afford the product as white solid (102.3 mg, 78% yield)

**1H NMR** (400 MHz, CDCl3) δ 8.24 (d, *J =* 7.9 Hz, 1H), 7.50 (t, *J =* 7.6 Hz, 1H), 7.41 (t, *J =* 7.6 Hz, 1H), 7.24 (d, *J =* 8.0 Hz, 3H), 6.97 (s, 1H), 6.90 (d, *J =* 10.2 Hz, 1H), 6.81 (d, *J =* 7.0 Hz, 2H), 6.72 (d, *J =* 8.5 Hz, 1H), 6.60 (d, *J =* 8.4 Hz, 1H), 6.35 (d, *J =* 8.4 Hz, 1H), 5.71 – 5.66 (m, 1H), 3.83 (d, *J =* 1.7 Hz, 3H), 3.78 (d, *J =* 1.8 Hz, 3H), 3.76 – 3.72 (m, 1H), 3.59 (p, *J =* 6.8, 6.3 Hz, 1H), 2.62 – 2.46 (m, 2H), 2.37 – 2.29 (m, 1H), 1.76 – 1.61 (m, 1H).

**13C NMR** (100 MHz, CDCl3) δ 185.2, 160.0, 158.9, 154.7, 149.5, 149.0, 137.6, 137.3, 134.2, 132.8, 132.2, 128.6, 126.9, 126.3 (overlapped), 126.1, 126.0, 125.5, 120.3, 114.0, 113.6 (overlapped), 109.8, 57.6, 55.5, 55.4, 55.2, 42.9, 29.0, 27.1.

**HRMS (EI)**: m/z: [M]+ Calcd for C30H26O3, 434.1882, found: 434.1876.

**M.P.**: 179.8-181.9 oC.

**[α]D20** = 70.8 (c = 0.2, CHCl3).

**HPLC conditions**: Daicel Chiralpak IB column (97:3 n-Hexane: 2-Propanol, 0.4 mL/min, 254 nm); tr (minor) = 31.0 min, tr (major) = 28.9 min; 90% *ee*).


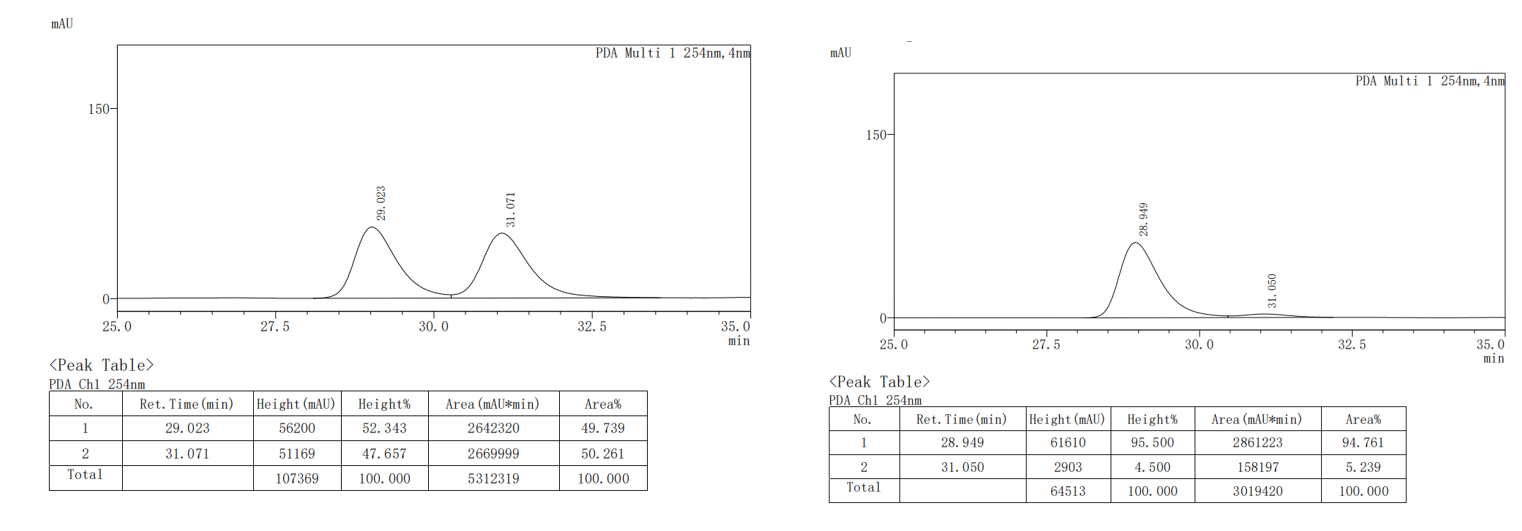


**(4a*R*,9*R*,9a*S*)-6-methoxy-2-(4-(methylthio)phenyl)-3,4,4a,9a-tetrahydro-4'H -spiro[fluorene-9,1'-naphthalen]-4'-one** (**3bl**).

The crude product was purified by column chromatography (petroleum ether/ethyl acetate = 50：1 to 30:1) to afford the product as white solid (87.8 mg, 65% yield).

**1H NMR** (400 MHz, CDCl3) δ 8.24 (dd, *J =* 7.8, 1.5 Hz, 1H), 7.50 (td, *J =* 7.5, 1.5 Hz, 1H), 7.46 – 7.37 (m, 1H), 7.22 (d, *J =* 8.5 Hz, 3H), 7.16 (d, *J =* 8.4 Hz, 2H), 6.97 (d, *J =* 2.5 Hz, 1H), 6.89 (d, *J =* 10.2 Hz, 1H), 6.72 (dd, *J =* 8.4, 2.5 Hz, 1H), 6.60 (d, *J =* 8.4 Hz, 1H), 6.34 (d, *J =* 10.3 Hz, 1H), 5.75 (dd, *J =* 4.3, 2.0 Hz, 1H), 3.83 (s, 3H), 3.74 (dt, *J =* 7.2, 3.0 Hz, 1H), 3.59 (ddd, *J =* 13.3, 8.4, 5.1 Hz, 1H), 2.62 – 2.50 (m, 2H), 2.45 (s, 3H), 2.33 (dq, *J =* 13.1, 4.2 Hz, 1H), 1.68 (tdd, *J =* 12.9, 10.7, 5.6 Hz, 1H).

**13C NMR** (100 MHz, CDCl3) δ 185.1, 160.0, 154.6, 149.4, 148.9, 138.4, 137.6, 137.2, 132.8, 132.2, 128.6, 126.9, 126.5 (overlapped), 126.1, 126.0, 125.5 (overlapped), 125.5, 121.5, 114.0, 109.8, 57.5, 55.4 (overlapped), 42.8, 28.9, 26.9, 15.9.

**HRMS (EI)**: m/z: [M]+ Calcd for, C30H26O2S, 450.1654, found: 450.1648.

**M.P.**: 82.7-84.0 oC.

**[α]D20** = 75.7 (c = 0.2, CHCl3).

**HPLC conditions:** Daicel Chiralpak IB column (90:10 n-Hexane: 2-Propanol, 0.5 mL/min, 254 nm); tr (minor) = 23.2 min, tr (major) = 20.0 min; 84% *ee*).


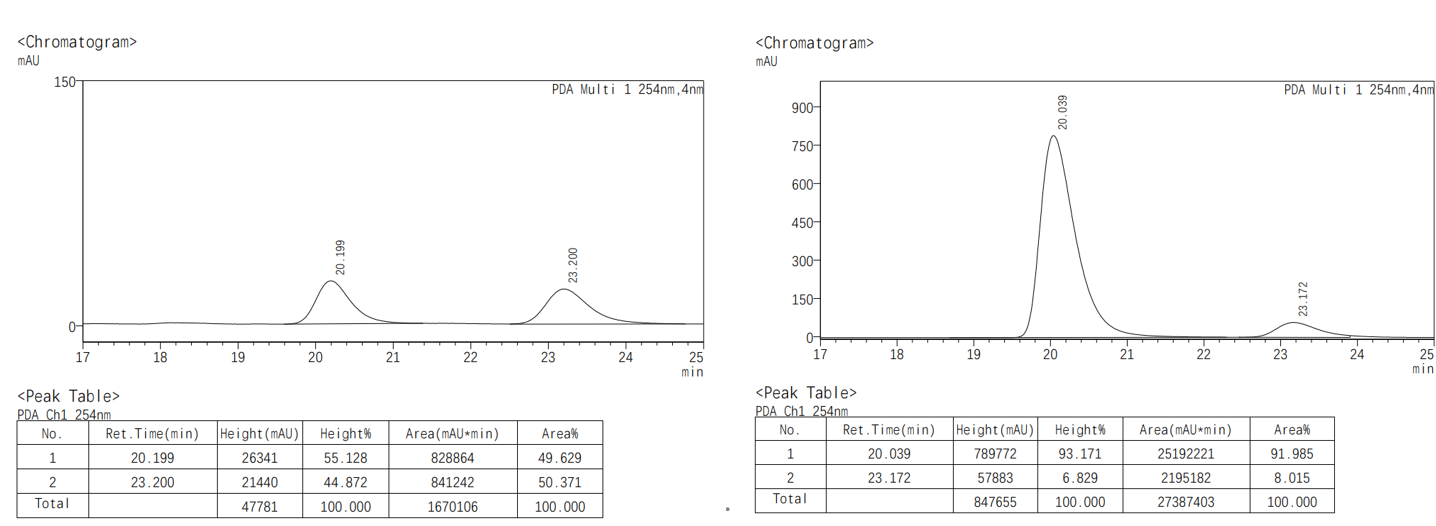


**(4a*R*,9*R*,9a*S*)-6-methoxy-2-(4-(trimethylsilyl)phenyl)-3,4,4a,9a-tetrahydro-4'H-spiro[fluorene-9,1'-naphthalen]-4'-one** (**3bm**).

The crude product was purified by column chromatography (petroleum ether/ethyl acetate = 50：1 to 30:1) to afford the product as white solid (98.4 mg, 69% yield).

**1H NMR** (400 MHz, CDCl3) δ 8.24 (d, *J =* 7.8 Hz, 1H), 7.49 (t, *J =* 7.6 Hz, 1H), 7.46 – 7.36 (m, 3H), 7.29 (d, *J =* 7.6 Hz, 2H), 7.22 (d, *J =* 7.3 Hz, 1H), 6.97 (d, *J =* 2.6 Hz, 1H), 6.89 (d, *J =* 10.2 Hz, 1H), 6.71 (d, *J =* 8.3 Hz, 1H), 6.60 (d, *J =* 8.4 Hz, 1H), 6.34 (d, *J =* 10.2 Hz, 1H), 5.79 (s, 1H), 3.82 (s, 2H), 3.74 (t, *J =* 5.9 Hz, 1H), 3.66 – 3.48 (m, 1H), 2.73 – 2.42 (m, 2H), 2.34 (dt, *J =* 13.5, 4.4 Hz, 1H), 1.70 (tt, *J =* 12.4, 6.0 Hz, 1H), 0.24 (s, 9H).

**13C NMR** (100 MHz, CDCl3) δ 185.1, 160.0, 154.5, 149.4, 148.9, 141.9, 139.2, 138.2, 137.2, 133.3 (overlapped), 132.8, 132.2, 128.6, 126.9, 126.1, 126.0, 125.5, 124.5 (overlapped), 122.2, 114.0, 109.8, 57.5, 55.4, 55.4, 42.8, 28.9, 26.9, -1.2 (overlapped).

**HRMS (EI)**: m/z: [M]+ Calcd for, C32H32O2Si, 476.2172, found: 476.2166.

**M.P.**: 94.1-112.7 oC.

**[α]D20** = 62.3 (c = 0.2, CHCl3).

**HPLC conditions**: Daicel Chiralpak IB column (95:5 n-Hexane: 2-Propanol, 0.5 mL/min, 254 nm); tr (minor) = 14.6 min, tr (major) = 13.4 min; 94% *ee*).


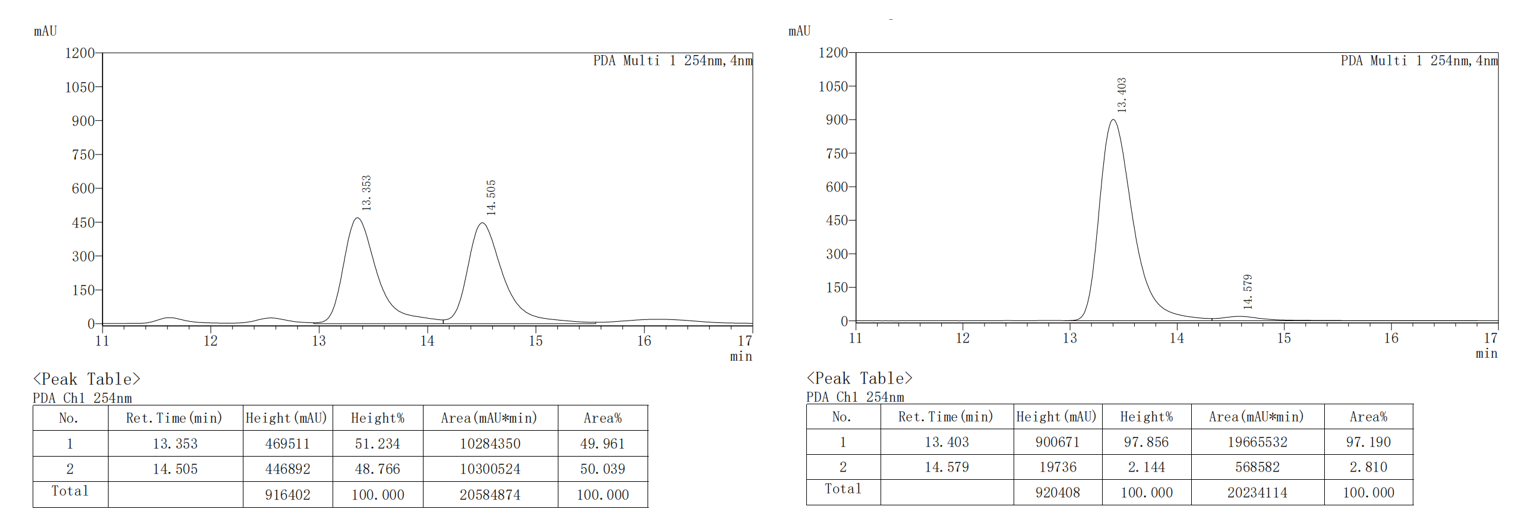


**(4a*R*,9*R*,9a*S*)-6-methoxy-2-(4-(trifluoromethoxy)phenyl)-3,4,4a,9a-tetra-hydro-4'H-spiro[fluorene-9,1'-naphthalen]-4'-one** (**3bn**).

The crude product was purified by column chromatography (petroleum ether/ethyl acetate = 50：1 to 30:1) to afford the product as white solid (95.9 mg, 65% yield).

**1H NMR** (400 MHz, CDCl3) δ 8.24 (dd, *J =* 7.9, 1.5 Hz, 1H), 7.50 (td, *J =* 7.6, 1.6 Hz, 1H), 7.41 (td, *J =* 7.5, 1.2 Hz, 1H), 7.34 – 7.27 (m, 2H), 7.27 – 7.18 (m, 1H), 7.11 (d, *J =* 8.1 Hz, 2H), 6.98 (d, *J =* 2.5 Hz, 1H), 6.89 (d, *J =* 10.2 Hz, 1H), 6.73 (dd, *J =* 8.4, 2.5 Hz, 1H), 6.61 (d, *J =* 8.4 Hz, 1H), 6.35 (d, *J =* 10.2 Hz, 1H), 5.78 – 5.73 (m, 1H), 3.83 (s, 3H), 3.74 (ddt, *J =* 8.3, 3.9, 1.8 Hz, 1H), 3.60 (ddd, *J =* 13.2, 8.4, 5.1 Hz, 1H), 2.56 (dp, *J =* 6.8, 2.4 Hz, 2H), 2.35 (dq, *J =* 13.1, 4.2 Hz, 1H), 1.69 (tdd, *J =* 13.1, 9.2, 7.2 Hz, 1H).

**13C NMR** (100 MHz, CDCl3) δ 185.1, 160.1, 154.4, 149.3, 148.7, 148.2, 140.3, 137.2, 137.1, 132.8, 132.2, 128.6, 127.0, 126.5 (overlapped), 126.1, 126.1, 125.6, 122.9, 120.7 (overlapped), 120.4 (q, *J =* 257.6), 114.1, 109.8, 57.5, 55.4, 55.3, 42.7, 28.8, 27.1.

**19F NMR** (376 MHz, CDCl3) δ -57.86.

**HRMS (EI)**: m/z: [M]+ Calcd for, C30H23F3O3, 488.1599, found: 488.1594.

**M.P.**: 80.4-86.3 oC.

**[α]D20** = 20.1 (c = 0.2, CHCl3).

**HPLC conditions:** Daicel Chiralpak IB column (95:5 n-Hexane: 2-Propanol, 0.5 mL/min, 254 nm); tr (minor) = 16.9 min, tr (major) = 15.5 min; 95% *ee*).


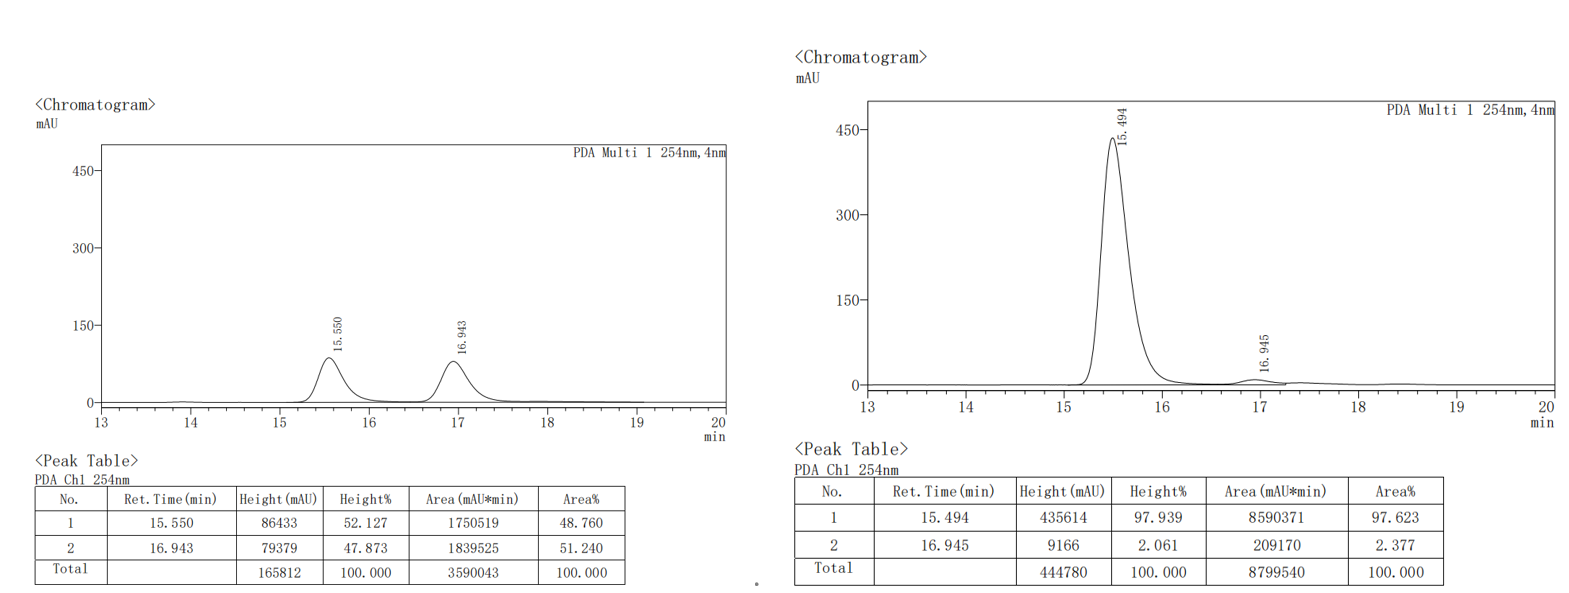


**(4a*R*,9*R*,9a*S*)-6-methoxy-2-(4-(trifluoromethyl)phenyl)-3,4,4a,9a-tetrahydro-4'H-spiro[fluorene-9,1'-naphthalen]-4'-one** (**3bo**).

The crude product was purified by column chromatography (petroleum ether/ethyl acetate = 50：1 to 30:1) to afford the product as white solid (85.6 mg, 60% yield).

**1H NMR** (400 MHz, CDCl3) δ 8.24 (d, *J =* 7.8 Hz, 1H), 7.51 (d, *J =* 7.9 Hz, 3H), 7.46 – 7.33 (m, 3H), 7.24 (d, *J =* 8.8 Hz, 1H), 6.99 (t, *J =* 1.9 Hz, 1H), 6.89 (d, *J =* 10.2 Hz, 1H), 6.73 (dt, *J =* 8.4, 1.8 Hz, 1H), 6.61 (d, *J =* 8.4 Hz, 1H), 6.36 (d, *J =* 10.2 Hz, 1H), 5.84 (d, *J =* 4.1 Hz, 1H), 3.83 (s, 3H), 3.78 – 3.72 (m, 1H), 3.61 (ddd, *J =* 13.3, 8.5, 5.2 Hz, 1H), 2.63 – 2.49 (m, 2H), 2.42 – 2.29 (m, 1H), 1.70 (tt, *J =* 13.0, 8.0 Hz, 1H).

**13C NMR** (100 MHz, CDCl3) δ 185.0, 160.1, 154.3, 149.2, 148.6, 145.0, 137.4, 137.0, 132.9, 132.2, 129.0 (q, *J* = 32.3 Hz), 128.6, 127.0, 126.1, 126.1, 125.6, 125.5, 125.4, 125.2 (q, *J* = 3.8 Hz), 124.3, 122.8, 114.1, 109.8, 57.4, 55.4, 55.3, 42.6, 28.7, 27.0.

**19F NMR** (376 MHz, CDCl3) δ -62.39.

**HRMS (EI)**: m/z: [M]+ Calcd for, C30H23F3O2, 472.1650, found: 472.1645.

**M.P.**: 102.7-105.8 oC.

**[α]D20** = 40.9 (c = 0.2, CHCl3).

**HPLC conditions:** Daicel Chiralpak IB column (90:10 n-Hexane: 2-Propanol, 0.5 mL/min, 254 nm); tr (minor) = 16.7 min, tr (major) = 15.3 min; 95% *ee*).


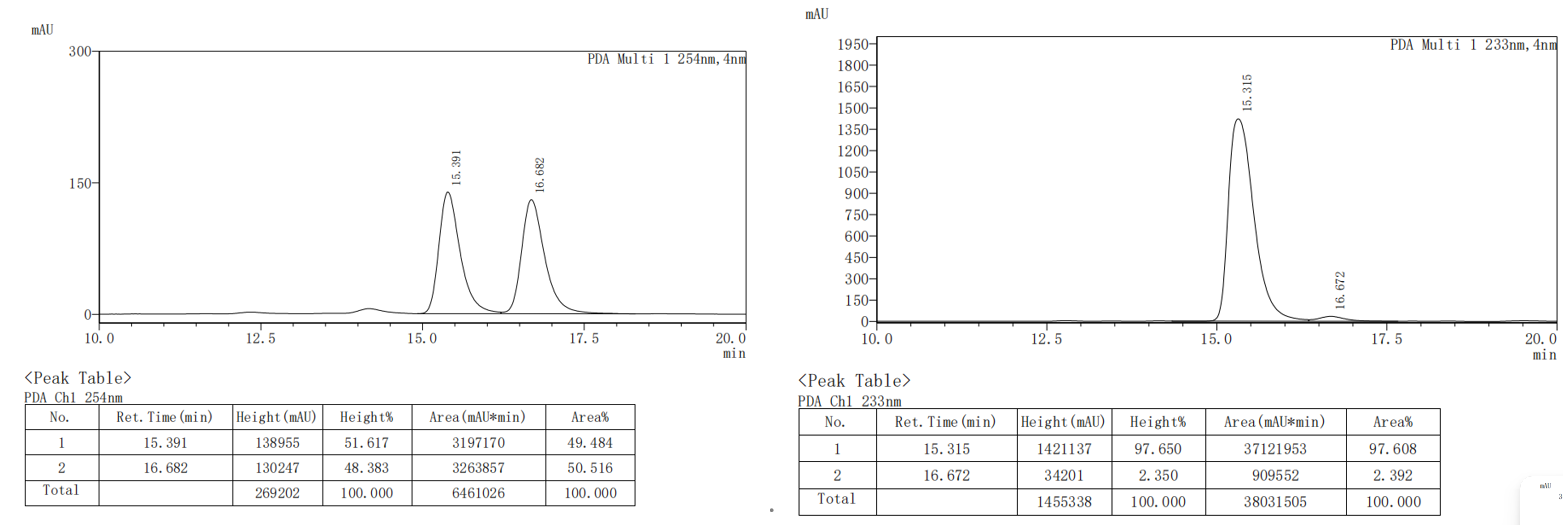


**(4a*R*,9*R*,9a*S*)-6-methoxy-2-(naphthalen-2-yl)-3,4,4a,9a-tetrahydro-4'H-spiro [fluorene-9,1'-naphthalen]-4'-one** (**3bp**).

The crude product was purified by column chromatography (petroleum ether/ethyl acetate = 50：1 to 30:1) to afford the product as white solid (104.1mg, 76% yield).

**1H NMR** (400 MHz, CDCl3) δ 8.26 (d, *J =* 7.8 Hz, 1H), 7.81 – 7.69 (m, 4H), 7.60 – 7.36 (m, 5H), 7.25 (d, *J =* 7.2 Hz, 2H), 7.01 – 6.91 (m, 2H), 6.73 (d, *J =* 5.9 Hz, 1H), 6.61 (d, *J =* 8.4 Hz, 1H), 6.38 (d, *J =* 8.8 Hz, 0H), 5.93 (s, 1H), 3.84 (s, 2H), 3.82 – 3.77 (m, 1H), 3.64 (td, *J =* 10.7, 8.3, 5.5 Hz, 1H), 2.71 (dtd, *J =* 27.0, 17.3, 15.0, 9.8 Hz, 2H), 2.39 (dt, *J =* 13.7, 4.2 Hz, 1H), 1.75 (qd, *J =* 12.5, 4.8 Hz, 1H).

**13C NMR** (100 MHz, CDCl3) 185.2, 160.1, 154.6, 149.5, 148.9, 138.7, 138.2, 137.3, 133.3, 132.8, 132.6, 132.2, 128.6, 128.0, 127.8, 127.5, 127.0, 126.2, 126.1, 126.1, 125.7, 125.6, 123.7, 123.6, 122.7, 114.1, 109.8, 57.6, 55.5, 55.5, 42.9, 29.0, 27.1.

**HRMS (EI)**: m/z: [M]+ Calcd for, C33H26O2, 454.1933, found: 454.1927.

**M.P.**: 100.4-102.5 oC.

**[α]D20** = 100.5 (c = 0.2, CHCl3).

**HPLC conditions:** Daicel Chiralpak IB column (95:5 n-Hexane: 2-Propanol, 0.5 mL/min, 254 nm); tr (minor) = 25.1 min, tr (major) = 19.5 min; 96% *ee*).


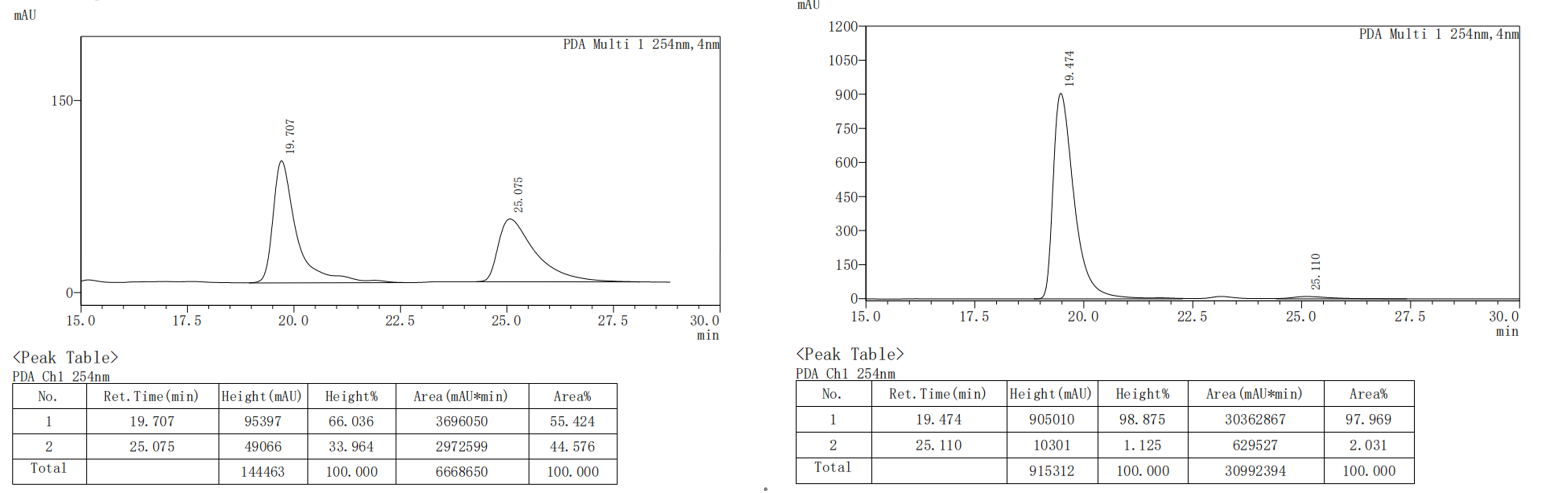


**(4a*R*,9*R*,9a*S*)-2-(benzo[d][1,3]dioxol-5-yl)-6-methoxy-3,4,4a,9a-tetrahydro-4'H-spiro[fluorene -9,1'-naphthalen]-4'-one** (**3bq**).

The crude product was purified by column chromatography (petroleum ether/ethyl acetate = 50：1 to 30:1) to afford the product as white solid (101.9 mg, 75% yield).

**1H NMR** (400 MHz, CDCl3) δ 7.49 (td, 1H), 7.41 (t, *J =* 7.5 Hz, 1H), 7.22 (d, *J =* 8.0 Hz, 1H), 6.96 (d, *J =* 2.5 Hz, 1H), 6.89 (d, *J =* 10.3 Hz, 1H), 6.78 (dd, *J =* 6.3, 2.0 Hz, 2H), 6.75 – 6.68 (m, 2H), 6.60 (d, *J =* 8.4 Hz, 1H), 6.35 (d, *J =* 10.2 Hz, 1H), 5.91 (s, 2H), 5.66 (dd, *J =* 4.6, 1.9 Hz, 1H), 3.83 (s, 3H), 3.73 (dt, *J =* 6.8, 2.9 Hz, 1H), 3.58 (ddd, *J =* 13.2, 8.5, 5.0 Hz, 1H), 2.53 (t, *J =* 4.3 Hz, 2H), 2.32 (dq, *J =* 13.2, 4.3 Hz, 1H), 1.69 (tdd, *J =* 12.9, 8.8, 5.0 Hz, 1H).

**13C NMR** (100 MHz, CDCl3) δ 185.2, 160.0, 154.6, 149.5, 148.9, 147.7, 146.7, 137.9, 137.3, 136.1, 132.8, 132.2, 128.6, 127.0, 126.2, 126.1, 125.5, 121.0, 118.7, 114.0, 109.8, 108.0, 105.8, 101.0, 57.5, 55.4 (overlapped), 42.8, 29.0, 27.4.

**HRMS (EI)**: m/z: [M]+ Calcd for, C30H24O4, 448.1675, found: 448.1669.

**M.P.**: 76.4-78.6 oC.

**[α]D20** = 30.9 (c = 0.2, CHCl3).

**HPLC conditions:** Daicel Chiralpak IB column (95:5 n-Hexane: 2-Propanol, 0.5 mL/min, 254 nm); tr (minor) = 32.6 min, tr (major) = 29.8 min; 96% *ee*).


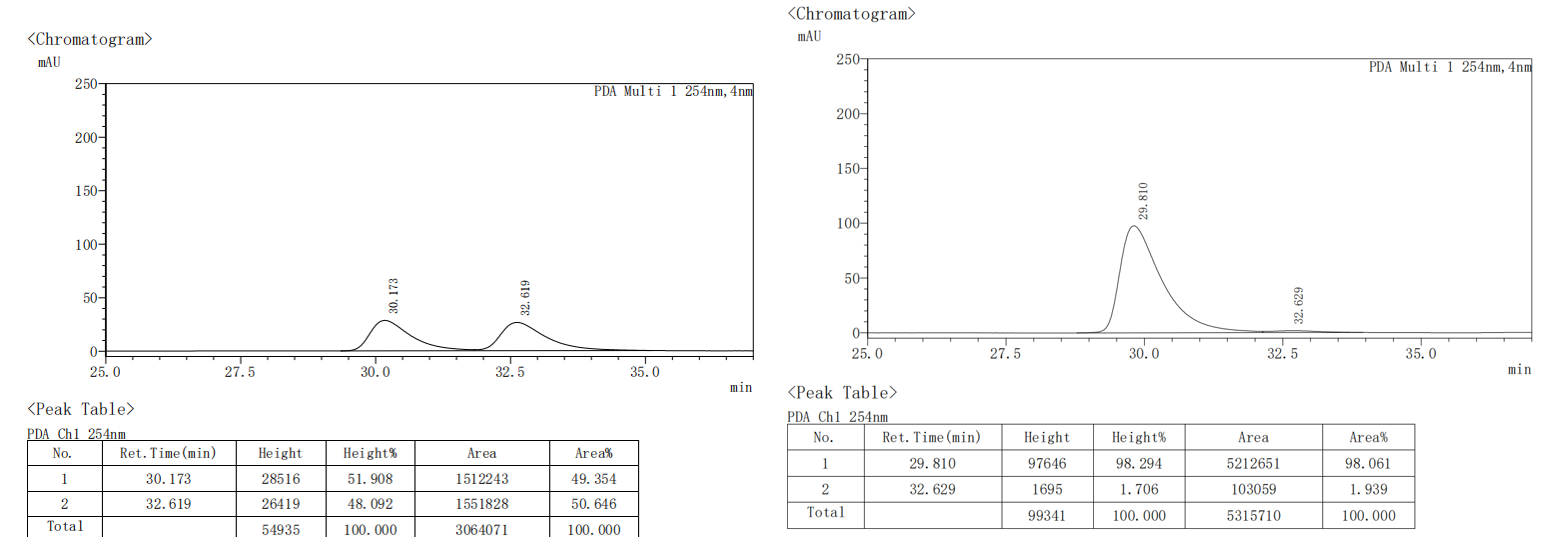


**(4a*R*,9*R*,9a*S*)-2-(benzofuran-6-yl)-6-methoxy-3,4,4a,9a-tetrahydro-4'H-spiro [fluorene-9,1'-naphthalen]-4'-one** (**3br**).

The crude product was purified by column chromatography (petroleum ether/ethyl acetate = 50：1 to 30:1) to afford the product as white solid (88.6 mg, 66% yield).

**1H NMR** (400 MHz, CDCl3) δ 8.25 (d, *J =* 7.9 Hz, 1H), 7.56 (s, 1H), 7.49 (d, *J =* 8.9 Hz, 2H), 7.40 (dd, *J =* 14.4, 7.9 Hz, 2H), 7.24 (d, *J =* 8.2 Hz, 2H), 6.96 (dd, *J =* 18.8, 6.5 Hz, 2H), 6.72 (d, *J =* 7.5 Hz, 2H), 6.61 (d, *J =* 6.7 Hz, 1H), 6.38 (d, *J =* 8.5 Hz, 1H), 3.83 (s, 1H), 3.80 – 3.71 (m, 3H), 3.66 – 3.48 (m, 1H), 2.74 – 2.57 (m, 2H), 2.50 – 2.28 (m, 1H), 1.73 (dt, *J =* 20.8, 6.5 Hz, 1H).

**13C NMR** (100 MHz, CDCl3) δ 185.2, 160.0, 154.7, 154.3, 149.5, 149.0, 145.3, 138.5, 137.3, 137.0, 132.8, 132.2, 128.6, 127.4, 126.9, 126.1, 126.0, 125.5, 122.0, 121.5, 117.6, 114.0, 110.9, 109.8, 106.7, 57.6, 55.5, 55.4, 42.8, 29.0, 27.8.

**HRMS (EI)**: m/z: [M]+ Calcd for, C31H24O3, 444.1725, found: 444.1724.

**M.P.**: 141.8-156.3 oC.

**[α]D20** = 70.0 (c = 0.2, CHCl3).

**HPLC conditions:** Daicel Chiralpak IB column (90:10 n-Hexane: 2-Propanol, 0.5 mL/min, 254 nm); tr (minor) = 19.5 min, tr (major) = 17.9 min; 91% *ee*).


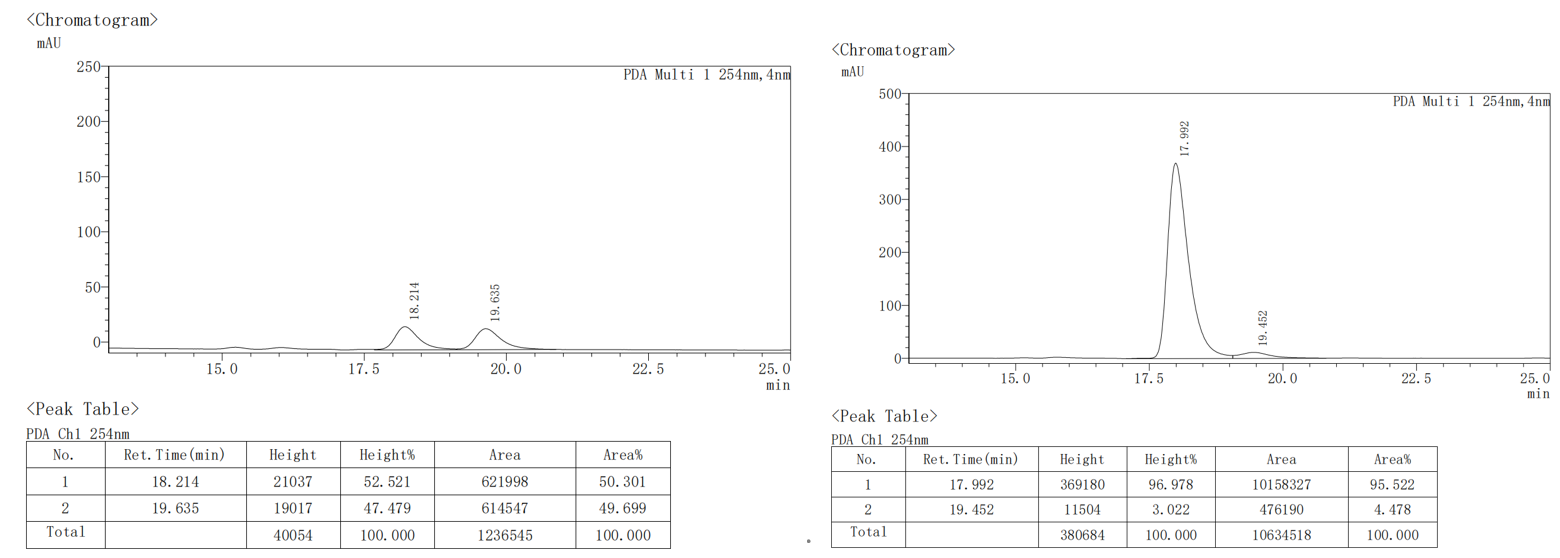


**(4a*R*,9*R*,9a*S*)-2-(benzo[b]thiophen-6-yl)-6-methoxy-3,4,4a,9a-tetrahydro-4'H-spiro[fluorene-9,1'-naphthalen]-4'-one** (**3bs**).

The crude product was purified by column chromatography (petroleum ether/ethyl acetate = 50：1 to 30:1) to afford the product as white solid (95.8 mg, 69% yield).

**1H NMR** (400 MHz, CDCl3) δ 8.25 (d, *J =* 7.8 Hz, 1H), 7.82 – 7.69 (m, 2H), 7.50 (t, *J =* 7.6 Hz, 1H), 7.44 – 7.36 (m, 2H), 7.33 – 7.19 (m, 3H), 6.98 (s, 1H), 6.93 (d, *J =* 12.0 Hz, 1H), 6.71 (d, *J =* 2.2 Hz, 1H), 6.60 (d, *J =* 6.7 Hz, 1H), 6.38 (d, *J =* 8.5 Hz, 1H), 5.82 (s, 1H), 3.83 (s, 3H), 3.80 – 3.75 (m, 1H), 3.62 (dt, *J =* 13.3, 6.5 Hz, 1H), 2.64 (dt, *J =* 10.0, 3.1 Hz, 2H), 2.37 (dt, *J =* 13.7, 4.3 Hz, 1H), 1.73 (qd, *J =* 12.7, 12.3, 5.8 Hz, 1H).

**13C NMR** (100 MHz, CDCl3) δ 185.2, 160.0, 154.7, 149.5, 148.9, 139.7, 138.5, 138.3, 138.1, 137.3, 132.8, 132.2, 128.6, 127.0, 126.7, 126.1, 126.1, 125.5, 124.0, 122.1, 122.0, 122.0, 119.9, 114.0, 109.8, 57.5, 55.5, 55.4, 42.9, 29.0, 27.5.

**HRMS (EI)**: m/z: [M]+ Calcd for, C31H24O2S, 460.1497, found: 460.1492.

**M.P.**: 102.2-105.7oC.

**[α]D20** = 79.0 (c = 0.2, CHCl3).

**HPLC conditions:** Daicel Chiralpak IB column (90:10 n-Hexane: 2-Propanol, 0.5 mL/min, 254 nm); tr (minor) = 23.8 min, tr (major) = 20.8 min; 94% *ee*).


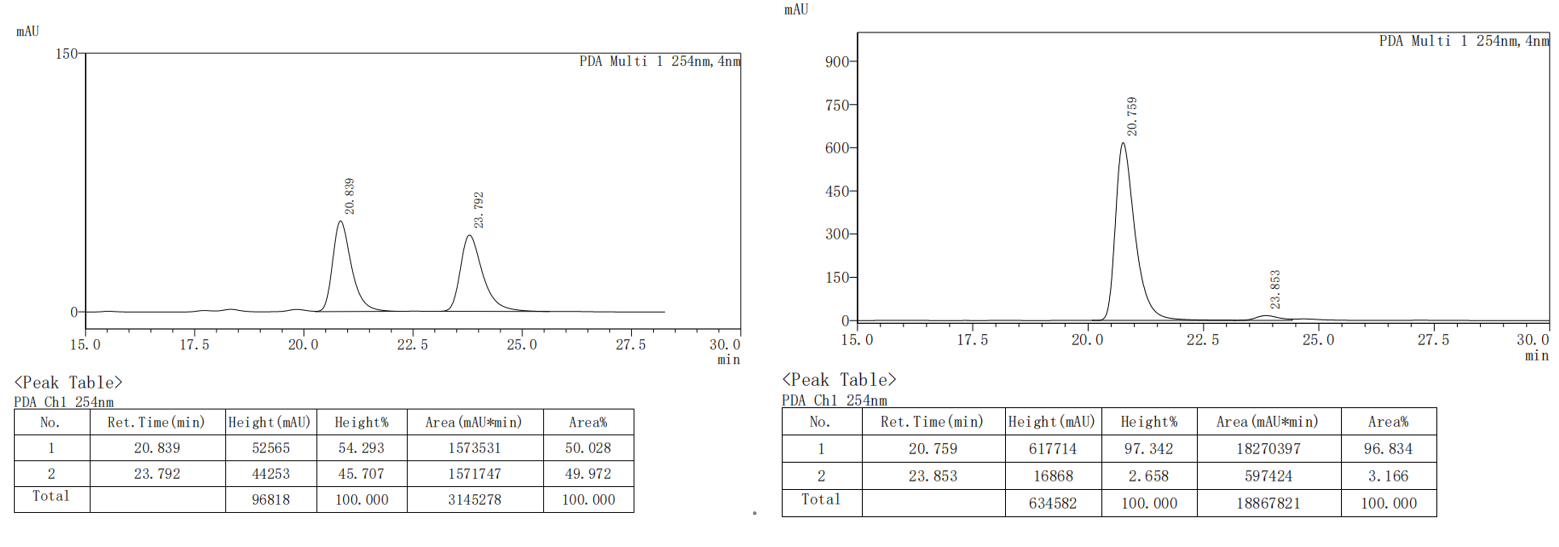


**(4a*R*,9*R*,9a*S*)-6-methoxy-2-(thiophen-3-yl)-3,4,4a,9a-tetrahydro-4'H-spiro[fluor-ene-9,1'-naphthalen]-4'-one** (**3bt**).

The crude product was purified by column chromatography (petroleum ether/ethyl acetate = 50：1 to 30:1) to afford the product as white solid (80.1 mg, 65% yield).

**1H NMR** (400 MHz, CDCl3) δ 8.24 (dd, *J =* 7.8, 1.5 Hz, 1H), 7.50 (td, *J =* 7.5, 1.5 Hz, 1H), 7.42 (td, 1H), 7.24 – 7.17 (m, 2H), 7.14 – 7.08 (m, 2H), 6.96 (d, *J =* 2.5 Hz, 1H), 6.89 (d, *J =* 10.2 Hz, 1H), 6.71 (dd, *J =* 8.4, 2.5 Hz, 1H), 6.59 (d, *J =* 8.4 Hz, 1H), 6.32 (d, *J =* 10.1 Hz, 1H), 5.81 (dd, *J =* 4.3, 2.2 Hz, 1H), 3.83 (s, 3H), 3.74 (dt, *J =* 7.6, 3.4 Hz, 1H), 3.59 (ddd, *J =* 13.2, 8.4, 5.1 Hz, 1H), 2.64 (dt, *J =* 16.6, 3.9 Hz, 1H), 2.49 (dddd, *J =* 16.2, 13.9, 4.9, 2.5 Hz, 1H), 2.32 (dp, *J =* 12.7, 4.3, 3.5 Hz, 1H), 1.77 – 1.65 (m, 2H).

**13C NMR** (100 MHz, CDCl3) δ 185.1, 160.0, 154.5, 149.4, 148.9, 142.8, 137.2, 133.3, 132.8, 132.2, 128.6, 126.9, 126.1, 126.0, 125.5 (overlapped), 124.8, 120.7, 119.3, 114.0, 109.8, 57.4, 55.4, 55.3, 42.9, 28.7, 26.8.

**HRMS (EI)**: m/z: [M]+ Calcd for, C27H22O2S, 410.1341, found: 410.1338.

**M.P.**: 180.5-181.4 oC.

**[α]D20** = 71.7 (c = 0.2, CHCl3).

**HPLC conditions**: Daicel Chiralpak IB column (95:5 n-Hexane: 2-Propanol, 0.5 mL/min, 254 nm); tr (minor) = 25.4 min, tr (major) = 21.4 min; 95% *ee*).


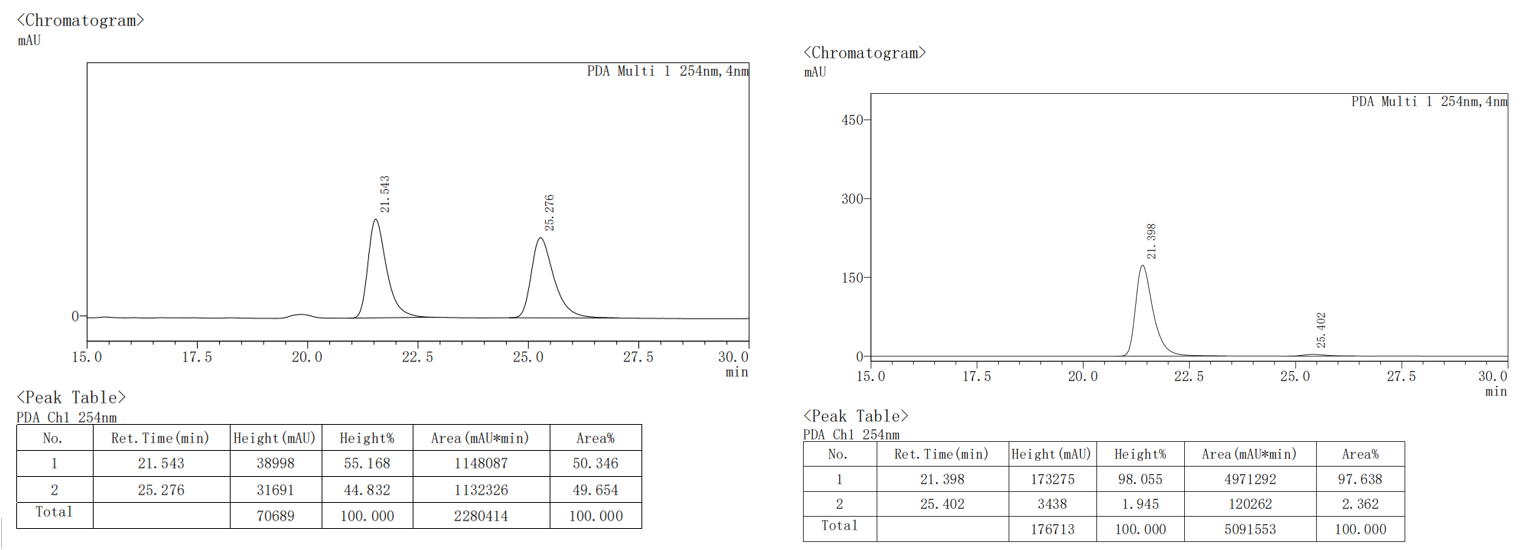


**(4a*R*,9*R*,9a*S*)-2-benzyl-6-methoxy-3,4,4a,9a-tetrahydro-4'H-spiro[fluorene-9,1'-naphthalen]-4'-one** (**3bu**).

The crude product was purified by column chromatography (petroleum ether/ethyl acetate = 50：1 to 30:1) to afford the product as white solid (85.3 mg, 68% yield).

**1H NMR** (400 MHz, CDCl3) δ 8.22 (dd, *J =* 7.8, 1.5 Hz, 1H), 7.47 (td, *J =* 7.5, 1.6 Hz, 1H), 7.39 (td, *J =* 7.5, 1.2 Hz, 1H), 7.23 (d, *J =* 7.3 Hz, 2H), 7.18 (t, *J =* 6.9 Hz, 2H), 7.13 – 7.08 (m, 2H), 6.93 – 6.84 (m, 2H), 6.69 (dd, *J =* 8.4, 2.5 Hz, 1H), 6.57 (d, *J =* 8.4 Hz, 1H), 6.37 (d, *J =* 10.2 Hz, 1H), 5.26 (d, *J =* 3.9 Hz, 1H), 3.80 (s, 3H), 3.67 – 3.53 (m, 1H), 3.45 (ddd, *J =* 13.2, 8.4, 5.0 Hz, 1H), 3.35 – 3.14 (m, 2H), 2.17 – 2.07 (m, 1H), 2.06 – 1.86 (m, 2H), 1.48 (tdd, *J =* 12.4, 10.1, 6.0 Hz, 1H).

**13C NMR** (100 MHz, CDCl3) δ 185.2, 159.9, 154.9, 149.5, 149.2, 139.5, 138.9, 137.3, 132.7, 132.2, 128.7 (overlapped), 128.6, 128.2 (overlapped), 126.8, 126.1 (overlapped), 126.0, 125.4, 120.7, 113.9, 109.7, 57.4, 55.4, 55.2, 44.4, 42.8, 28.8, 27.2.

**HRMS (EI)**: m/z: [M]+ Calcd for, C30H26O2, 418.1933, found: 418.1932.

**M.P.**: 98.5-99.3 oC.

**[α]D20** = 80.9 (c = 0.2, CHCl3).

**HPLC conditions:** Daicel Chiralpak IB column (95:5 n-Hexane: 2-Propanol, 0.5 mL/min, 254 nm); tr (minor) = 18.0 min, tr (major) = 17.2 min; 97% *ee*).


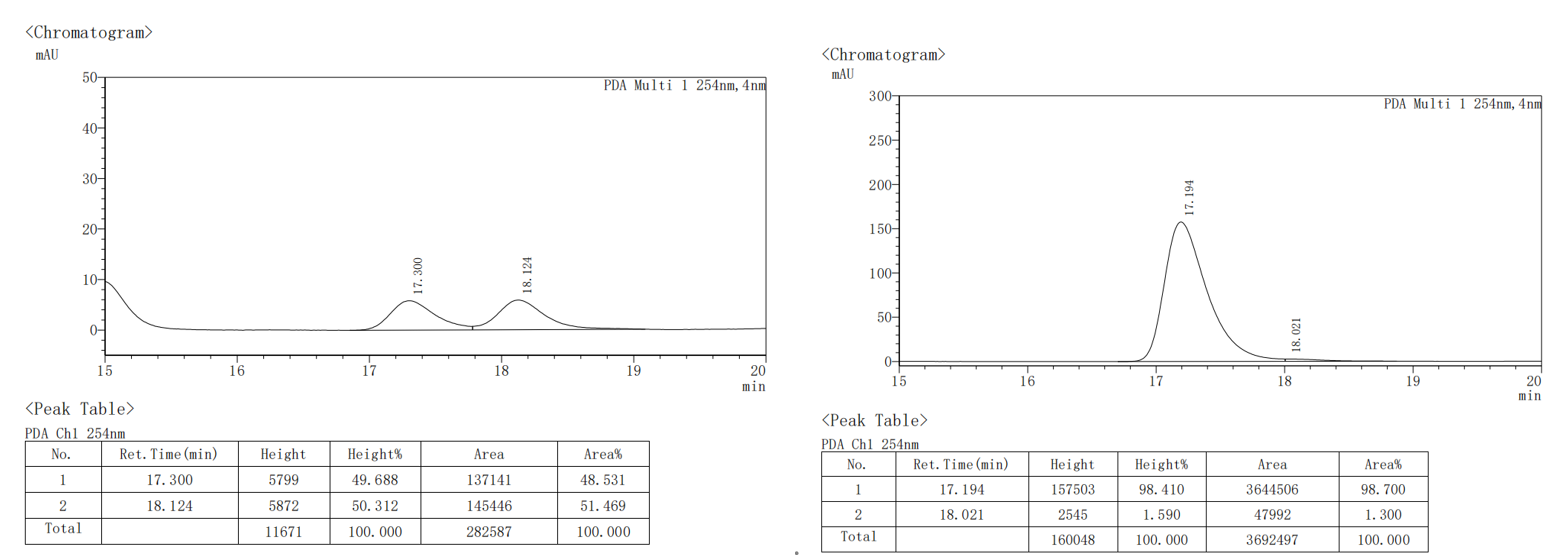


**(4a*R*,9*R*,9a*S*)-2-butyl-6-methoxy-3,4,4a,9a-tetrahydro-4'H-spiro[fluorene-9,1'-naphthalen]-4'-one** (**3bv**).

The crude product was purified by column chromatography (petroleum ether/ethyl acetate = 50：1 to 30:1) to afford the product as yellow oil (69.2 mg, 60% yield).

**1H NMR** (400 MHz, CDCl3) δ 8.21 (dd, *J =* 7.8, 1.6 Hz, 1H), 7.47 (td, 1H), 7.39 (td, 1H), 7.18 (d, *J =* 6.7 Hz, 1H), 6.92 (d, *J =* 2.5 Hz, 1H), 6.84 (d, *J =* 10.2 Hz, 1H), 6.69 (dd, *J =* 8.4, 2.5 Hz, 1H), 6.57 (d, *J =* 8.4 Hz, 1H), 6.31 (d, *J =* 10.2 Hz, 1H), 5.10 (s, 1H), 3.82 (s, 3H), 3.56 – 3.52 (m, 1H), 3.46 (ddd, *J =* 13.3, 8.4, 4.8 Hz, 1H), 2.26 – 2.13 (m, 1H), 2.13 – 2.01 (m, 2H), 1.95 (t, *J =* 7.4 Hz, 2H), 1.60 – 1.46 (m, 1H), 1.36 – 1.27 (m, 1H), 1.23 (dd, *J =* 14.9, 7.8 Hz, 2H), 0.85 (t, *J =* 7.2 Hz, 3H).

**13C NMR** (100 MHz, CDCl3) δ 185.4, 160.0, 155.0, 149.8, 149.4, 140.0, 137.6, 132.7, 132.3, 128.7, 126.8, 126.2, 126.0, 125.3, 118.5, 113.8, 109.8, 57.4, 55.5, 55.2, 43.2, 37.6, 29.8, 29.0, 27.8, 22.3, 13.9.

**HRMS (EI)**: m/z: [M]+ Calcd for, C27H28O2, 384.2089, found: 384.2058.

**[α]D20** = -15.9 (c = 0.2, CHCl3).

**HPLC conditions:** Daicel Chiralpak IB column (99:1 n-Hexane: 2-Propanol, 0.5 mL/min, 254 nm); tr (minor) = 18.3 min, tr (major) = 19.0 min; 91% *ee*).


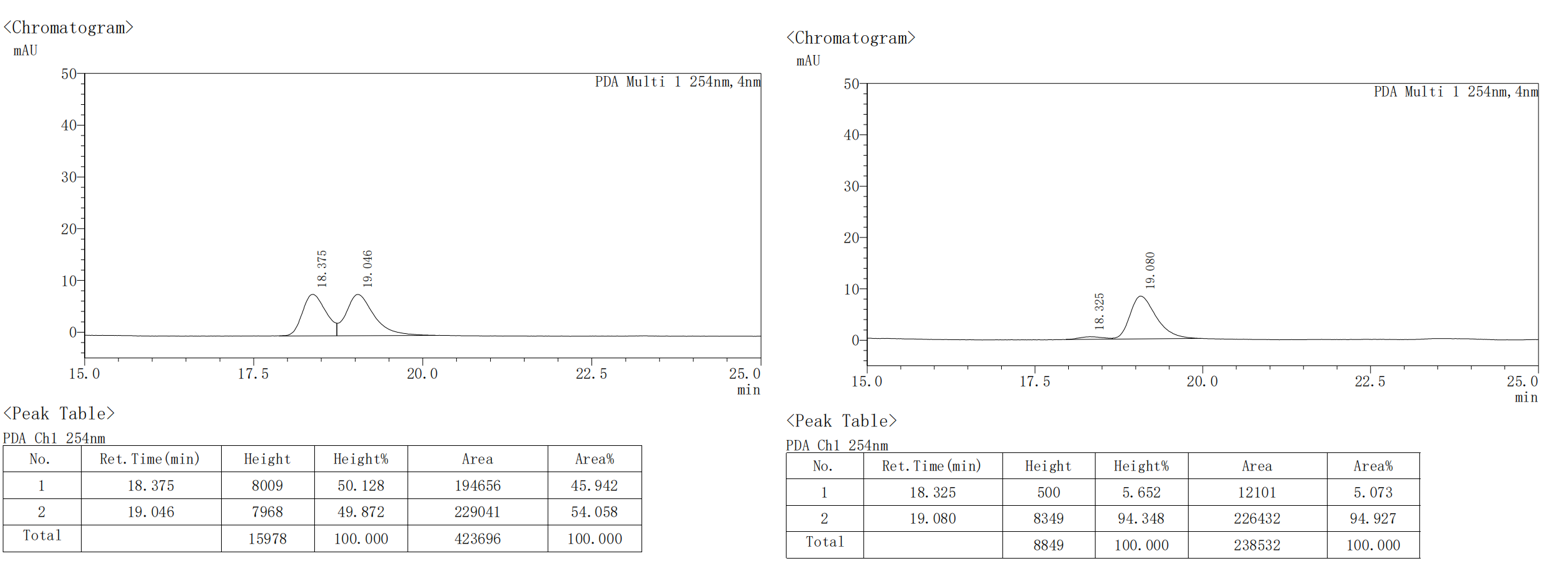


**(4a*R*,9*R*,9a*S*)-2-cyclohexyl-6-methoxy-3,4,4a,9a-tetrahydro-4'H-spiro[fluorene-9,1'-naphthalen]-4'-one** (**3bw**).

The crude product was purified by column chromatography (petroleum ether/ethyl acetate = 50：1 to 30:1) to afford the product as white solid (76.3 mg, 62% yield).

**1H NMR** (400 MHz, CDCl3) δ 8.21 (dd, *J =* 7.8, 1.6 Hz, 1H), 7.47 (td, *J =* 7.5, 1.6 Hz, 1H), 7.38 (td, *J =* 7.5, 1.3 Hz, 1H), 7.19 (dd, *J =* 8.0, 1.3 Hz, 1H), 6.92 (d, *J =* 2.5 Hz, 1H), 6.81 (d, *J =* 10.2 Hz, 1H), 6.69 (dd, *J =* 8.4, 2.5 Hz, 1H), 6.57 (d, *J =* 8.4 Hz, 1H), 6.30 (d, *J =* 10.2 Hz, 1H), 5.20 – 4.95 (m, 1H), 3.82 (s, 3H), 3.65 – 3.51 (m, 1H), 3.47 (ddd, *J =* 13.4, 8.5, 4.8 Hz, 1H), 2.29 – 2.14 (m, 1H), 2.14 – 2.04 (m, 2H), 1.85 – 1.73 (m, 1H), 1.70 (dt, *J =* 9.2, 3.0 Hz, 2H), 1.62 (d, *J =* 8.8 Hz, 3H), 1.49 (tdd, *J =* 14.1, 10.8, 6.9 Hz, 1H), 1.28 – 1.16 (m, 2H), 1.08 (tdd, *J =* 12.0, 7.0, 3.2 Hz, 2H), 0.96 – 0.84 (m, 1H).

**13C NMR** (100 MHz, CDCl3) δ 185.4, 160.0, 155.1, 149.8, 149.5, 144.9, 137.5, 132.7, 132.3, 128.7, 126.8, 126.1, 126.0, 125.2, 116.6, 113.8, 109.8, 57.5, 55.4, 55.0, 45.9, 43.5, 32.1, 31.3, 29.2, 26.7, 26.6, 26.5, 26.3.

**HRMS (EI)**: m/z: [M]+ Calcd for, C29H30O2, 410.2246, found: 410.2243.

**M.P.**: 59.4-60.9 oC.

**[α]D20** = -18.9 (c = 0.2, CHCl3).

**HPLC conditions:** Daicel Chiralpak IB and IA column (97:3 n-Hexane: 2-Propanol, 0.5 mL/min, 254 nm); tr (minor) = 29.9 min, tr (major) = 30.8 min; 97% *ee*).


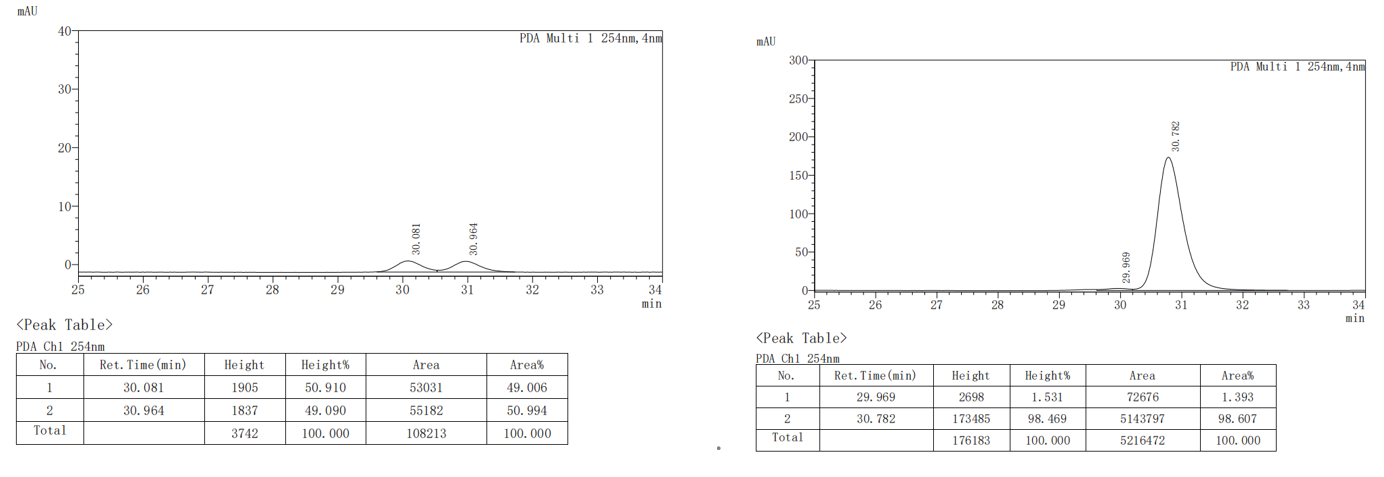


**(4a*R*,9*R*,9a*S*)-6-methoxy-3,4,4a,9a-tetrahydro-4'H-spiro[fluorene-9,1'-naphthalen]-4'-one** (**3bx**).

The crude product was purified by column chromatography (petroleum ether/ethyl acetate = 50：1 to 30:1) to afford the product as white solid (75.7 mg, 66% yield).

**1H NMR** (400 MHz, CDCl3) δ 8.20 (d, *J =* 7.8 Hz, 1H), 7.47 (t, *J =* 7.5 Hz, 1H), 7.38 (t, *J =* 7.6 Hz, 1H), 7.19 (d, *J =* 7.9 Hz, 1H), 6.93 (s, 1H), 6.87 (d, *J =* 10.2 Hz, 1H), 6.70 (d, *J =* 5.9 Hz, 1H), 6.58 (d, *J =* 8.4 Hz, 1H), 6.33 (d, *J =* 8.5 Hz, 1H), 5.85 (ddd, *J =* 10.4, 5.1, 2.5 Hz, 1H), 5.41 (d, *J =* 10.2 Hz, 1H), 3.82 (s, 3H), 3.53 (m, *J =* 4.6 Hz, 2H), 2.16 (m, *J =* 10.5, 5.3 Hz, 3H), 1.53 (dt, *J =* 12.1, 6.9 Hz, 1H).

**13C NMR** (100 MHz, CDCl3) δ 185.1, 159.9, 154.6, 149.4, 149.3, 137.3, 132.7, 132.2, 128.6, 128.3, 126.8, 126.1, 126.0, 125.4, 124.9, 113.8, 109.7, 57.0, 55.4, 54.3, 43.2, 28.3, 24.2.

**HRMS (EI)**: m/z: [M]+ Calcd for, C23H20O, 328.1463, found: 328.1462.

**M.P.**: 100.5-101.7 oC.

**[α]D20** = 74.1 (c = 0.2, CHCl3).

**HPLC conditions:** Daicel Chiralpak IB column (99:1 n-Hexane: 2-Propanol, 0.3 mL/min, 254 nm); tr (minor) = 42.2 min, tr (major) = 39.6 min; 92% *ee*).


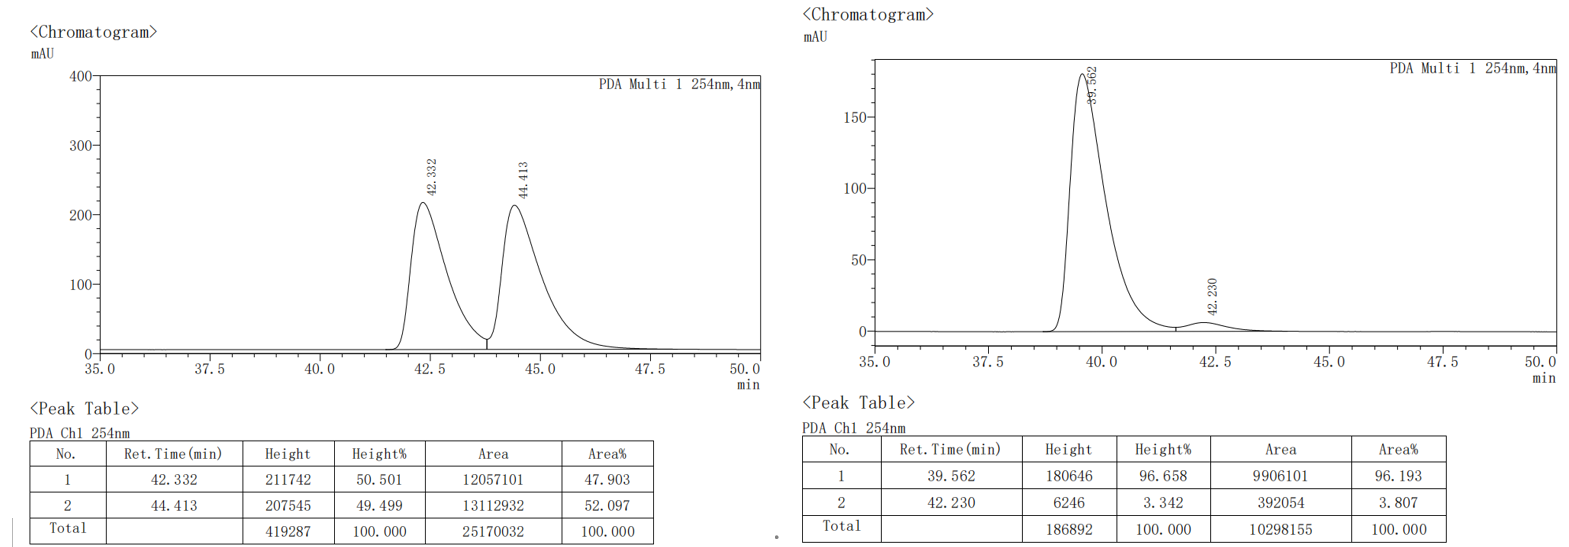


**(1*R*,2*S*)-2-((*E*)-styryl)-2,3-dihydro-4'H-spiro[indene-1,1'-naphthalen]-4'-one** (**3by**).

The crude product was purified by column chromatography (petroleum ether/ethyl acetate = 50：1 to 30:1) to afford the product as white solid (54.0 mg, 52% yield).

**1H NMR** (400 MHz, CDCl3) δ 8.23 (dd, *J =* 7.9, 1.5 Hz, 1H), 7.55 (td, *J =* 7.6, 1.5 Hz, 1H), 7.48 – 7.36 (m, 2H), 7.35 – 7.10 (m, 9H), 6.92 (d, *J =* 10.2 Hz, 1H), 6.66 (d, *J =* 7.6 Hz, 1H), 6.42 (d, *J =* 10.2 Hz, 1H), 6.20 (dd, *J =* 15.8, 1.1 Hz, 1H), 6.05 (dd, *J =* 15.8, 7.2 Hz, 1H), 3.81 (dt, *J =* 11.3, 6.9 Hz, 1H), 3.58 – 3.15 (m, 2H).

**13C NMR** (100 MHz, CDCl3) δ 184.9, 149.6, 147.0, 146.3, 142.7, 136.6, 133.1, 132.7, 131.9, 128.5, 128.2, 128.0, 127.5, 127.5, 127.3, 127.2, 127.0, 126.3, 126.2, 125.1, 124.9, 77.0, 59.7, 58.5, 36.6.

**HRMS (EI)**: m/z: [M]+ Calcd for, C26H20O, 348.1514, found: 348.1521.

**[α]D20** = 3.8 (c = 0.2, CHCl3).

**HPLC conditions:** Daicel Chiralpak IB column (85:15 n-Hexane: 2-Propanol, 0.5 mL/min, 254 nm); tr (minor) = 15.4 min, tr (major) = 17.2 min; 33% *ee*).


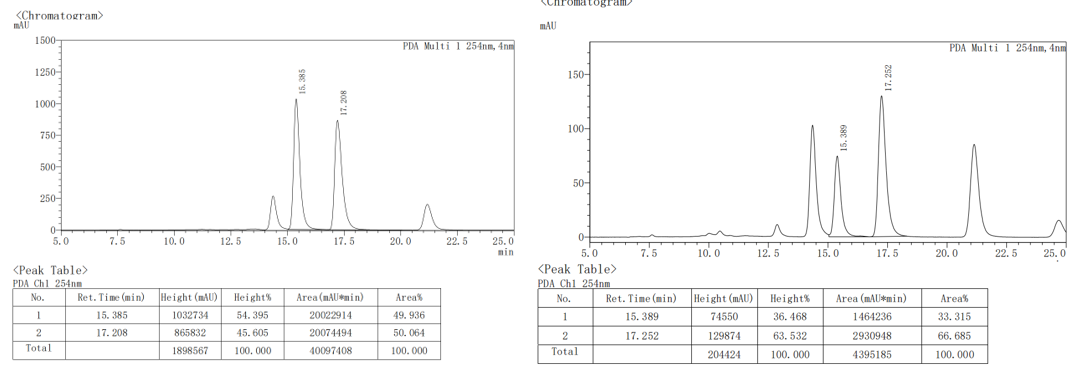


**(4a*R*,9*R*,9a*S*)-2-(4-(((2*R*)-2-isopropyl-5-methylcyclohexyl)oxy) phenyl)-3,4, 4a,9a-tetrahydro-4'H-spiro [fluorene-9,1'-naphthalen]-4'-one** (**4a**).

The crude product was purified by column chromatography (petroleum ether/ethyl acetate = 50：1 to 30:1) to afford the product as white solid (98.1 mg, 62% yield).

**1H NMR** (400 MHz, CDCl3) δ 8.25 (d, *J =* 7.8 Hz, 1H), 7.43 (ddd, *J =* 19.0, 13.5, 7.5 Hz, 3H), 7.30 (t, *J =* 7.5 Hz, 1H), 7.21 – 7.11 (m, 3H), 6.90 (d, *J =* 10.2 Hz, 1H), 6.81 (d, *J =* 8.2 Hz, 2H), 6.69 (d, *J =* 7.6 Hz, 1H), 5.74 – 5.62 (m, 1H), 4.00 (td, *J =* 10.6, 4.1 Hz, 1H), 3.72 (dt, *J =* 7.4, 3.1 Hz, 1H), 3.61 (td, *J =* 10.7, 8.5, 5.2 Hz, 1H), 2.65 – 2.42 (m, 2H), 2.32 (dq, *J =* 13.2, 4.3 Hz, 1H), 2.24 – 2.07 (m, 2H), 1.74 – 1.66 (m, 3H), 1.54 – 1.44 (m, 2H), 1.15 – 1.05 (m, 1H), 1.05 – 0.94 (m, 2H), 0.90 (t, *J =* 6.6 Hz, 7H), 0.76 (d, *J =* 6.9 Hz, 3H).

**13C NMR** (100 MHz, CDCl3) δ 185.1, 157.6, 154.2, 149.2, 147.5, 145.5, 137.7, 133.8, 132.7, 132.2, 128.6, 128.2, 127.8, 126.9, 126.2 (overlapped), 126.0, 125.6, 125.4, 124.7, 120.0, 115.5 (overlapped), 58.3, 55.0, 47.9, 42.7, 40.2, 34.4, 31.3, 29.0, 27.1, 26.0, 23.6, 22.1, 20.7, 16.5.

**HRMS (EI)**: m/z: [M]+ Calcd for, C38H40O2, 528.3028, found: 528.3025

**M.P.**: 91.5-93.2 oC.

**[α]D20** = 14.8 (c = 0.2, CHCl3).

**(4a*R*,9*R*,9a*S*)-2-(4-(((1*R*,2*R*,4*R*)-1,7,7-trimethylbicyclo[2.2.1] eptan-2-yl)oxy)phenyl)-3,4,4a,9a-tetrahydro-4'H-spiro[fluorene-9,1'-naphthalen]-4'-one (4b)**

The crude product was purified by column chromatography (petroleum ether/ethyl acetate = 50：1 to 30:1) to afford the product as white solid (72.6mg, 46% yield).

**1H NMR** (400 MHz, CDCl3) δ 8.25 (dd, *J =* 7.8, 1.6 Hz, 1H), 7.53 – 7.37 (m, 3H), 7.29 (td, *J =* 7.5, 1.2 Hz, 1H), 7.23 – 7.16 (m, 3H), 7.16 – 7.09 (m, 1H), 6.90 (d, *J =* 10.2 Hz, 1H), 6.78 – 6.72 (m, 2H), 6.68 (d, *J =* 7.6 Hz, 1H), 6.35 (d, *J =* 10.2 Hz, 1H), 5.67 (dd, *J =* 4.3, 2.0 Hz, 1H), 4.01 (dd, *J =* 6.4, 4.2 Hz, 1H), 3.72 (dt, *J =* 7.1, 3.1 Hz, 1H), 3.61 (ddd, *J =* 13.2, 8.5, 5.0 Hz, 1H), 2.61 – 2.44 (m, 2H), 2.36 – 2.24 (m, 1H), 1.85 – 1.48 (m, 6H), 1.10 (s, 2H), 1.04 (s, 3H), 0.96 (s, 3H), 0.85 (s, 3H).

**13C NMR** (100 MHz, CDCl3) δ 185.1, 157.2, 157.2, 154.2, 149.3, 147.5, 145.5, 137.7, 137.7, 133.4, 133.4, 132.7, 132.2, 128.6, 128.1, 127.8, 126.9, 126.1 (overlapped), 126.0, 125.6, 125.4, 124.7, 119.8, 119.8, 115.1 (overlapped), 84.4, 58.3, 55.0, 49.1, 46.9, 45.2, 42.7, 39.4, 39.3, 34.1, 29.0, 27.3, 27.1, 27.1, 20.3, 20.1, 11.7.

**HRMS (EI)**: m/z: [M]+ Calcd for, C38H38O2, 526.2872, found: 526.2869.

**M.P.**: 98.7-100.5 oC.

**[α]D20**= 65.5 (c = 0.2, CHCl3).

**(4a*R*,9*R*,9a*S*)-6-methoxy-2-(4-(((*S*)-4-(prop-1-en-2-yl) cyclohex-1-en-1-yl)methoxy)phenyl)-3,4,4a,9a-tetrahydro-4'H-spiro[fluorene-9,1'-naphthalen]-4'-one** (**4c**).

The crude product was purified by column chromatography (petroleum ether/ethyl acetate = 50：1 to 30:1) to afford the product as white solid (66.9 mg, 54% yield).

**1H NMR** (400 MHz, CDCl3) δ 8.24 (d, *J =* 7.8, 1.6 Hz, 1H), 7.50 (t, *J =* 7.5, 1.6 Hz, 1H), 7.41 (t, 1H), 7.22 (d, *J =* 8.8 Hz, 3H), 6.97 (d, *J =* 2.5 Hz, 1H), 6.90 (d, *J =* 10.2 Hz, 1H), 6.82 (d, *J =* 8.7 Hz, 2H), 6.72 (dd, *J =* 8.4, 2.5 Hz, 1H), 6.60 (d, *J =* 8.4 Hz, 1H), 6.35 (d, *J =* 10.1 Hz, 1H), 5.81 (dd, *J =* 4.7, 2.5 Hz, 1H), 5.68 (dd, *J =* 4.4, 2.0 Hz, 1H), 4.72 (d, *J =* 4.3, 2.8 Hz, 2H), 4.36 (s, 2H), 3.83 (s, 3H), 3.77 – 3.70 (m, 1H), 3.62 – 3.52 (m, 1H), 2.64 – 2.45 (m, 2H), 2.37 – 2.26 (m, 1H), 2.17 (d, *J =* 11.9, 10.6, 4.4 Hz, 3H), 2.03 – 1.93 (m, 1H), 1.86 (ddq, *J =* 12.5, 5.0, 2.3 Hz, 1H), 1.73 (s, 3H), 1.71 – 1.60 (m, 2H), 1.51 (dtd, *J =* 12.5, 10.5, 6.4 Hz, 1H).

**13C NMR** (100 MHz, CDCl3) δ 185.3, 160.1, 158.4, 154.8, 149.7, 149.6, 149.1, 137.7, 137.4, 134.1, 133.5, 132.8, 132.3, 128.7, 127.0, 126.2 (overlapped), 126.1, 125.5, 125.1, 120.3, 114.6 (overlapped), 114.0, 109.9, 108.8, 72.3, 57.7, 55.6, 55.5, 42.9, 41.0, 30.5, 29.1, 27.4, 27.2, 26.3, 20.8.

**HRMS (EI)**: m/z: [M]+ Calcd for, C39H38O3, 554.2821, found: 554.2817.

**M.P.**: 118.0-119.9 oC.

**[α]D20** = 42.4 (c = 0.2, CHCl3).

1. Gram-scale synthesis.

To a sealed tube was added Pd2(dba)3 (229 mg, 5 mol%), (Sc,Rs)-PC10 (20 mol%, 783.47 mg) and K2HPO4(2.0 equiv., 1.74 g), the flask was evacuated and refilled with argon. Then 25 mL mestiylene was added to the tube under nitrogen atmosphere, and stirred at room temperature for 1 h. Then **1a** (5 mmol, 975 mg) and 1,3-diene **2a** (3.0 equiv, 1.40 g)was added in the condition of nitrogen flow, and the tube was allowed to stirr at 60 °C for 96 h. After the reaction was complete (monitored by TLC), diluted with 50 mL saturated salt water and 20 mL EtOAc, then extracted with 20 mL EtOAc (× 2), dried over anhydrous Na2SO4, the solvent was removed under reduced pressure. The crude product was purified by column chromatography (PE/EtOAc/DCM = 100:1:1 to PE/EtOAc/DCM = 50:1:1) to give **3aa** (63% yield, 1.17 g, 96% ee), as a white solid.

1. Synthetic applications of the products.

**Compound 55:** To a solution of **3aa** (96% *ee*, 0.2 mmol, 74.8 mg) in MeOH (2 mL) at room temperature was added CeCl3·7H2O (74.5 mg, 0.2 mmol), and the suspension was stirred for 10 min. After the reaction was cooled down to 0 °C, NaBH4 (75.6 mg, 2.0 mmol) was added to the reaction, and the reaction was stirred for 30 min, and then quenched with water. After a half of solvent was evaporated in vacuo, the mixture was diluted with EtOAc, washed with brine, and then dried over anhydrous Na2SO4. The organic layer was dried over Na2SO4 filtered, and concentrated on a rotary evaporator. The crude product was purified by column chromatography (PE/EtOAc = 7:1) to give **6** (52 % yield, 39.1 mg) as a white solid.; The absolute configuration of **6** was confirmed by COSY and NOESY spectra.

**1H NMR** (400 MHz, CDCl3) δ 7.71 (dt, *J =* 7.8, 1.1 Hz, 1H), 7.47 – 7.36 (m, 1H), 7.35 – 7.25 (m, 6H), 7.23 – 7.15 (m, 3H), 6.96 (dd, *J =* 7.9, 1.3 Hz, 1H), 6.82 (d, *J =* 7.6 Hz, 1H), 6.03 (dd, *J =* 10.2, 2.7 Hz, 1H), 5.91 – 5.63 (m, 2H), 5.36 – 4.92 (m, 1H), 3.49 (ddd, *J =* 12.3, 8.2, 4.9 Hz, 1H), 3.38 (ddt, *J =* 8.2, 4.1, 2.0 Hz, 1H), 2.52 (ddt, *J =* 8.7, 4.4, 2.0 Hz, 2H), 2.22 (dq, *J =* 13.3, 4.4 Hz, 1H), 1.98 (d, *J =* 8.7 Hz, 1H), 1.70 (ddt, *J =* 13.2, 11.8, 7.8 Hz, 1H).

**13C NMR** (100 MHz, CDCl3) δ 149.2, 146.7, 142.2, 141.4, 138.1, 137.8, 135.1, 128.2 (overlapped), 128.1, 128.0, 127.6, 127.4, 127.0, 127.0, 126.8, 126.5, 125.7, 125.2 (overlapped), 124.1, 123.4, 77.0, 64.9, 56.9, 55.8, 42.2, 28.5, 26.9.

**HRMS (EI)**: m/z: [M]+ Calcd for, C28H24O, 376.1827, found: 376.1822.

**M.P.**: 98.7-100.5 oC.

**[α]D20** = 40.9 (c = 0.2, CHCl3).

**HPLC conditions:** Daicel Chiralpak IB column (90:10 n-Hexane: 2-Propanol, 0.5 mL/min, 254 nm); tr (minor) = 12.8 min, tr (major) = 11.4 min; 96% *ee*).


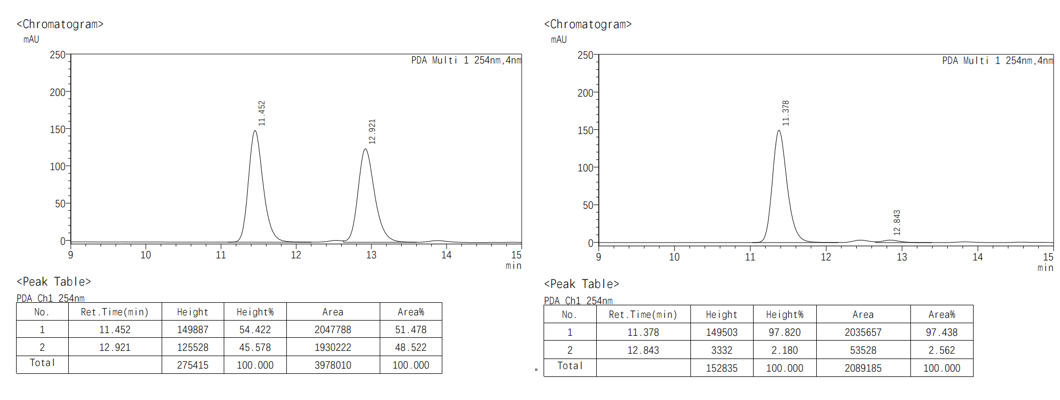


**Compound 6:**5To a solution of **3aa** (96% *ee*, 0.2 mmol, 74.8 mg) in MeOH (2 mL) at room temperature was added CeCl3·7H2O (74.5 mg, 0.2 mmol), and the suspension was stirred for 10 min. After the reaction was cooled down to 0 °C, NaBH4 (75.6 mg, 2.0 mmol) was added to the reaction, and the reaction was stirred for 30 min, and then quenched with water. After a half of solvent was evaporated in vacuo, the mixture was diluted with EtOAc, washed with brine, and then dried over anhydrous Na2SO4. The organic layer was dried over Na2SO4 filtered, and concentrated on a rotary evaporator. After concentration in vacuo, the obtained residue was directly utilized for the next reaction. To a stirred solution of the crude product in CH3CN (3.0 mL) at room temperature was added TsOH·H2O (28.5 mg, 0.2 mmol). After being stirred for 30 min at room temperature, the reaction mixture was quenched with sat. aq. NaHCO3 solution. Aqueous layer was extracted with EtOAc, and the combined organic layers were washed with brine. The crude product was purified by column chromatography (PE/EtOAc = 100:1) to give **7** (48 % yield, 35 mg) as a white solid.; The absolute configuration of **5** was confirmed by COSY and NOESY spectra of ***ent*-5**.

**1H NMR** (400 MHz, CDCl3) δ 8.54 (d, *J =* 8.1 Hz, 1H), 7.93 (d, *J =* 7.5, 1.7 Hz, 1H), 7.84 (d, *J =* 7.4, 2.0 Hz, 1H), 7.76 (d, *J =* 8.4 Hz, 1H), 7.54 (d, *J =* 8.4 Hz, 1H), 7.50 – 7.40 (m, 5H), 7.38 – 7.28 (m, 4H), 7.25 (d, *J =* 7.1 Hz, 1H), 6.62 (s, 1H), 3.89 (t, *J =* 5.6 Hz, 1H), 3.14 (dd, *J =* 10.1, 5.5 Hz, 1H), 2.58 (ddd, *J =* 15.8, 7.9, 2.1 Hz, 1H), 2.50 – 2.41 (m, 1H), 2.17 – 1.82 (m, 2H).

**13C NMR** (100 MHz, CDCl3) δ 141.9, 138.2, 133.6, 133.0, 130.3, 129.8, 129.1, 128.4, 128.3 (overlapped), 127.8, 127.3, 127.1, 126.2, 126.0 (overlapped), 125.9, 125.4 (overlapped), 125.0, 124.8, 77.0, 23.7 (overlapped).

**HRMS (EI)**: m/z: [M]+ Calcd for, C28H24O, 358.1722, found: 358.1716.

**M.P.**: 62.6-64.5 oC.

**[α]D20** = 112.2 (c = 0.2, CHCl3).

**HPLC conditions:** Daicel Chiralpak IB column (98:2 n-Hexane: 2-Propanol, 0.5 mL/min, 254 nm); tr (minor) = 14.9 min, tr (major) = 13.0 min; 93% *ee*).


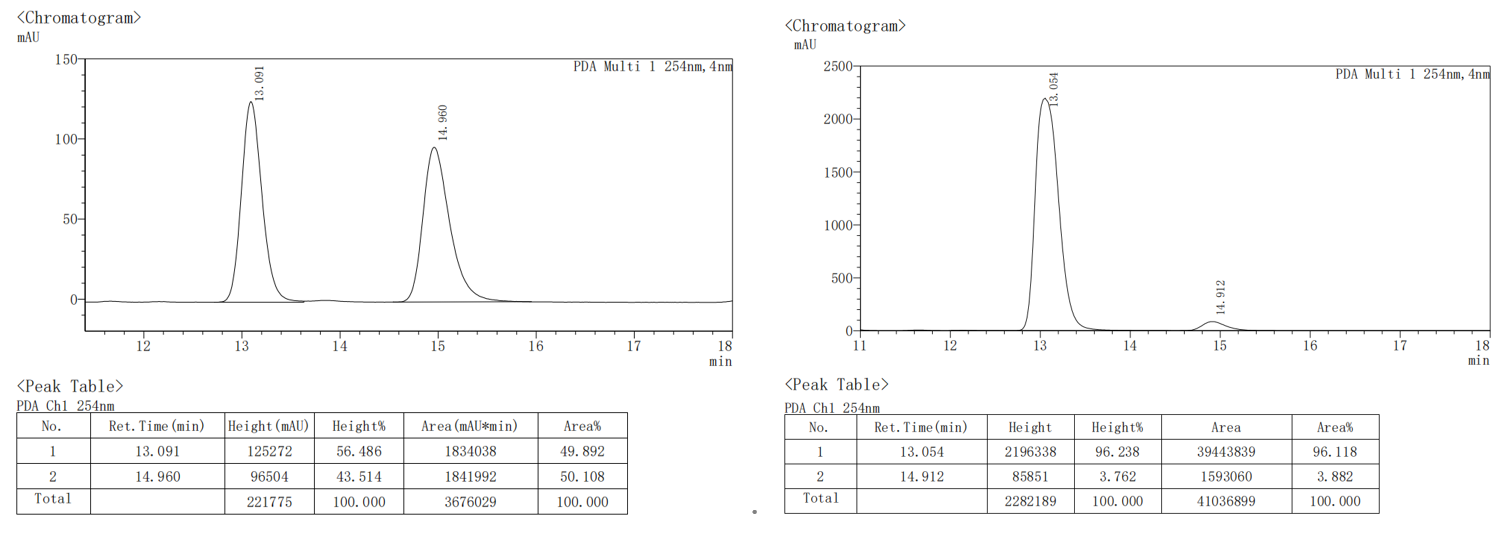


**Compound 71:** To a solution of **3aa** (96% ee, 0.2 mmol, 74.8 mg) in DCM (4 mL) was sequentially added an aqueous solution of Na2CO3 (127.2 mg, 6.0 equiv.) and 3-chloroperoxybenzoic acid (m-CPBA, 138 mg, 4.0 eq., cas: 937-14-4) at room temperature. The reaction mixture was stirred for 2 h and poured into a saturated solution of aqueous NaHCO3. The two layers were separated and the organic layer was washed with a saturated solution of aqueous NaHCO3. The organic layer was dried over Na2SO4 filtered, and concentrated on a rotary evaporator. The crude product was purified by column chromatography (PE/EtOAc = 7:1) to give 6 (55 % yield, 42.9 mg) as a white solid.; The absolute configuration of **5** was confirmed by COSY and NOESY spectra.;

**1H NMR** (400 MHz, CDCl3) δ 8.18 (dd, *J =* 7.8, 1.5 Hz, 1H), 7.58 – 7.43 (m, 1H), 7.40 (dd, *J =* 7.7, 3.1 Hz, 2H), 7.39 – 7.21 (m, 6H), 7.17 (t, *J =* 7.4 Hz, 1H), 7.11 (d, *J =* 7.9 Hz, 1H), 6.97 (d, *J =* 10.3 Hz, 1H), 6.72 (d, *J =* 7.7 Hz, 1H), 6.38 (d, *J =* 10.3 Hz, 1H), 3.69 (td, *J =* 8.4, 5.2 Hz, 1H), 3.58 (d, *J =* 8.8 Hz, 1H), 2.94 (s, 1H), 2.42 (ddd, *J =* 14.7, 7.2, 4.7 Hz, 1H), 2.34 – 2.22 (m, 1H), 2.14 (ddd, *J =* 14.2, 8.6, 4.5 Hz, 1H), 1.91 – 1.78 (m, 1H).

**13C NMR** (100 MHz, CDCl3) δ 184.6, 151.4, 149.2, 146.2, 145.4, 141.4, 133.2, 131.3, 128.6, 128.5 (overlapped), 128.3, 128.2, 127.7, 127.5, 127.3, 126.3, 125.1, 124.9 (overlapped), 124.7, 61.8, 60.7, 56.7, 52.9, 40.9, 27.0, 25.8.

**HRMS (EI)**: m/z: [M]+ Calcd for, C28H22O2, 390.1620, found: 390.1611.

**M.P.**: 194.3-197.3 oC.

**[α]D20** = 45.9 (c = 0.2, CHCl3).

**HPLC conditions:** Daicel Chiralpak IB column (85:15 n-Hexane: 2-Propanol, 0.5 mL/min, 254 nm); tr (minor) = 15.3 min, tr (major) = 17.5 min; 96% *ee*).


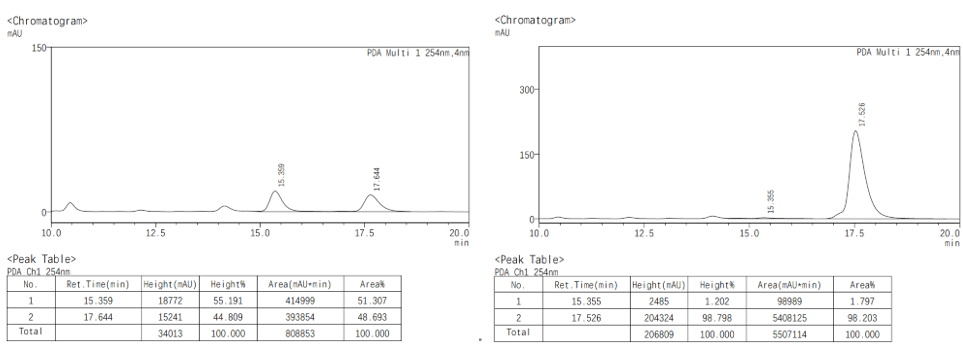


1. NMR Spectra


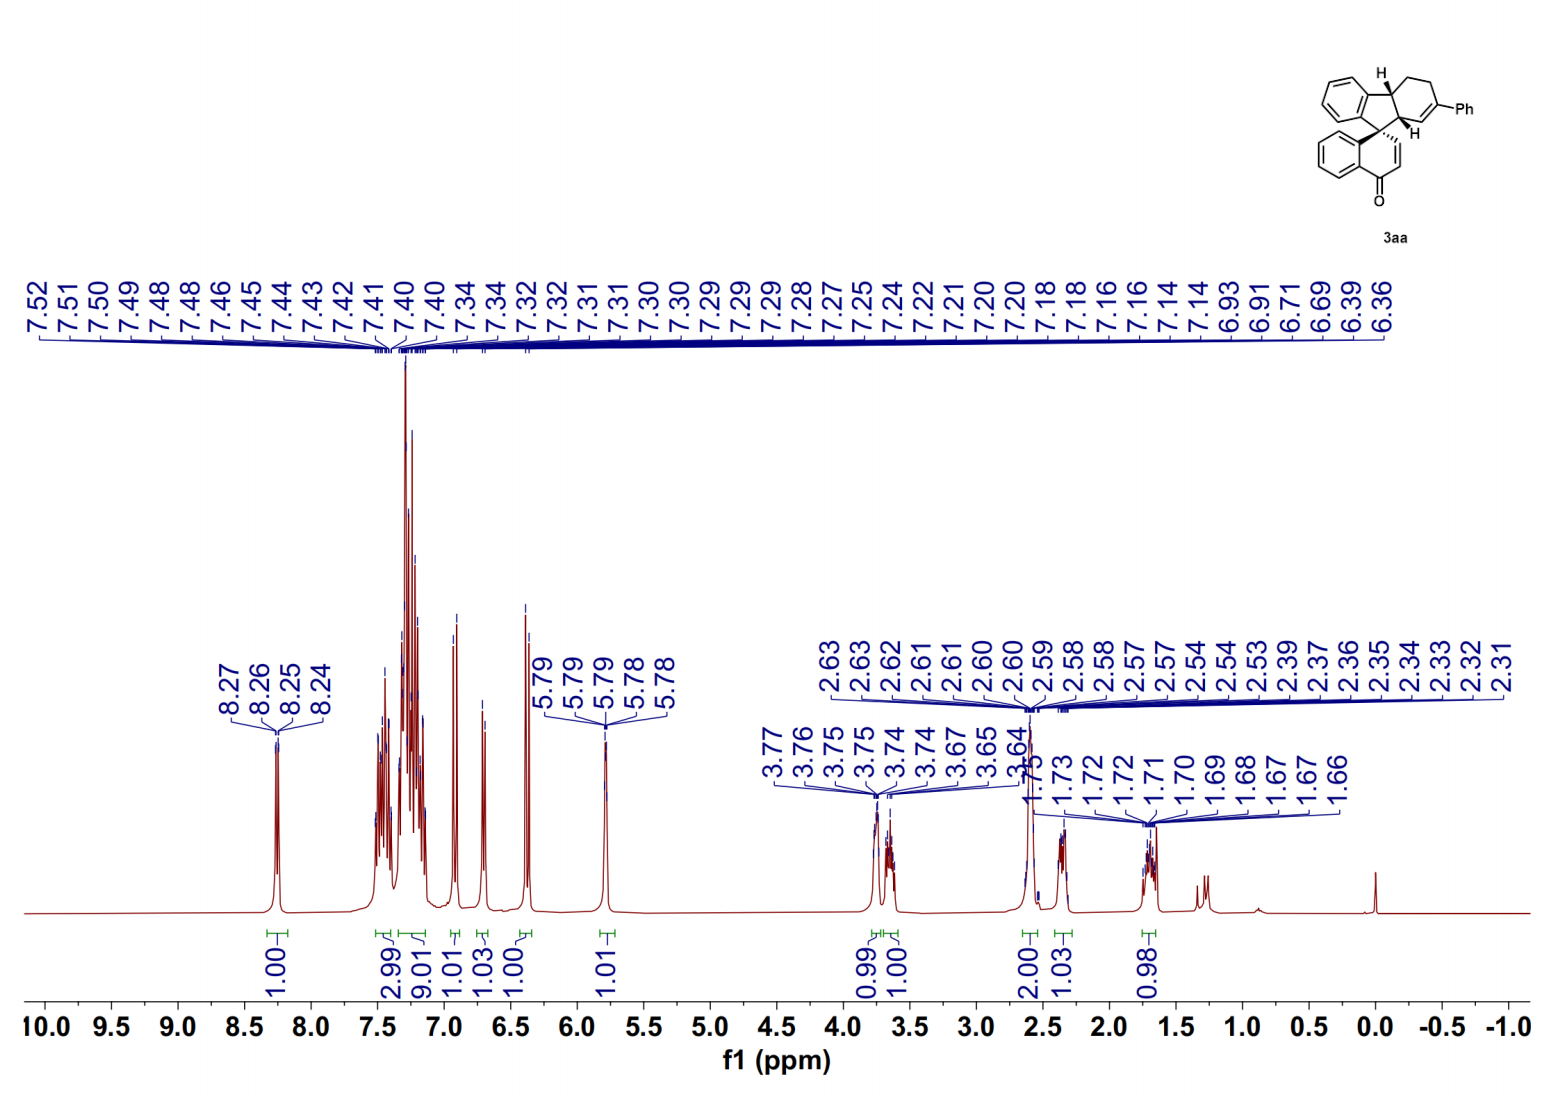

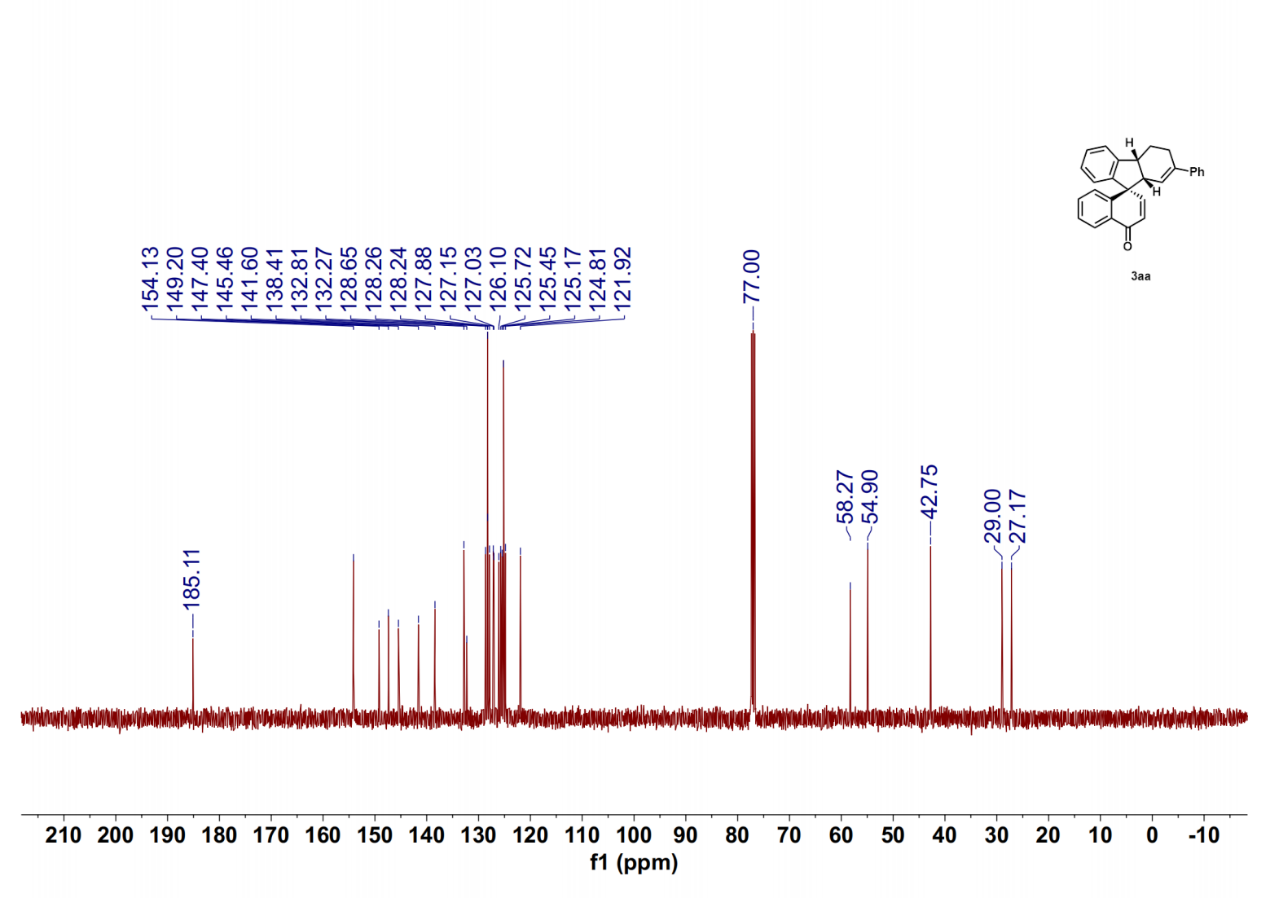

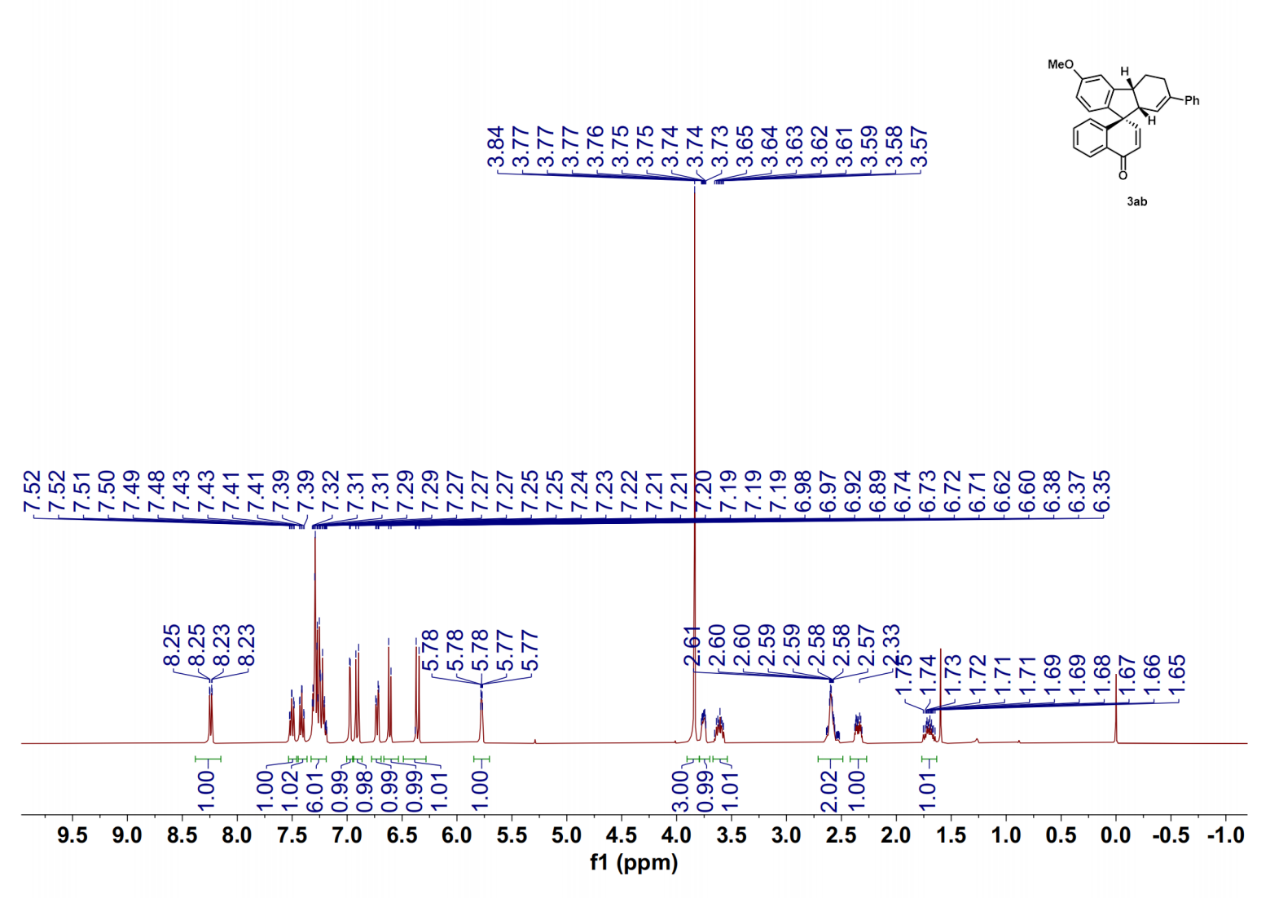

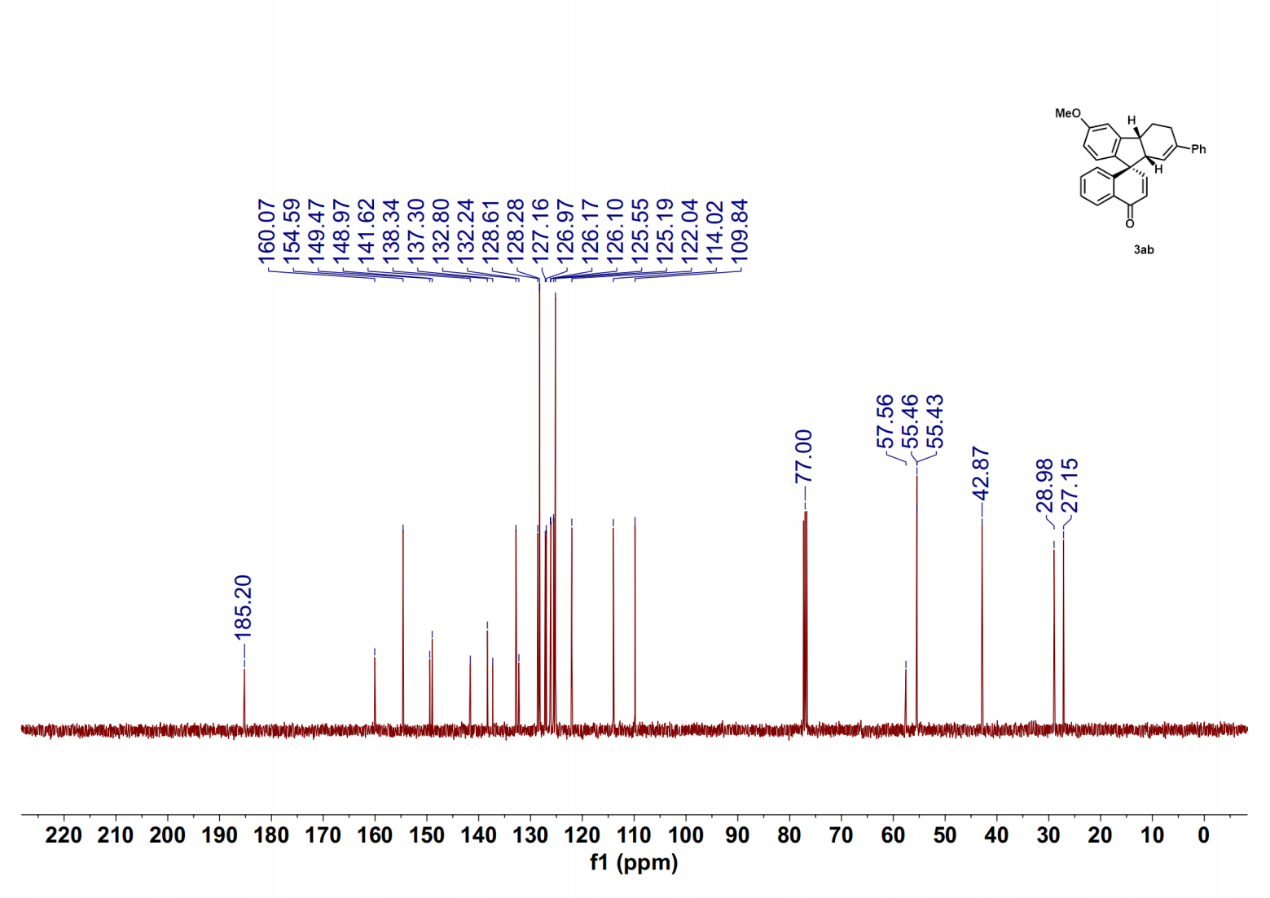

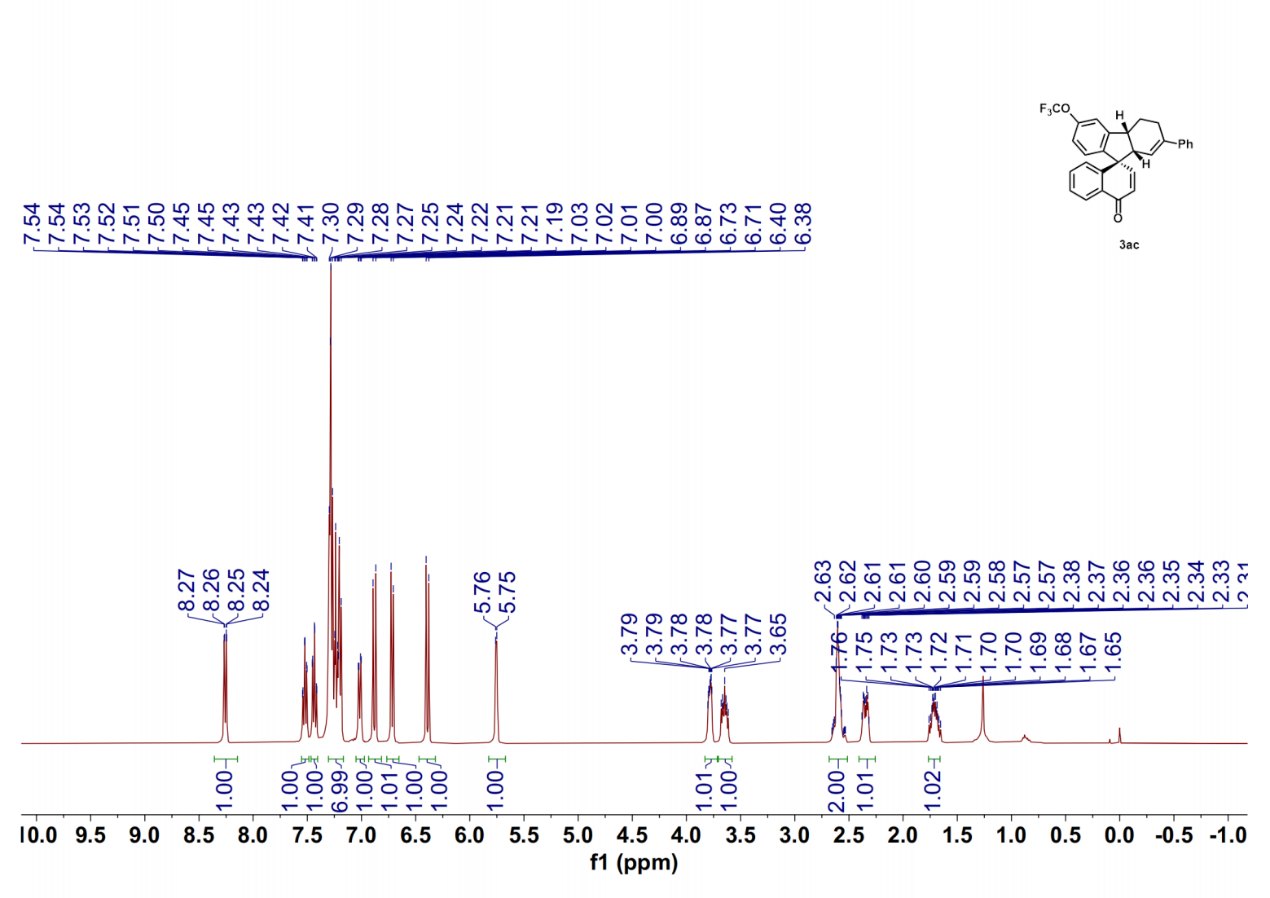

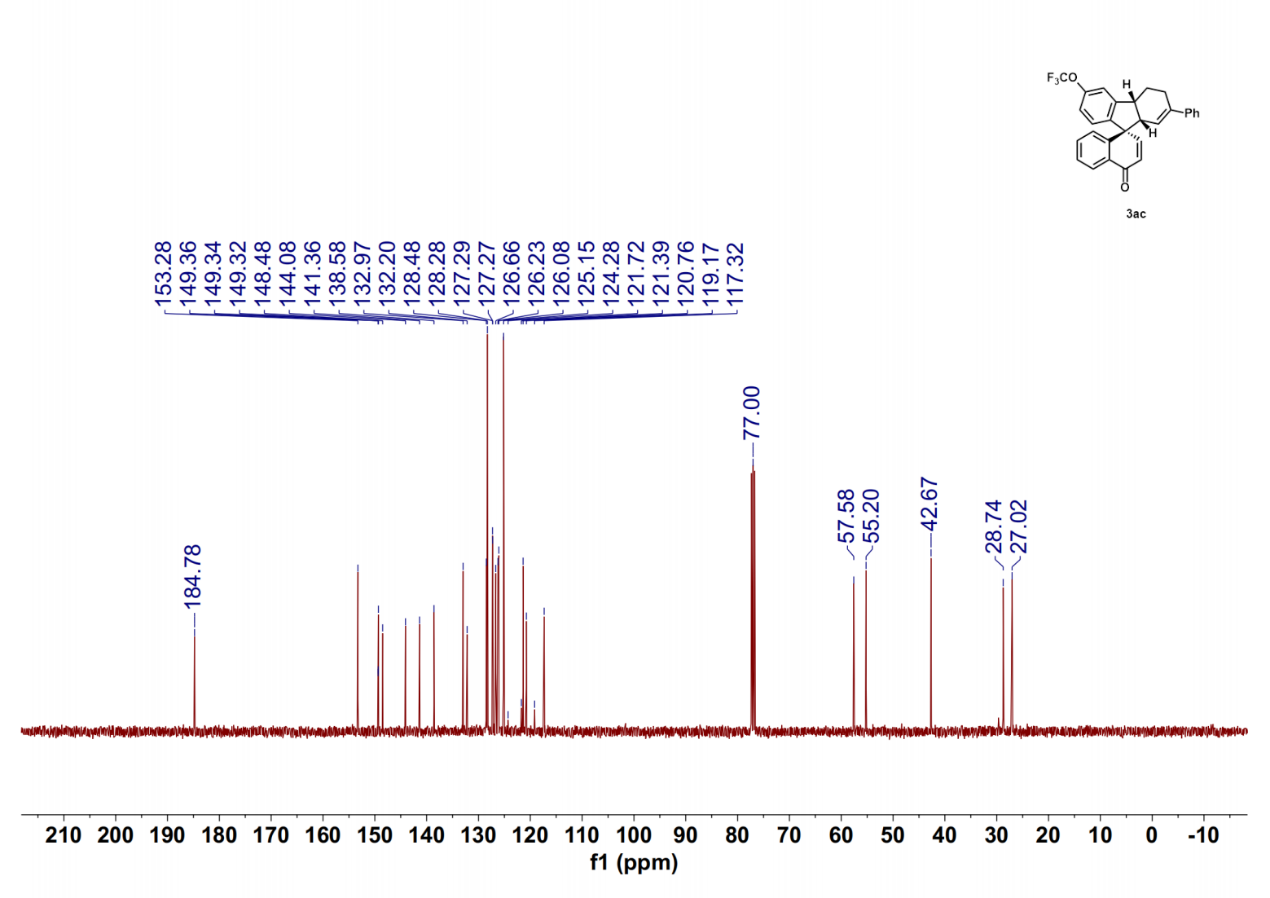

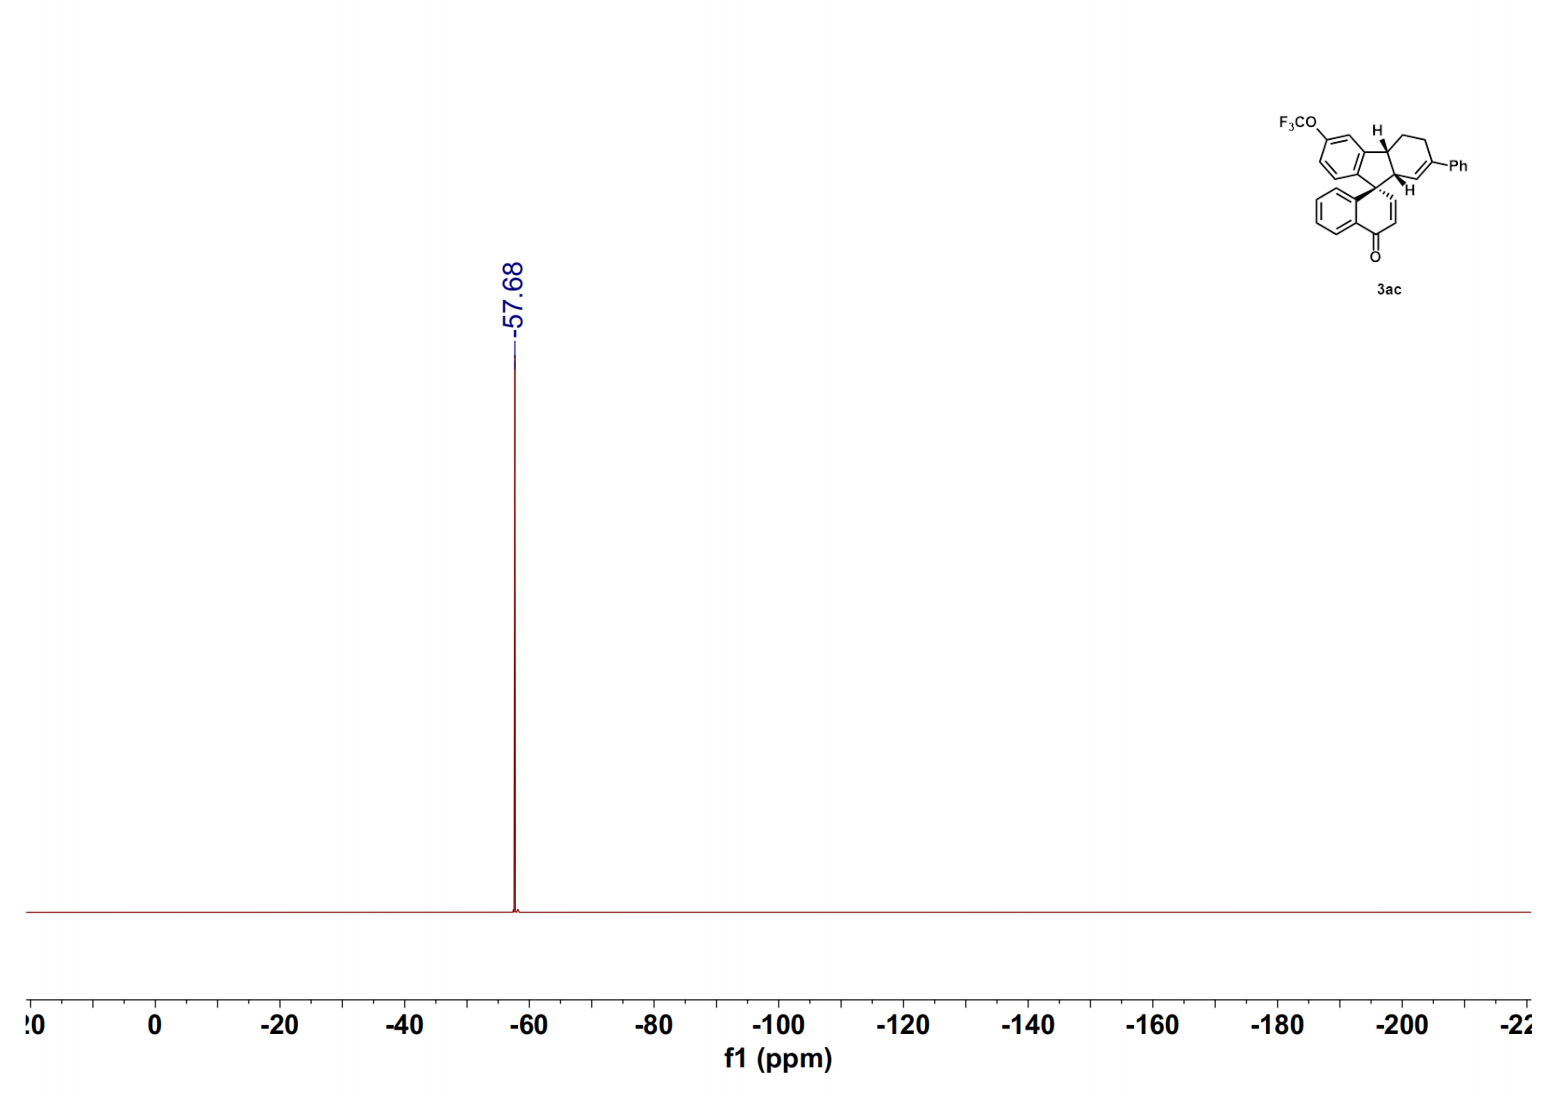

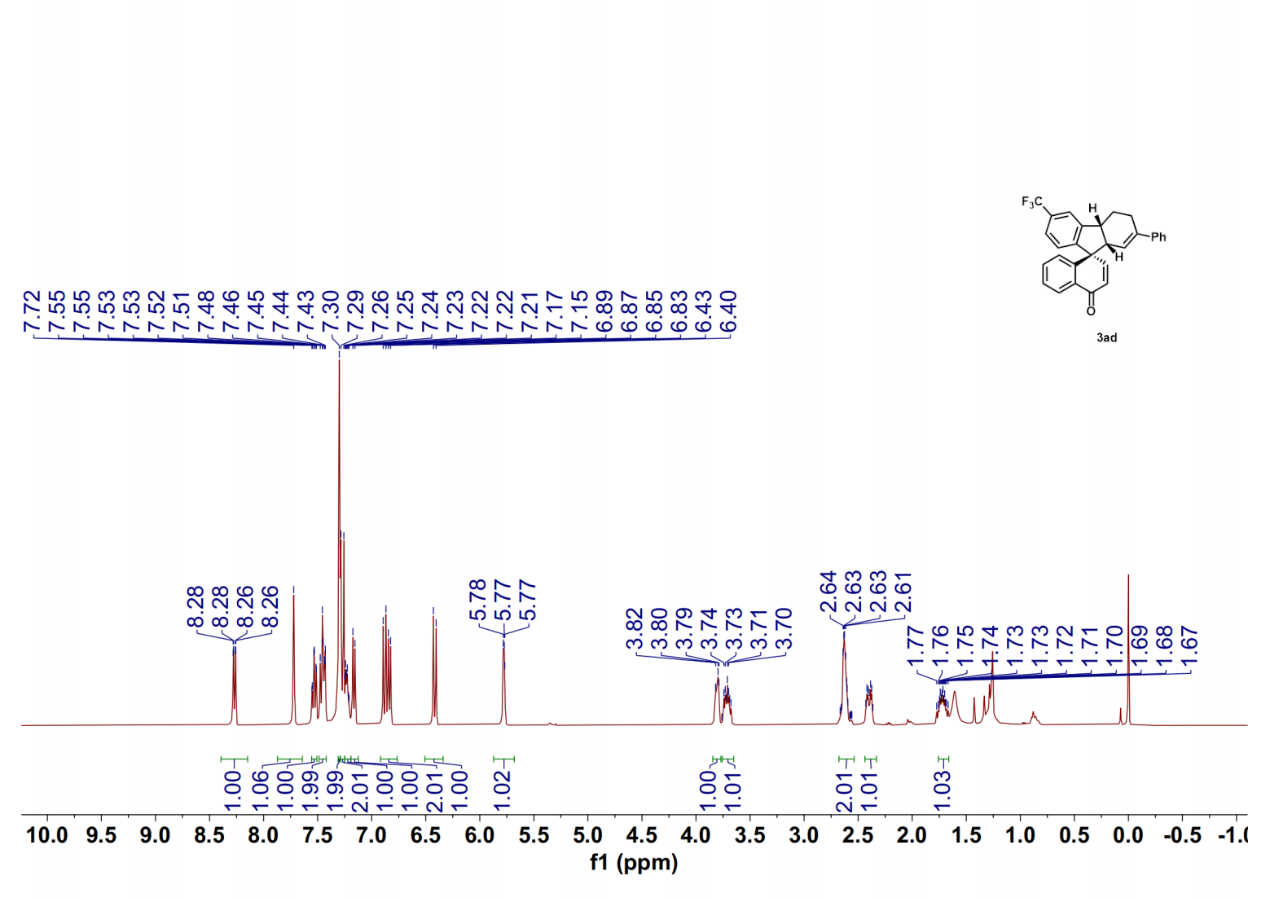

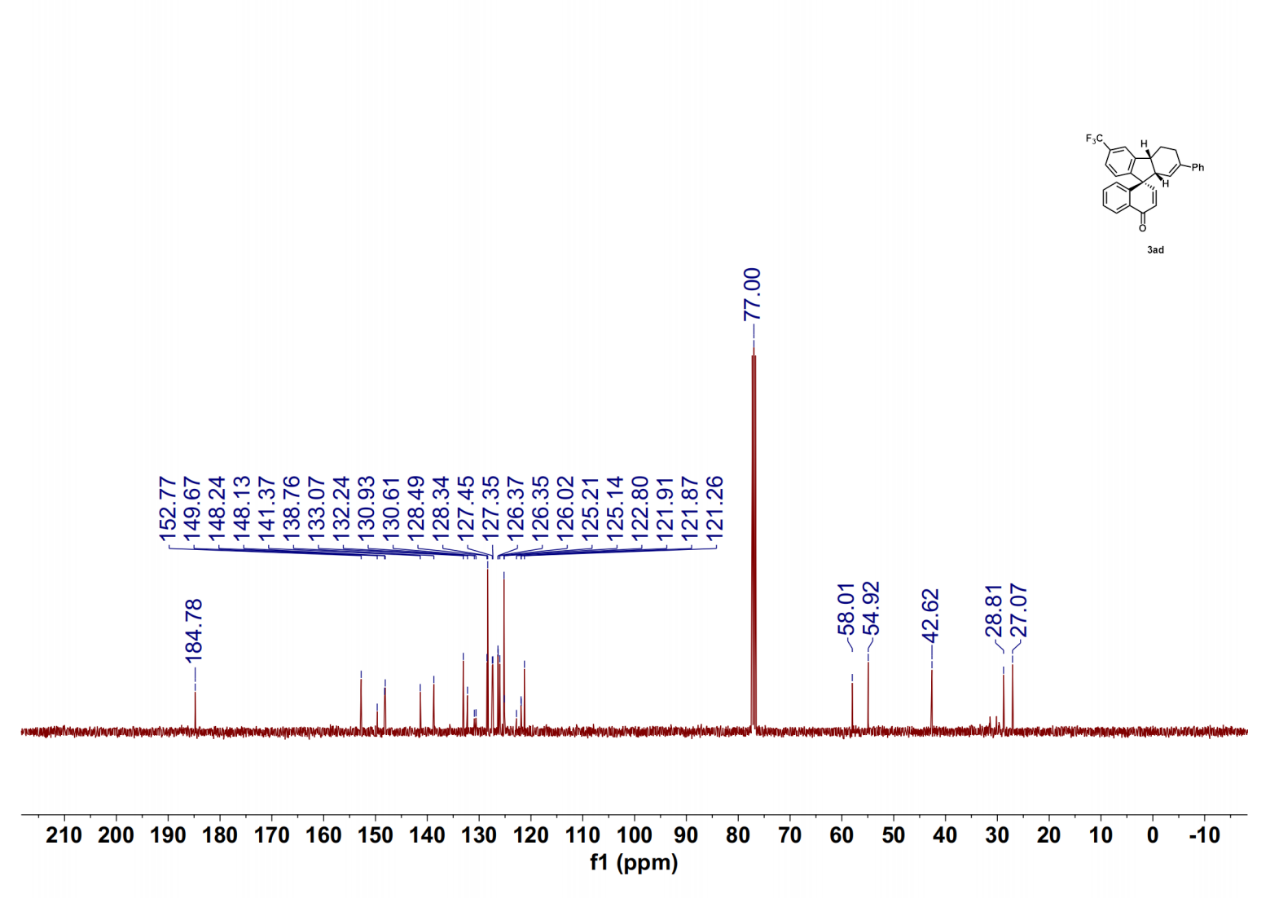

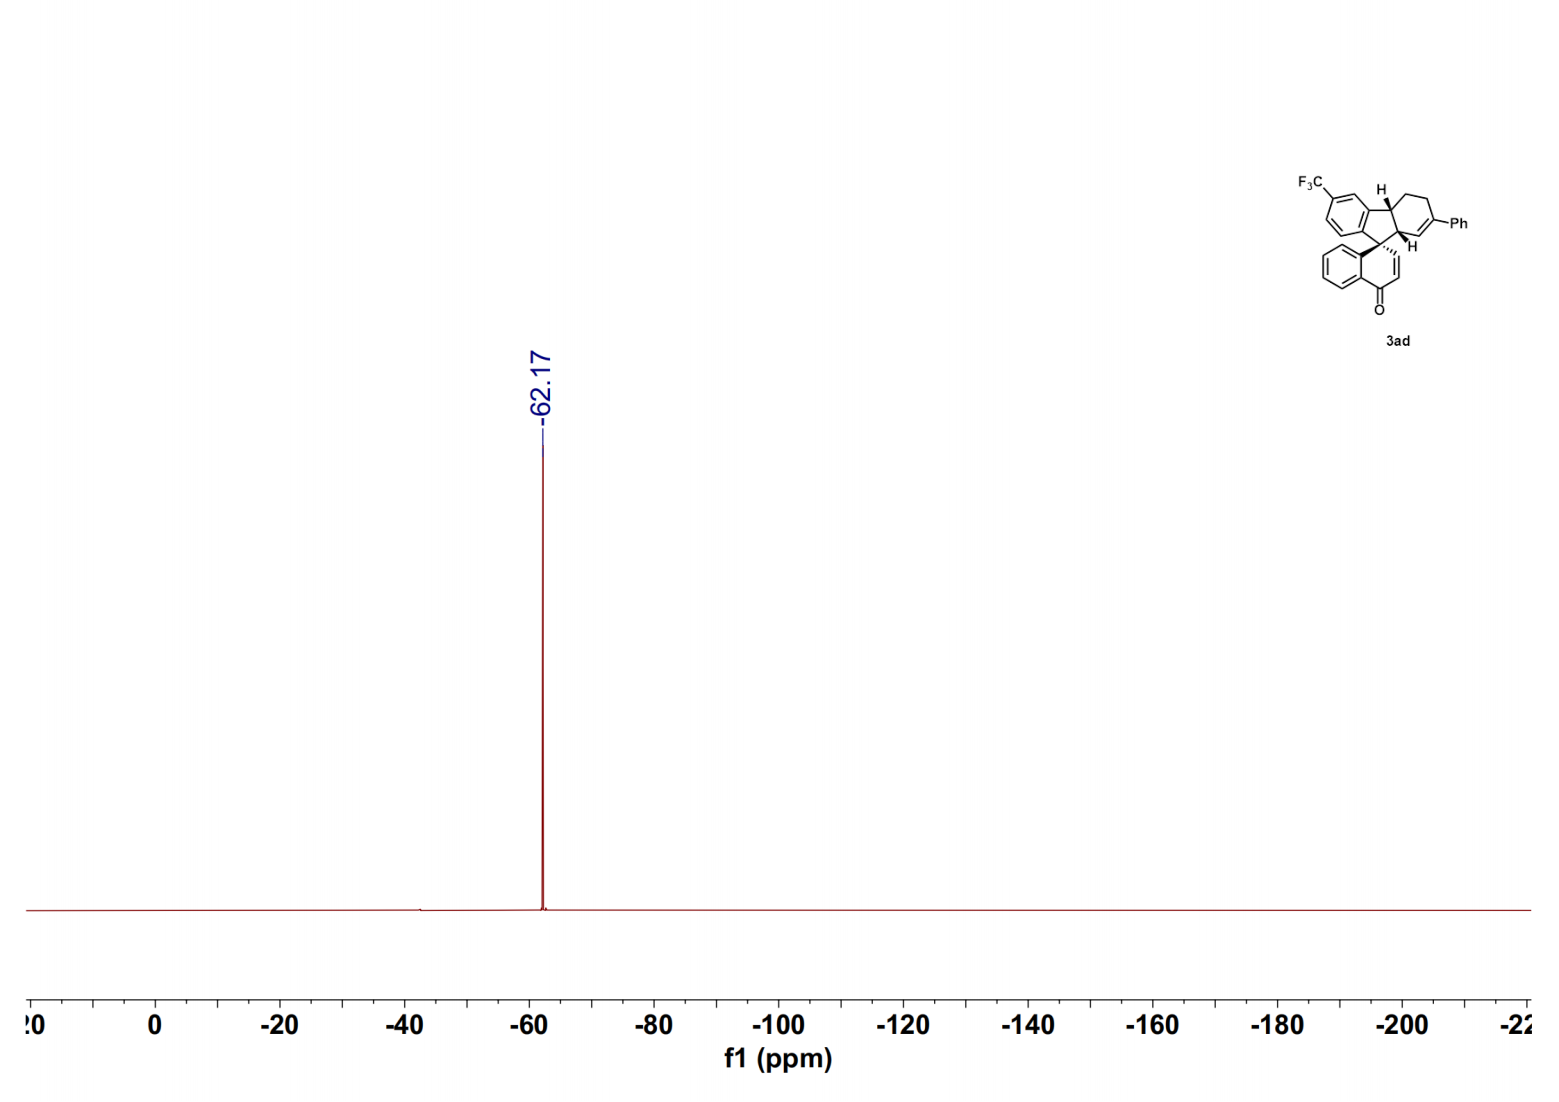

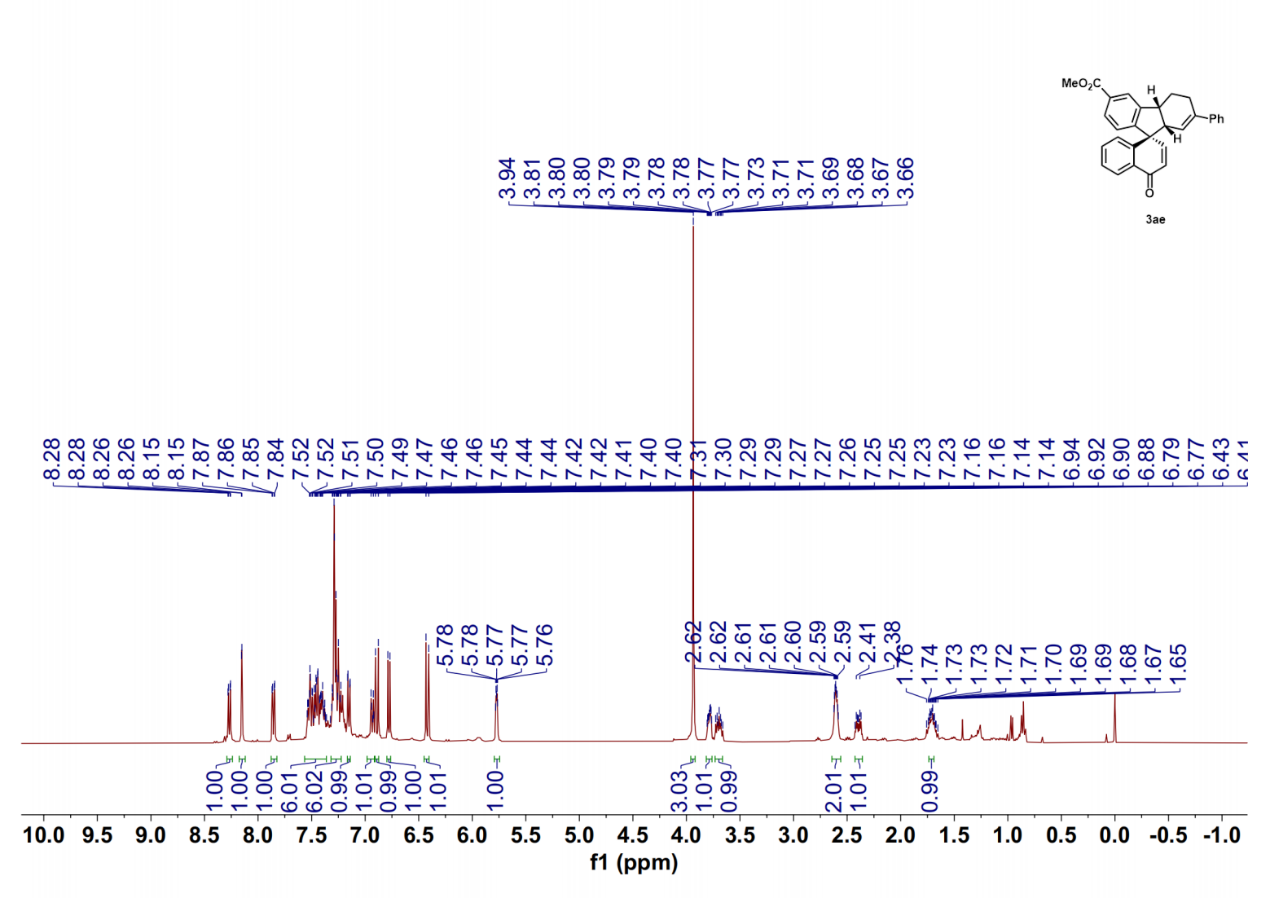

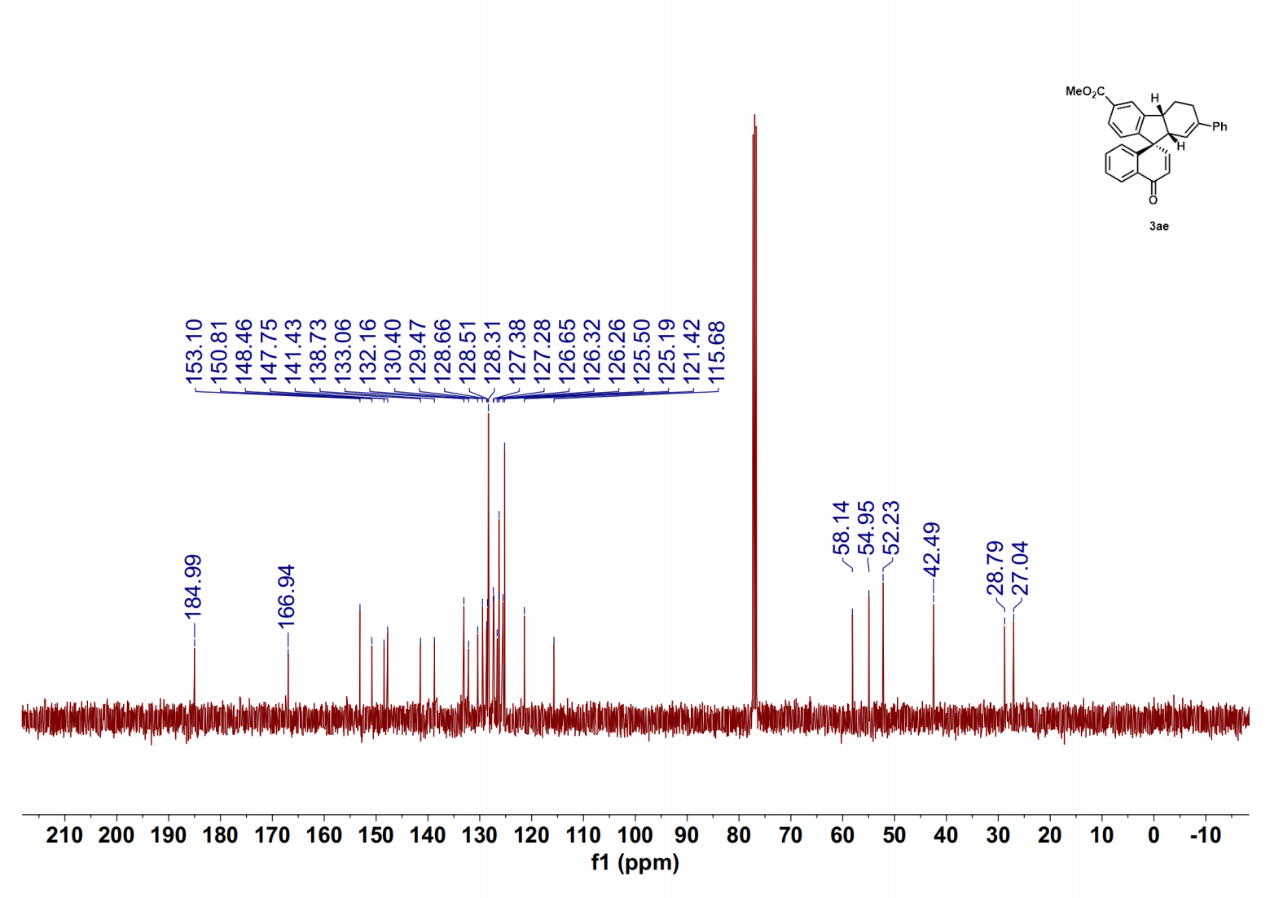

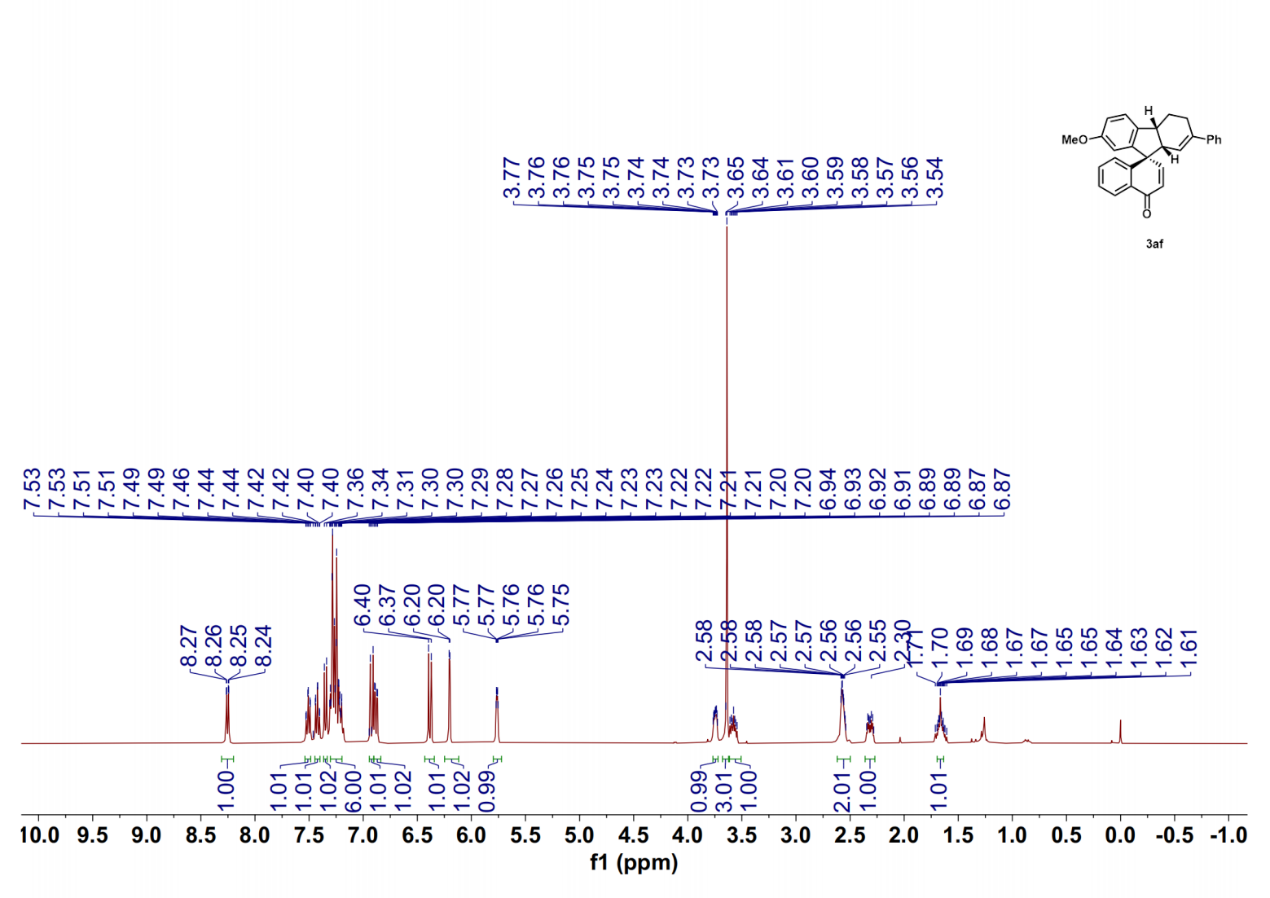

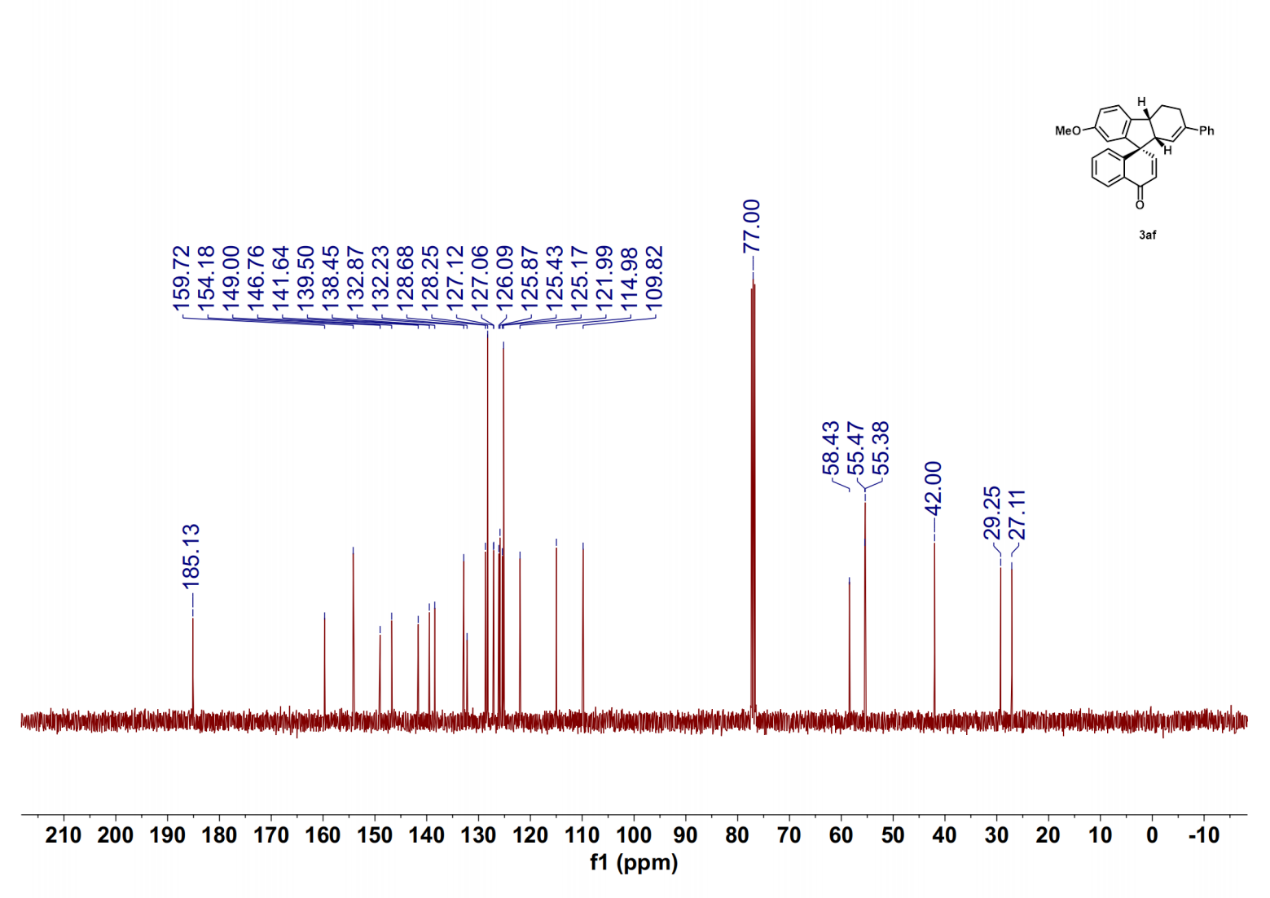

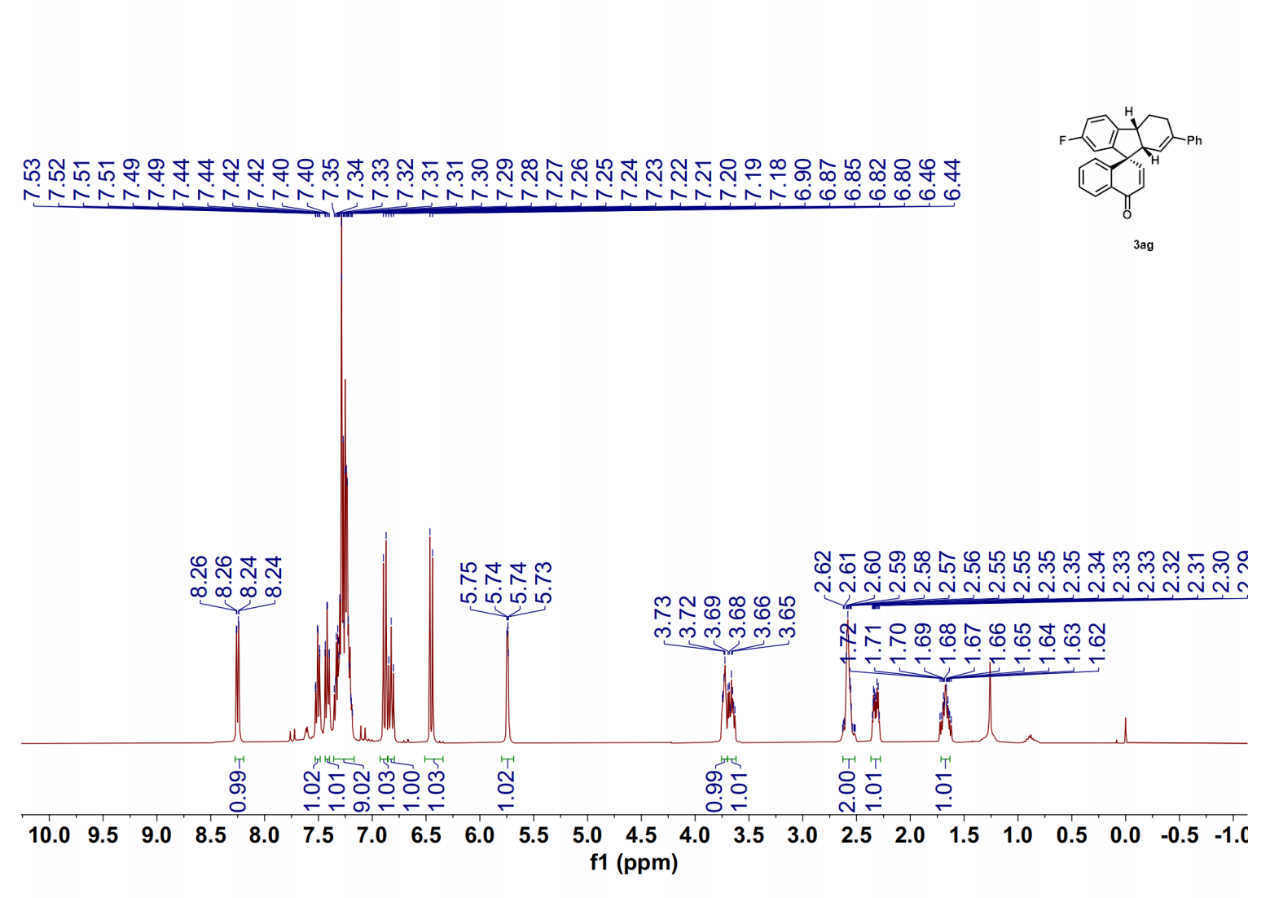

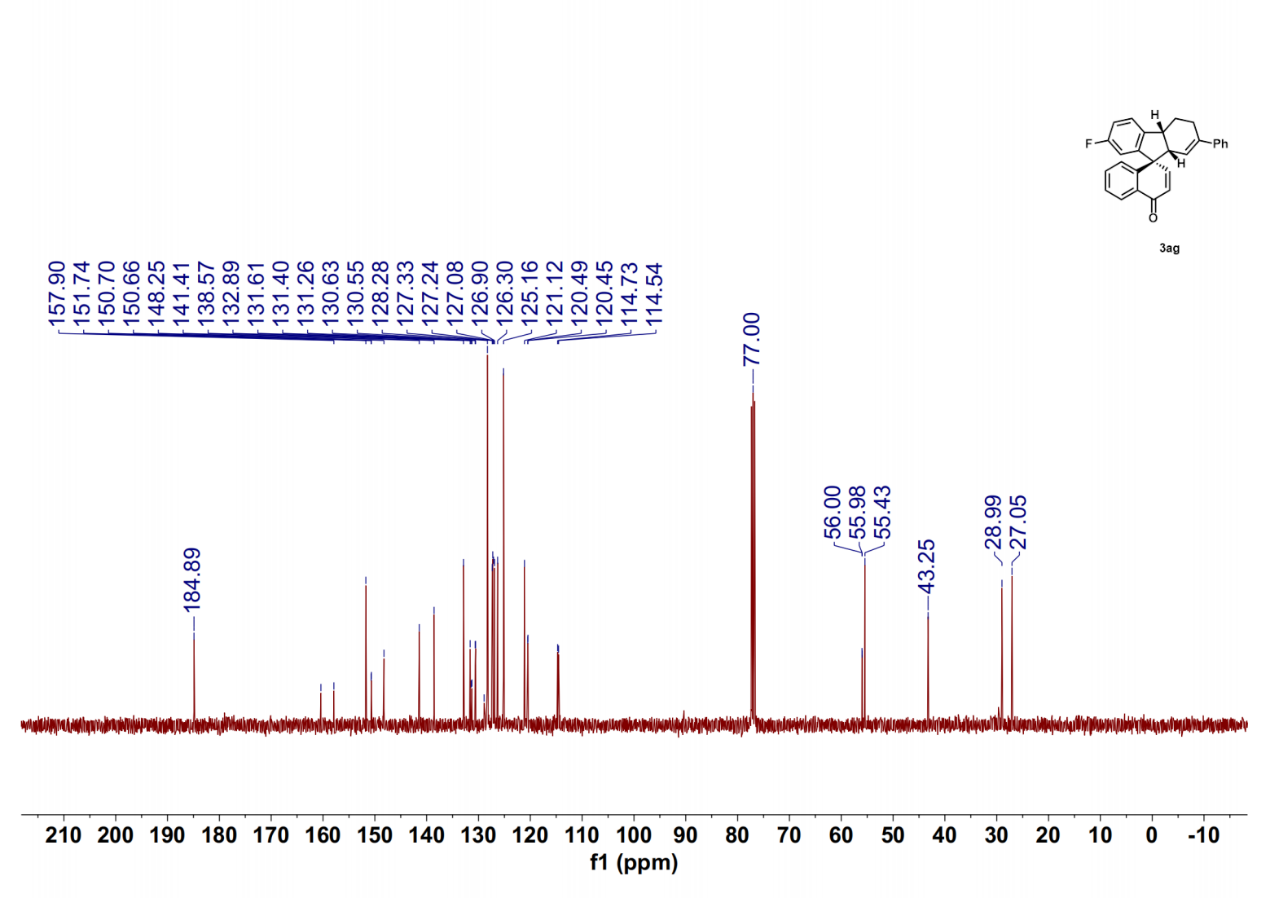

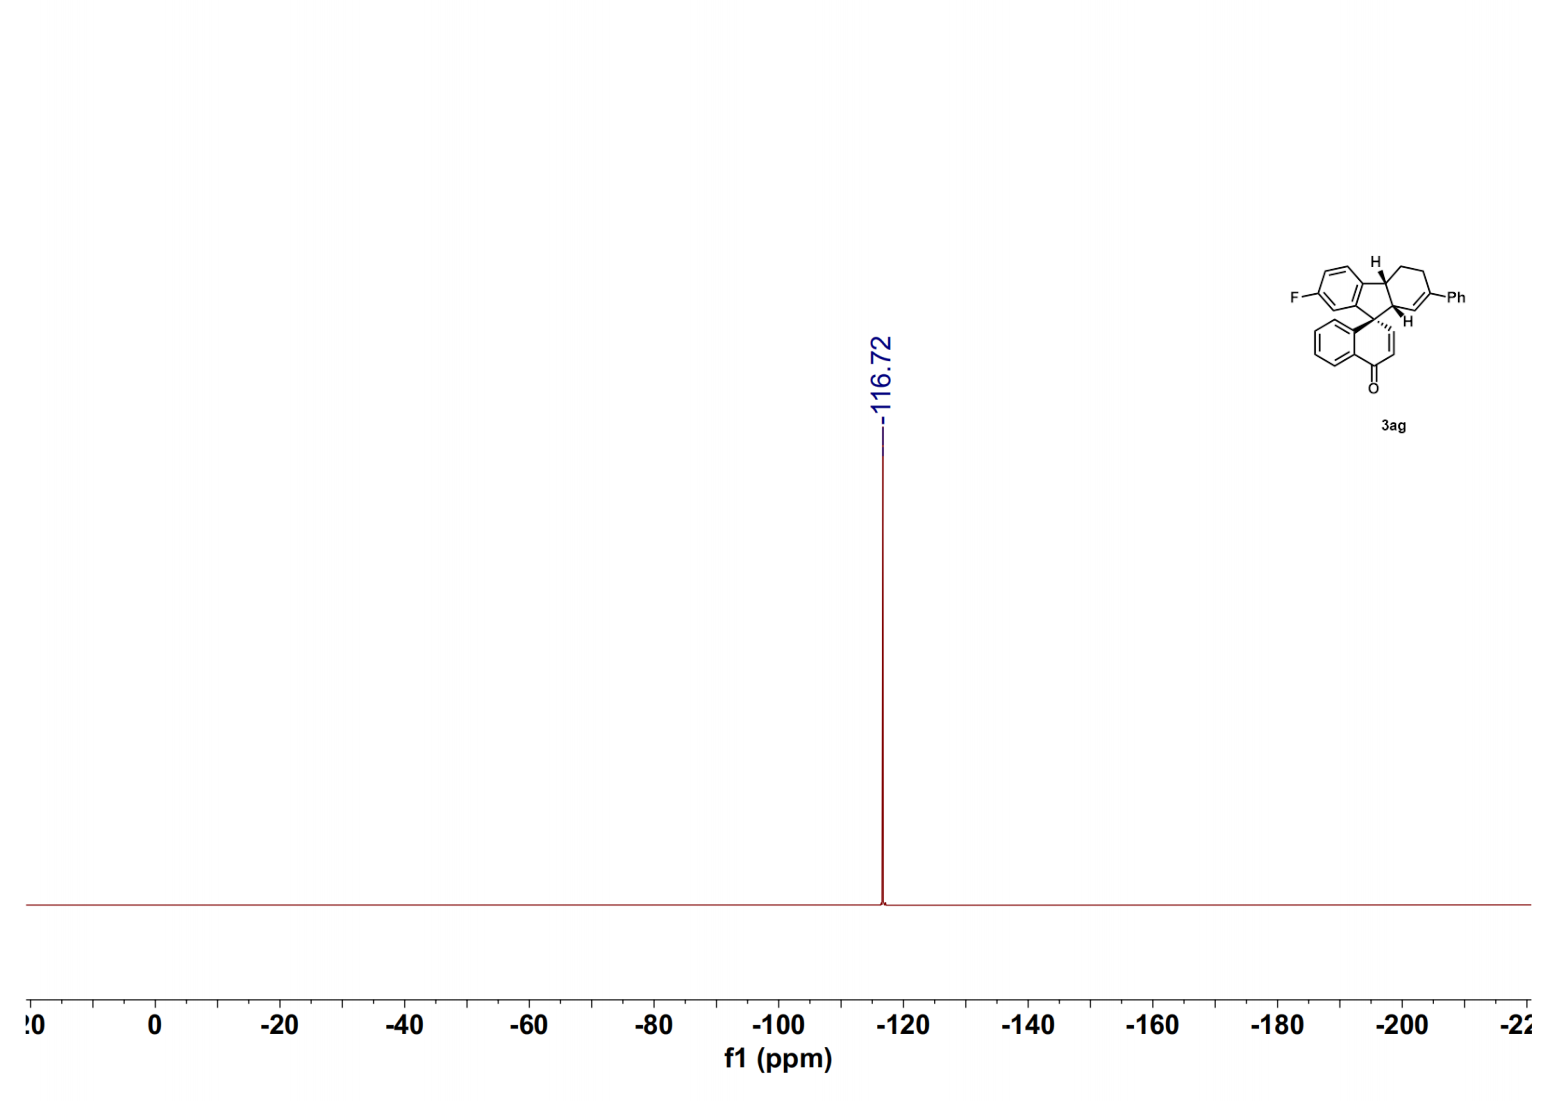

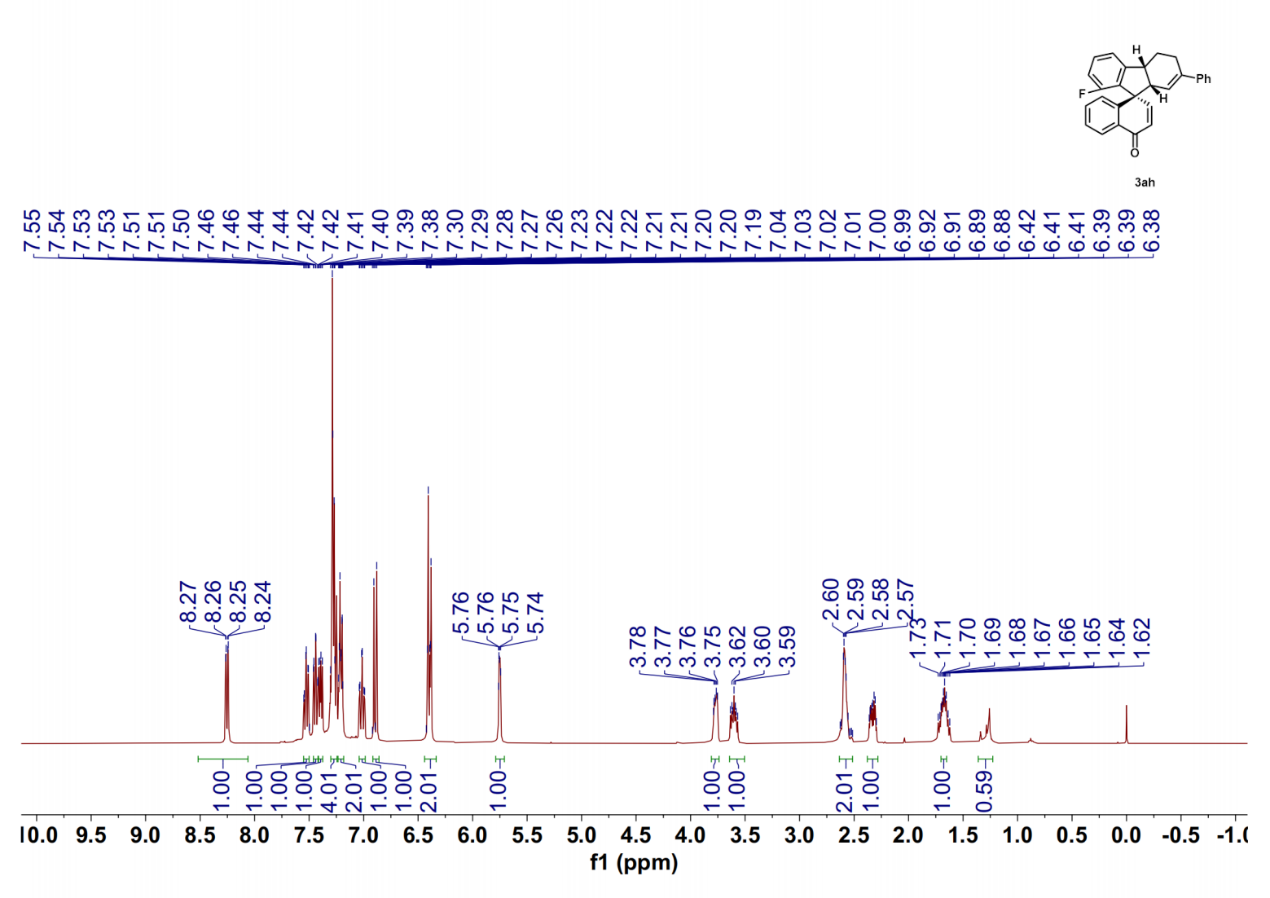

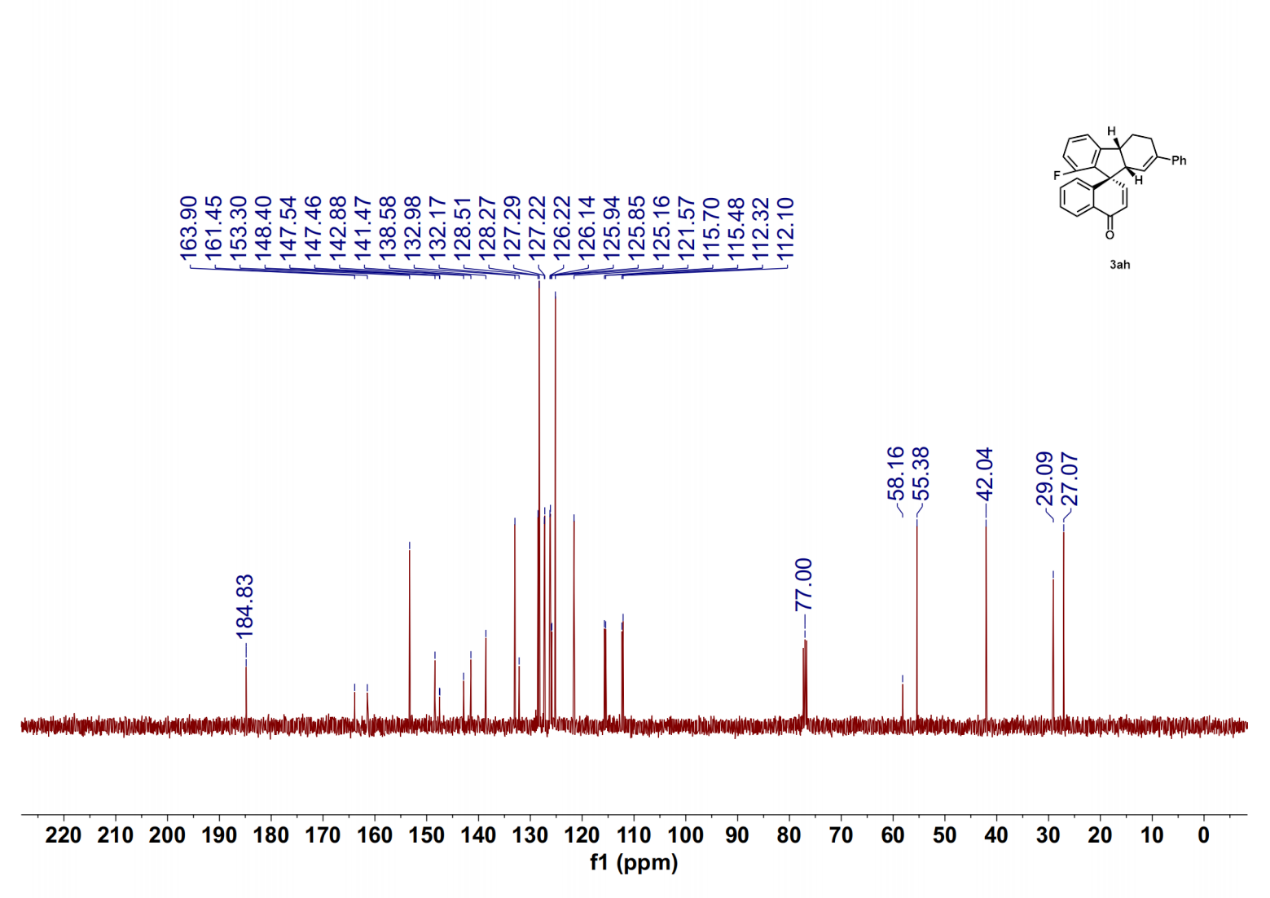

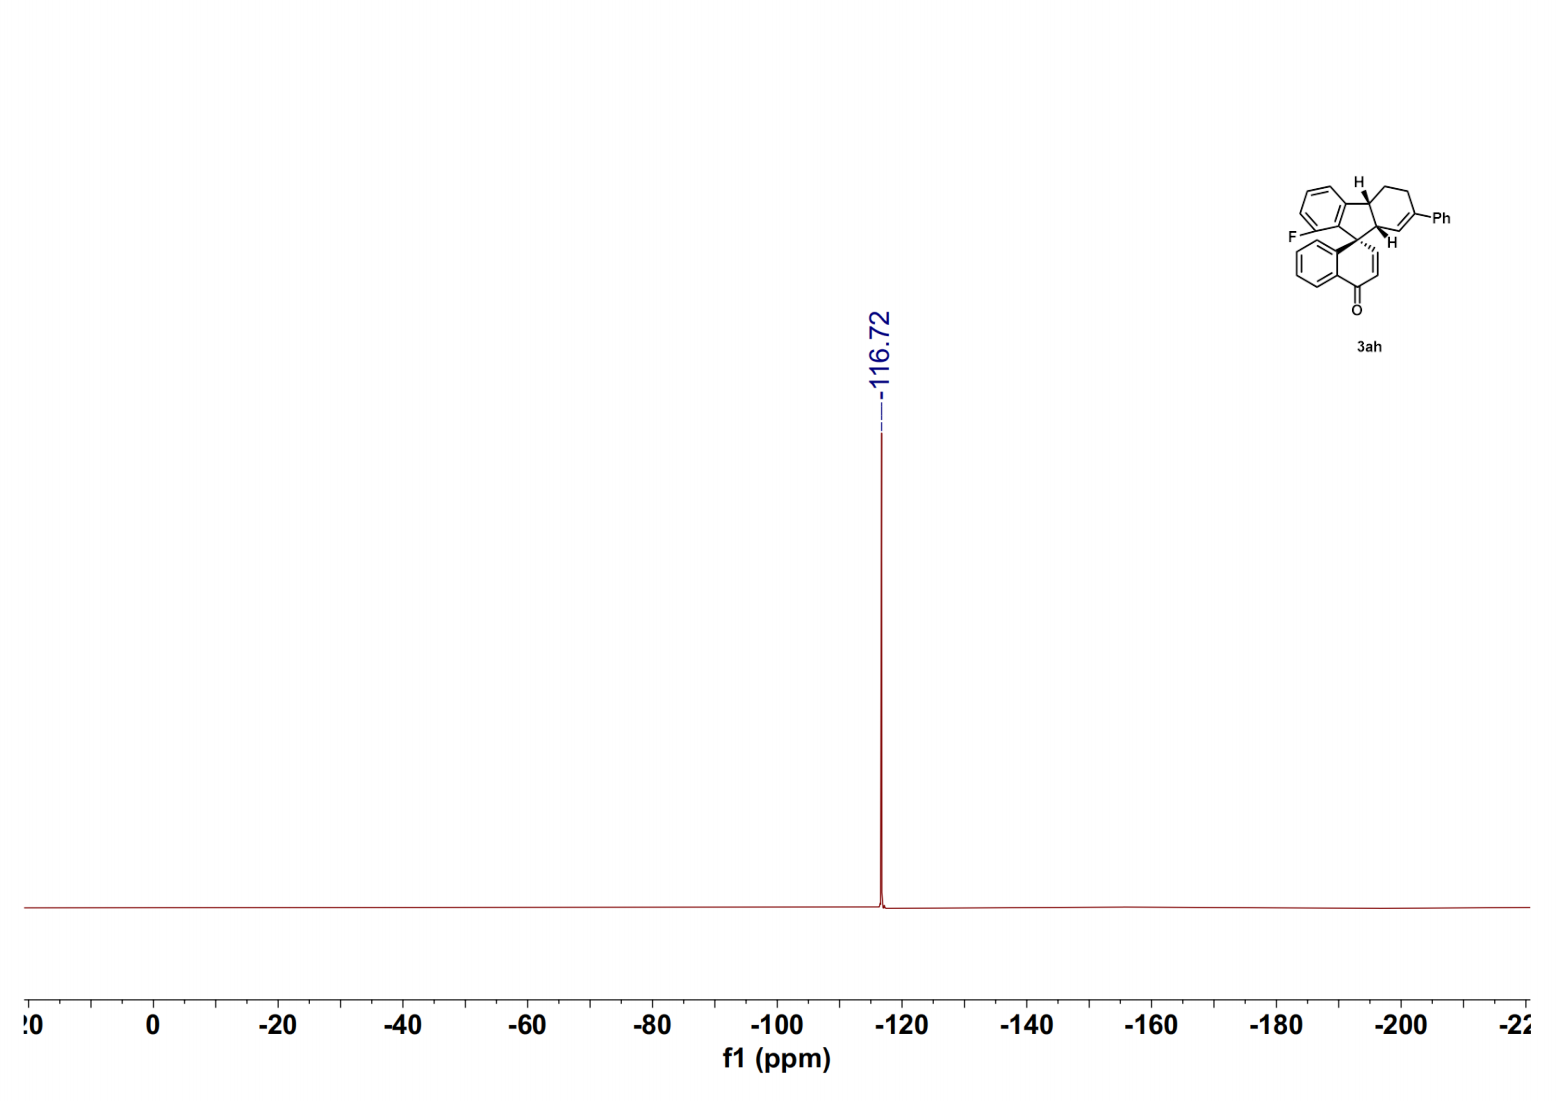

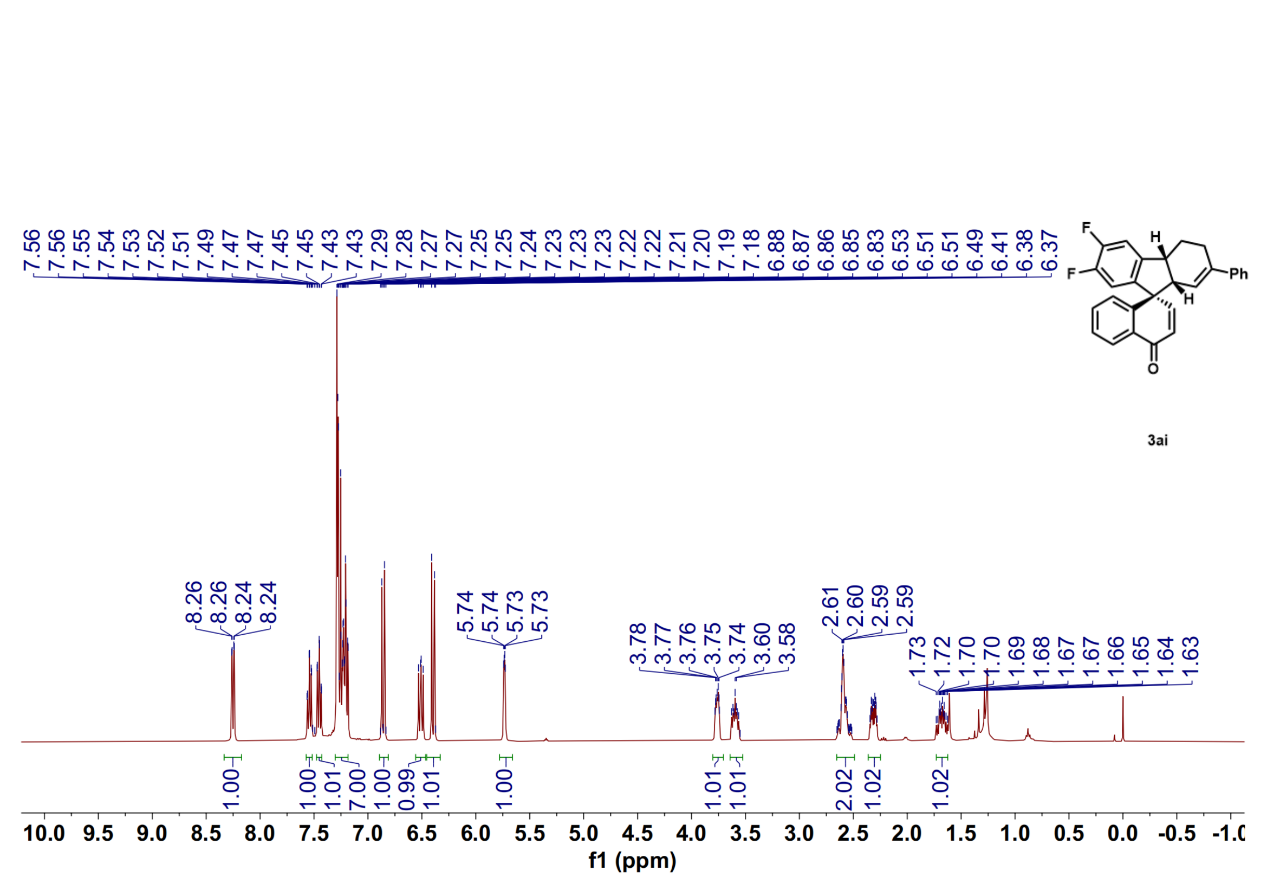

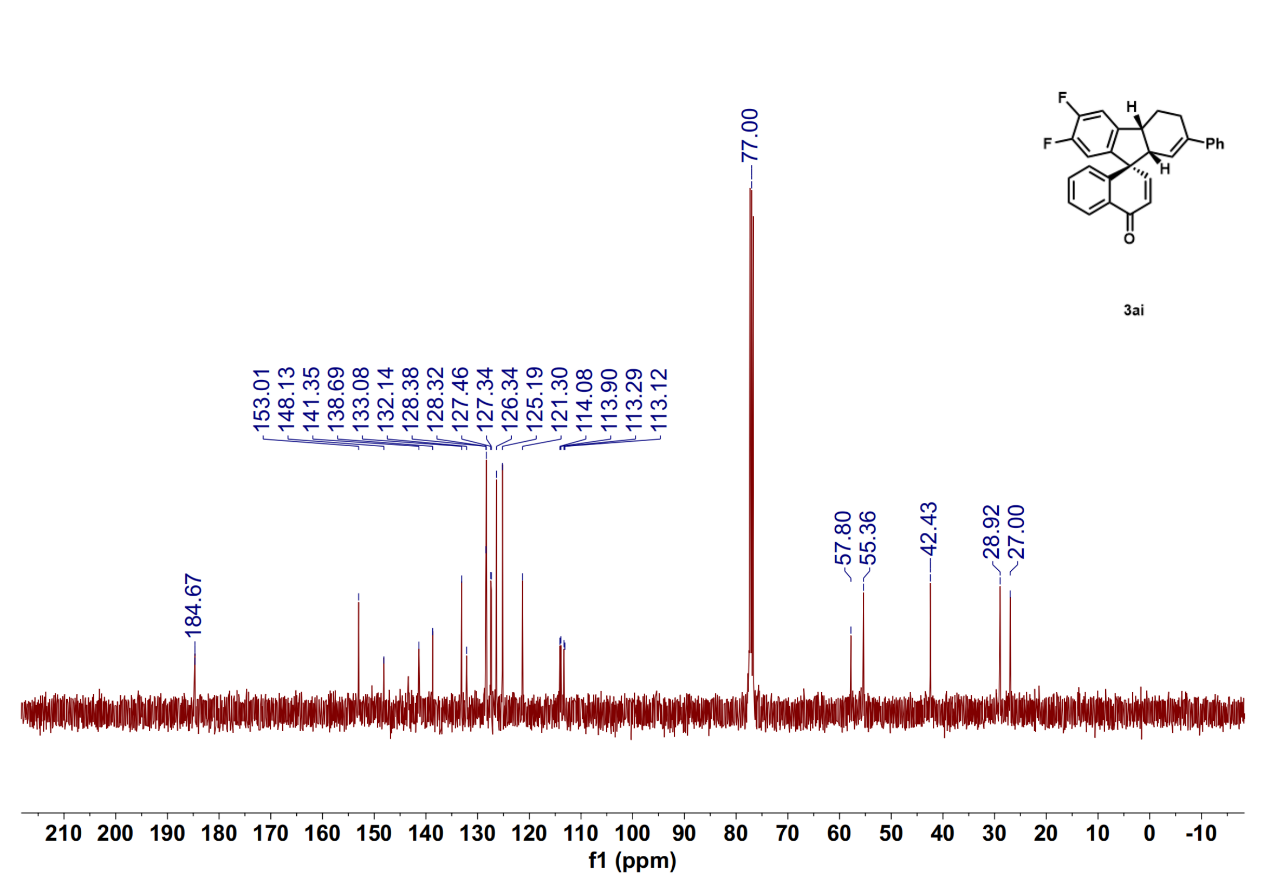

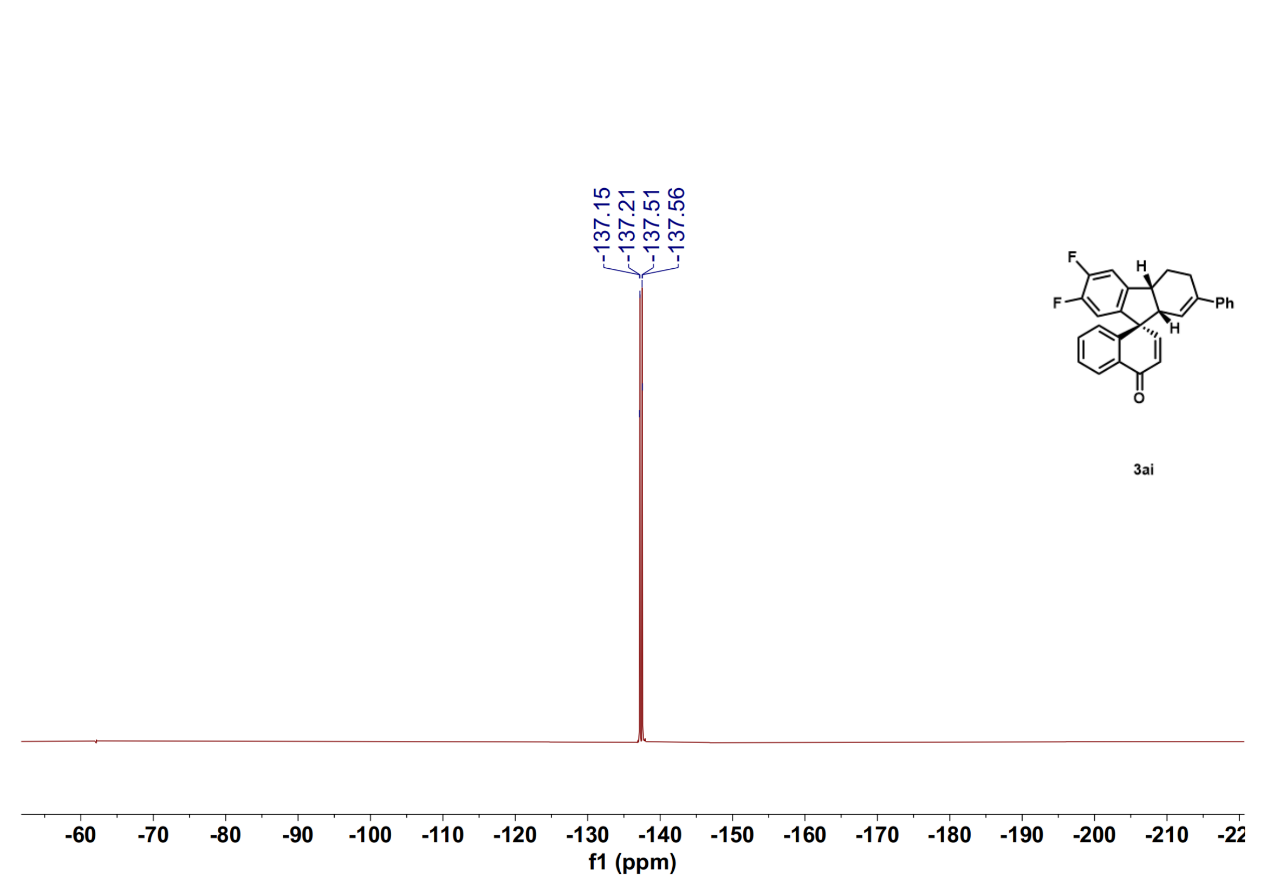

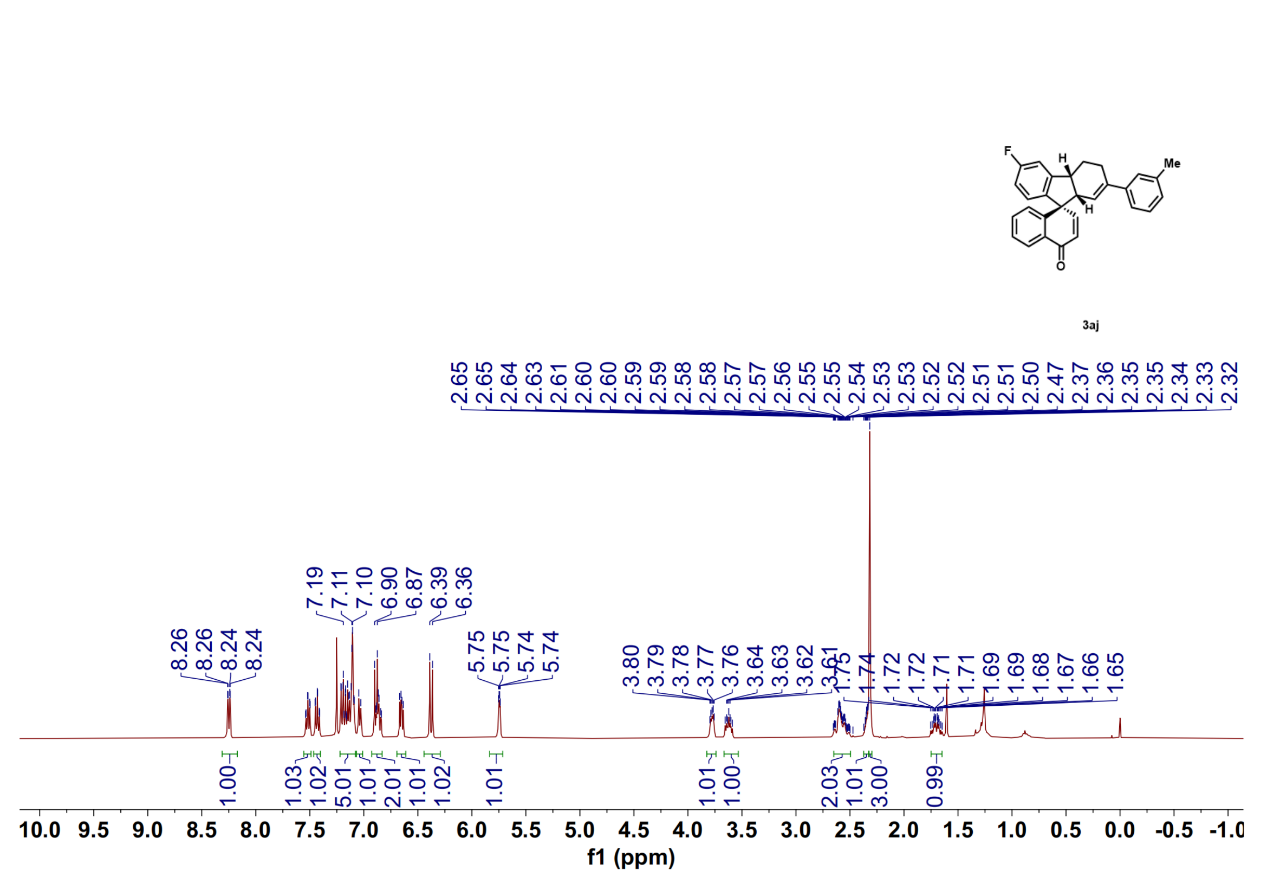

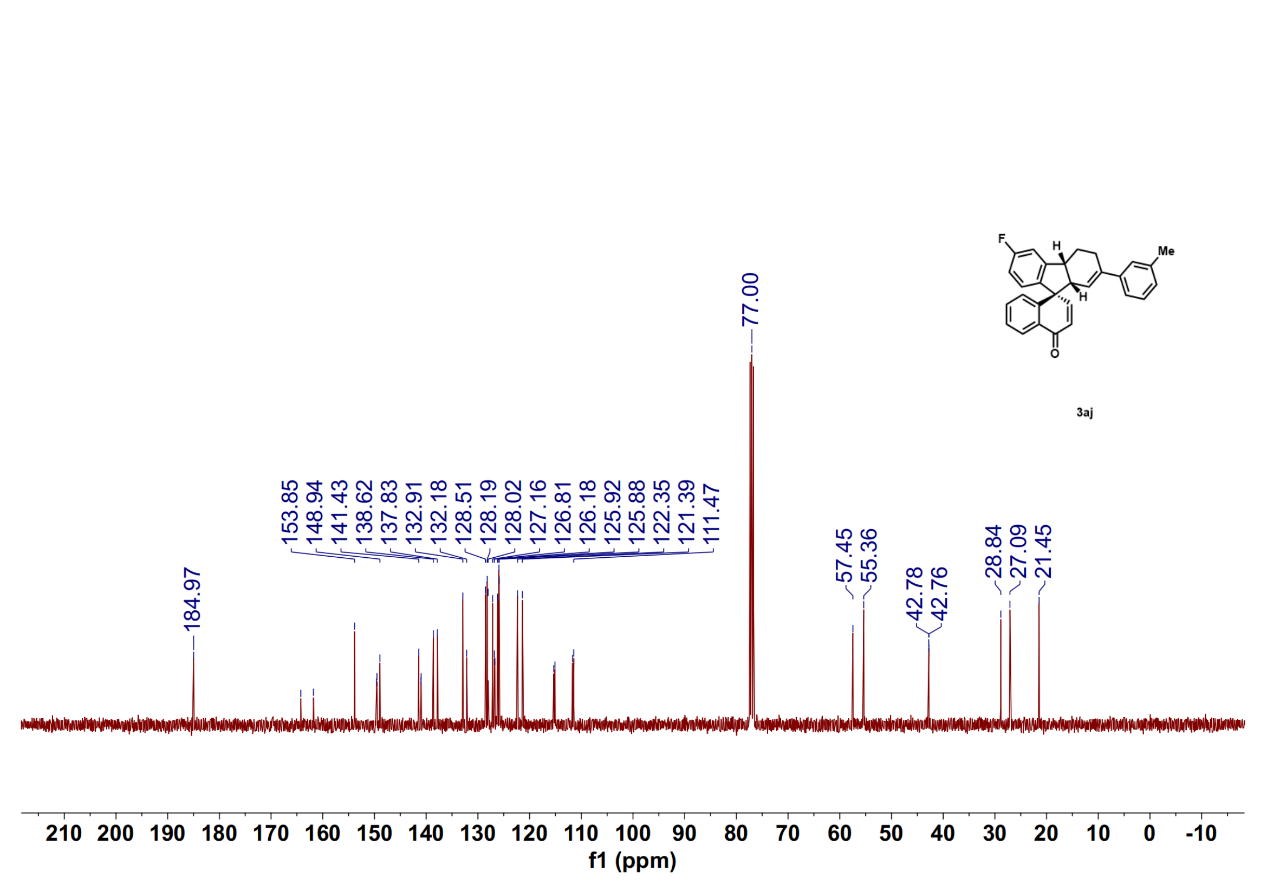

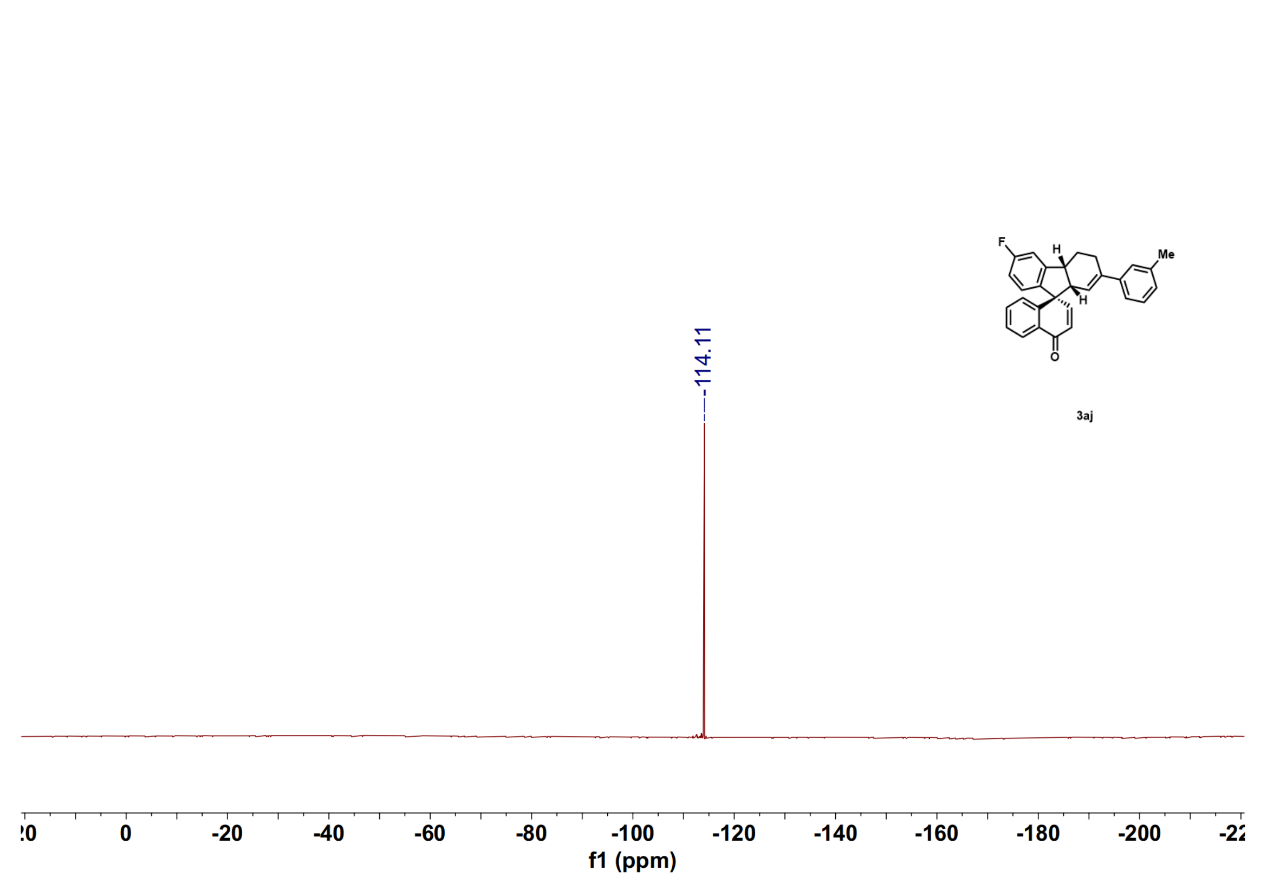

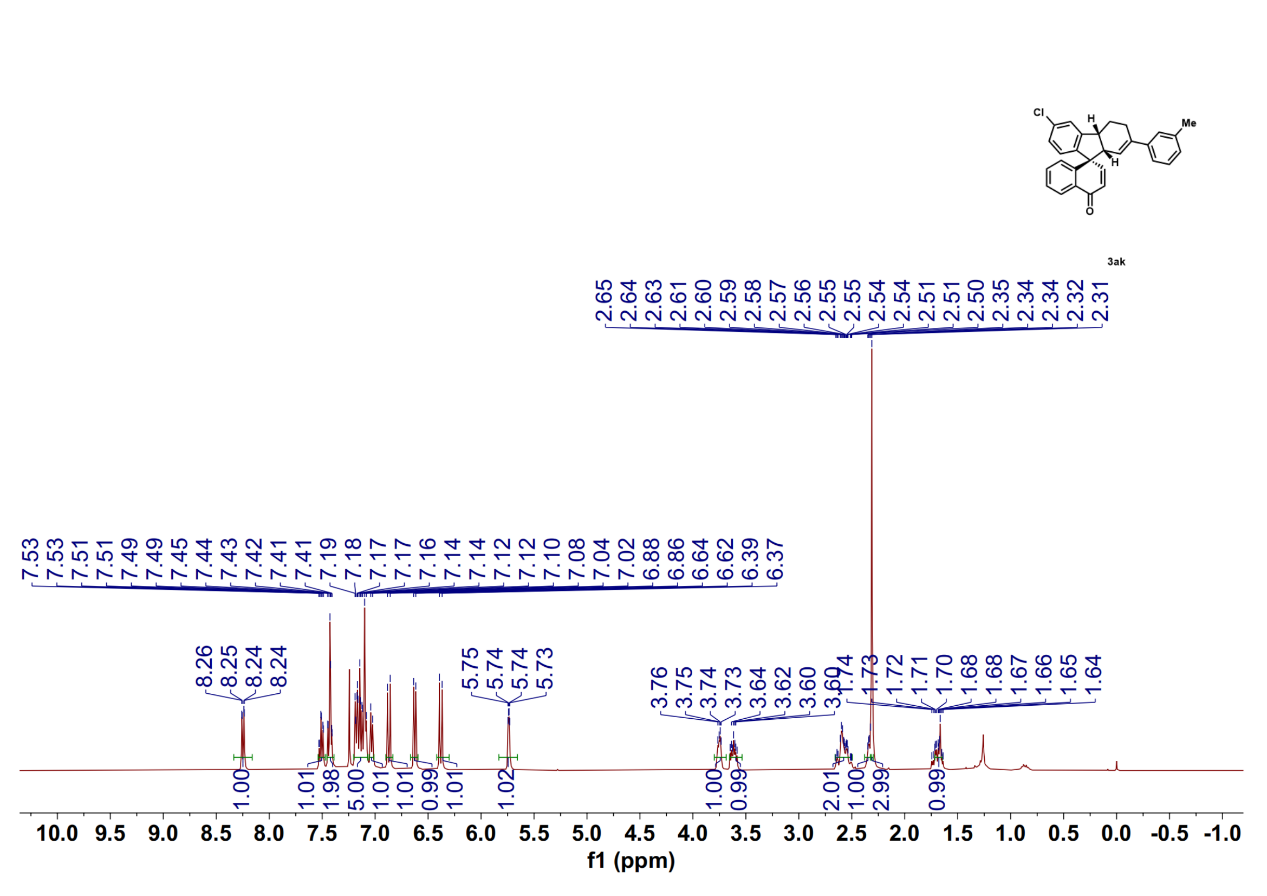

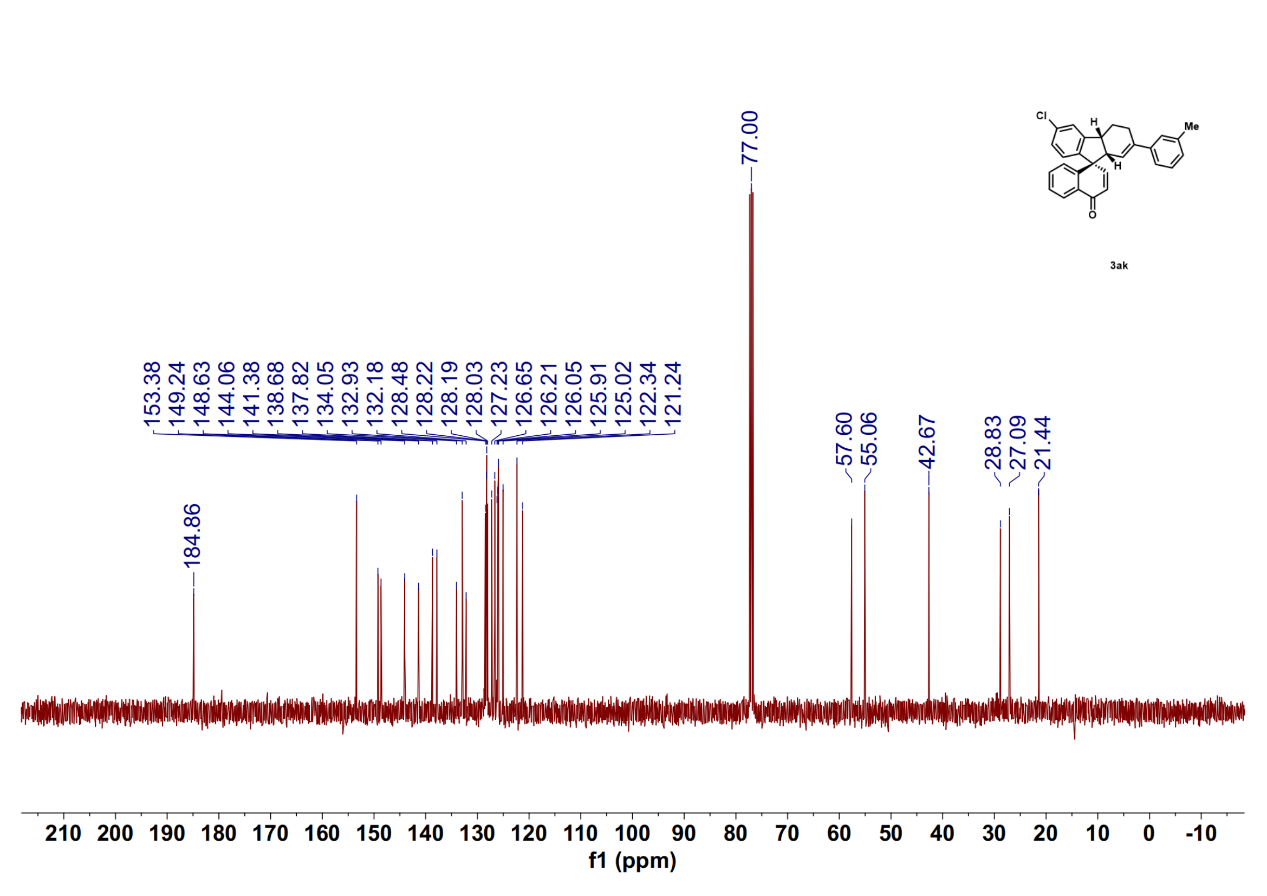

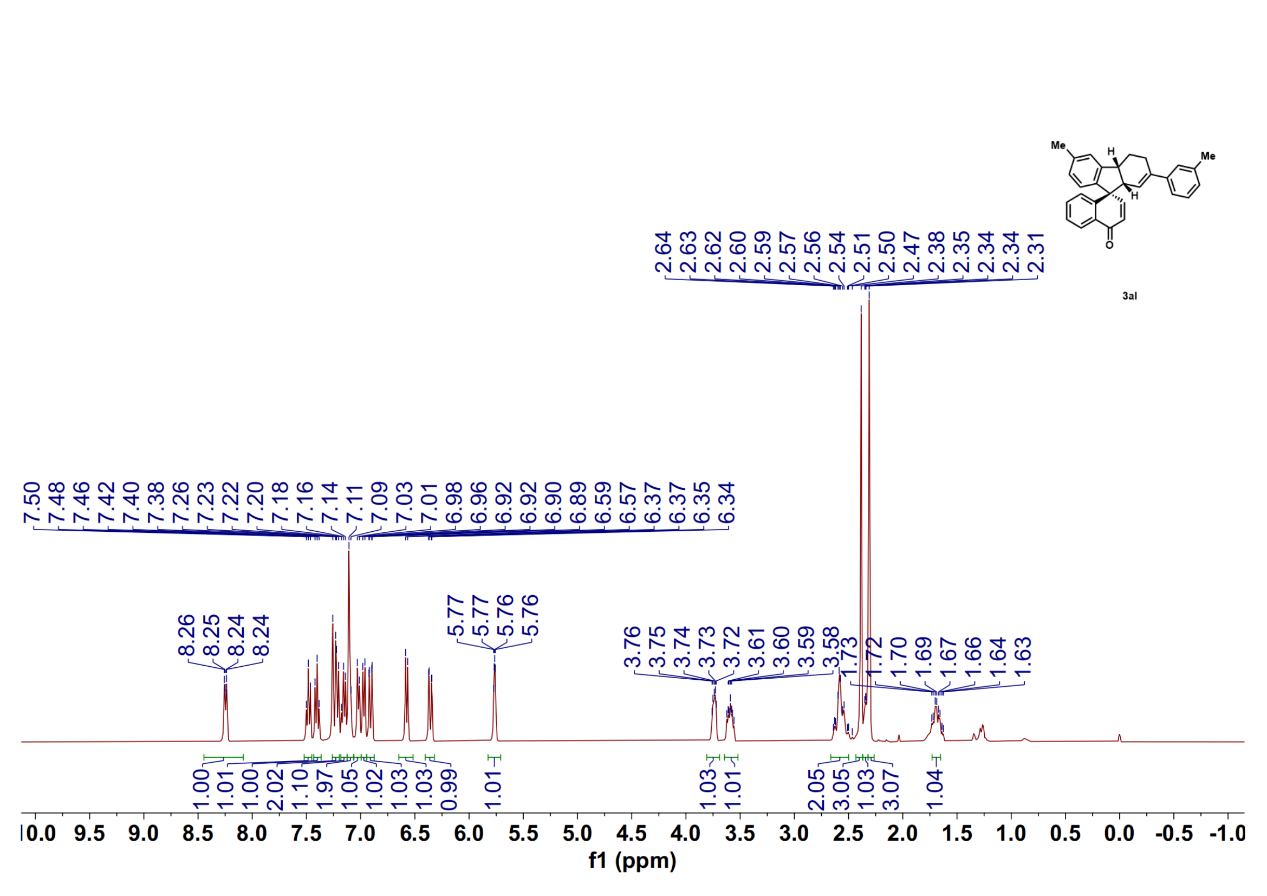

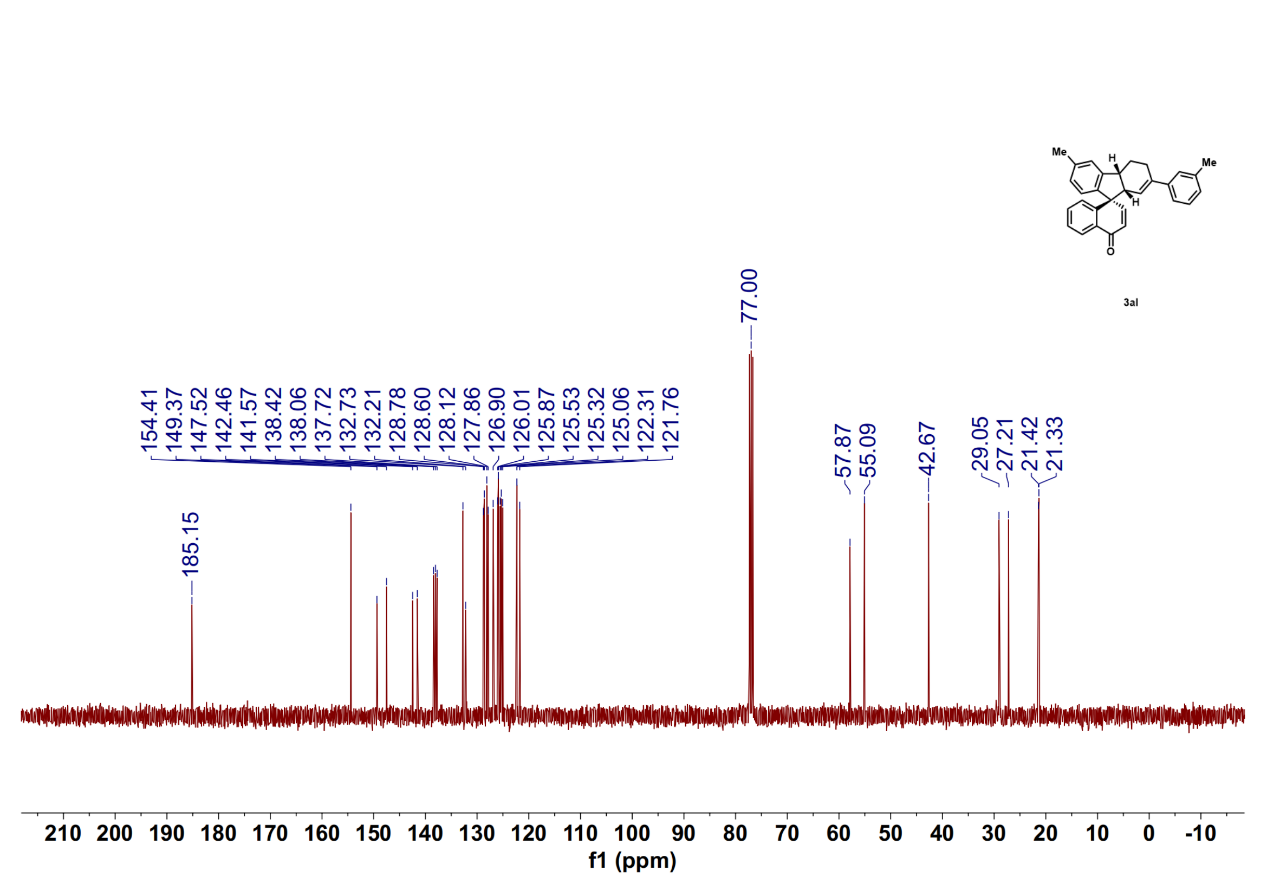

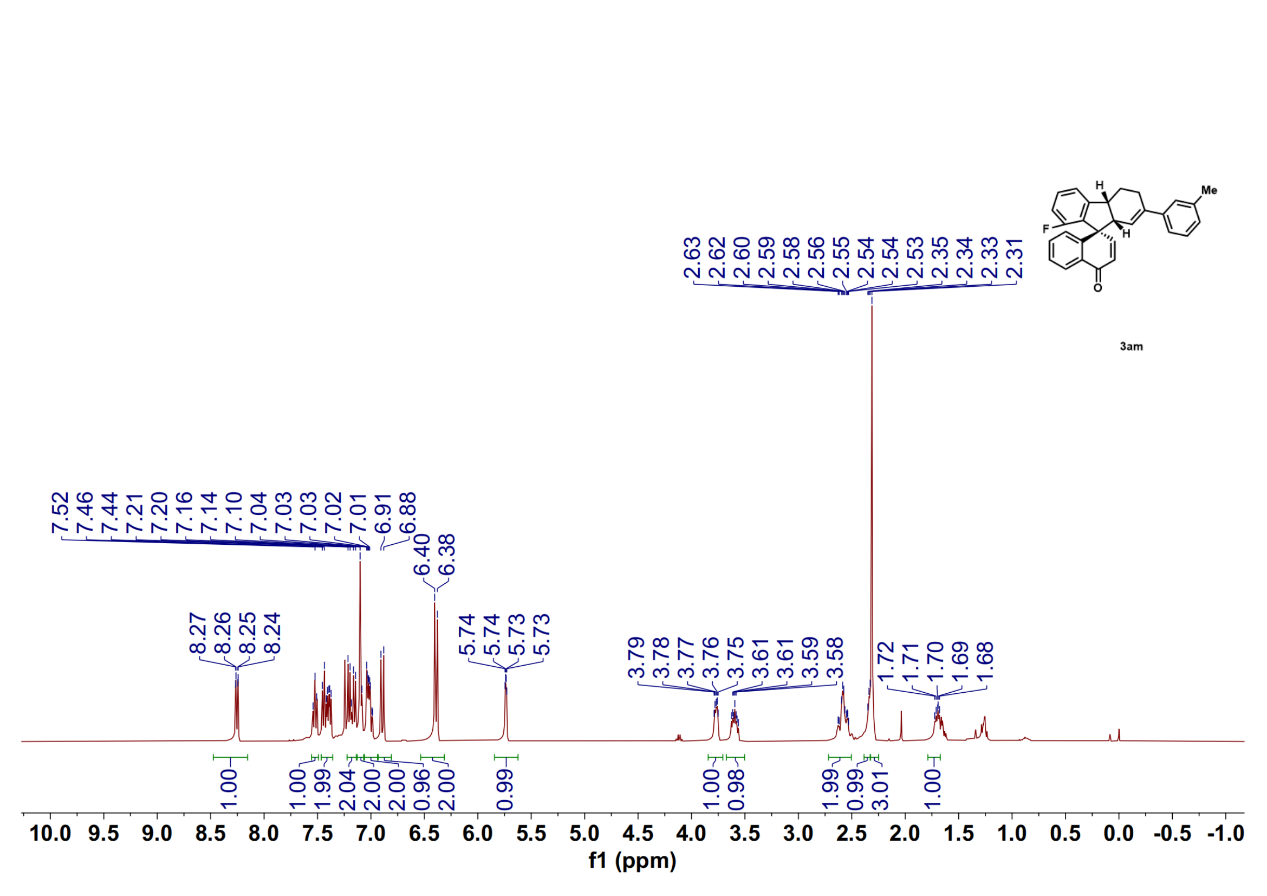

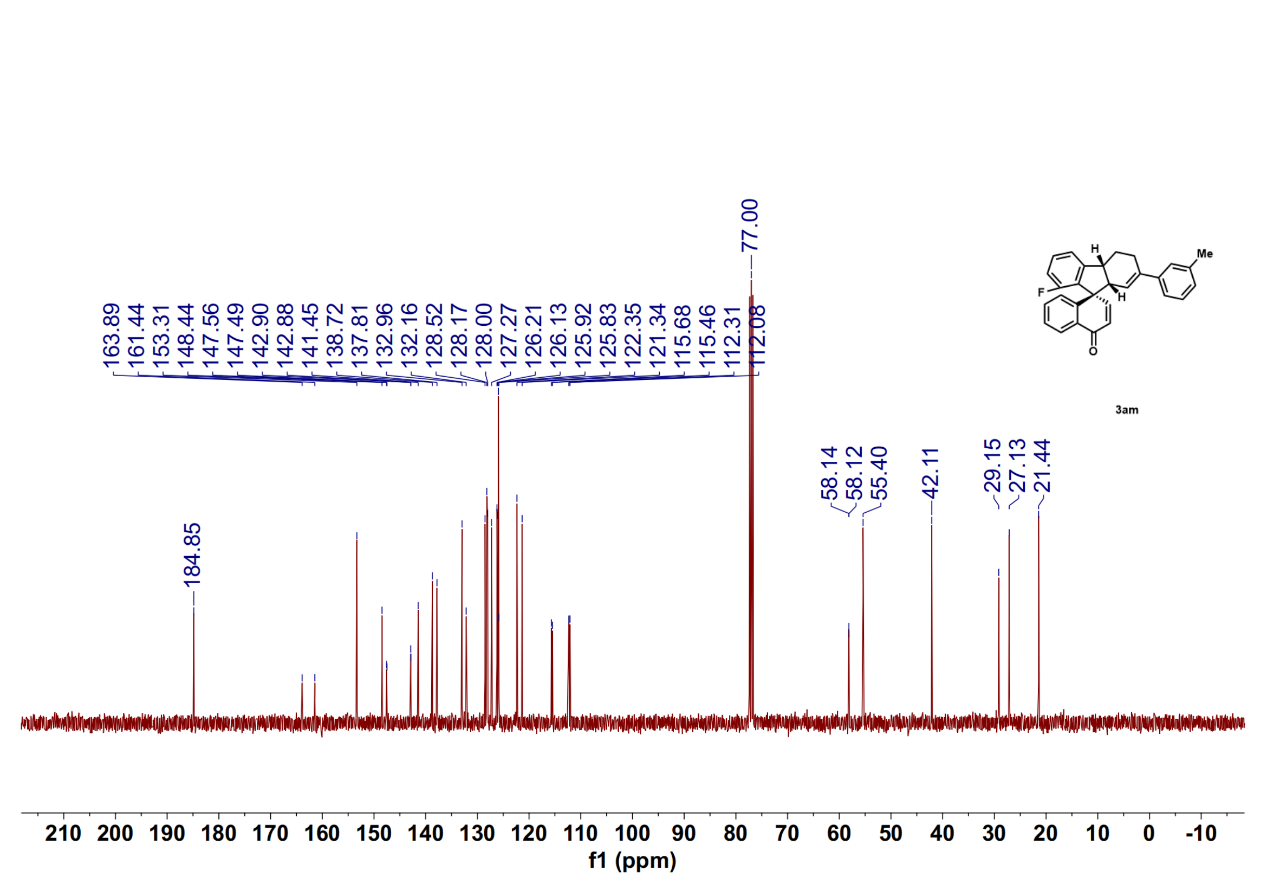

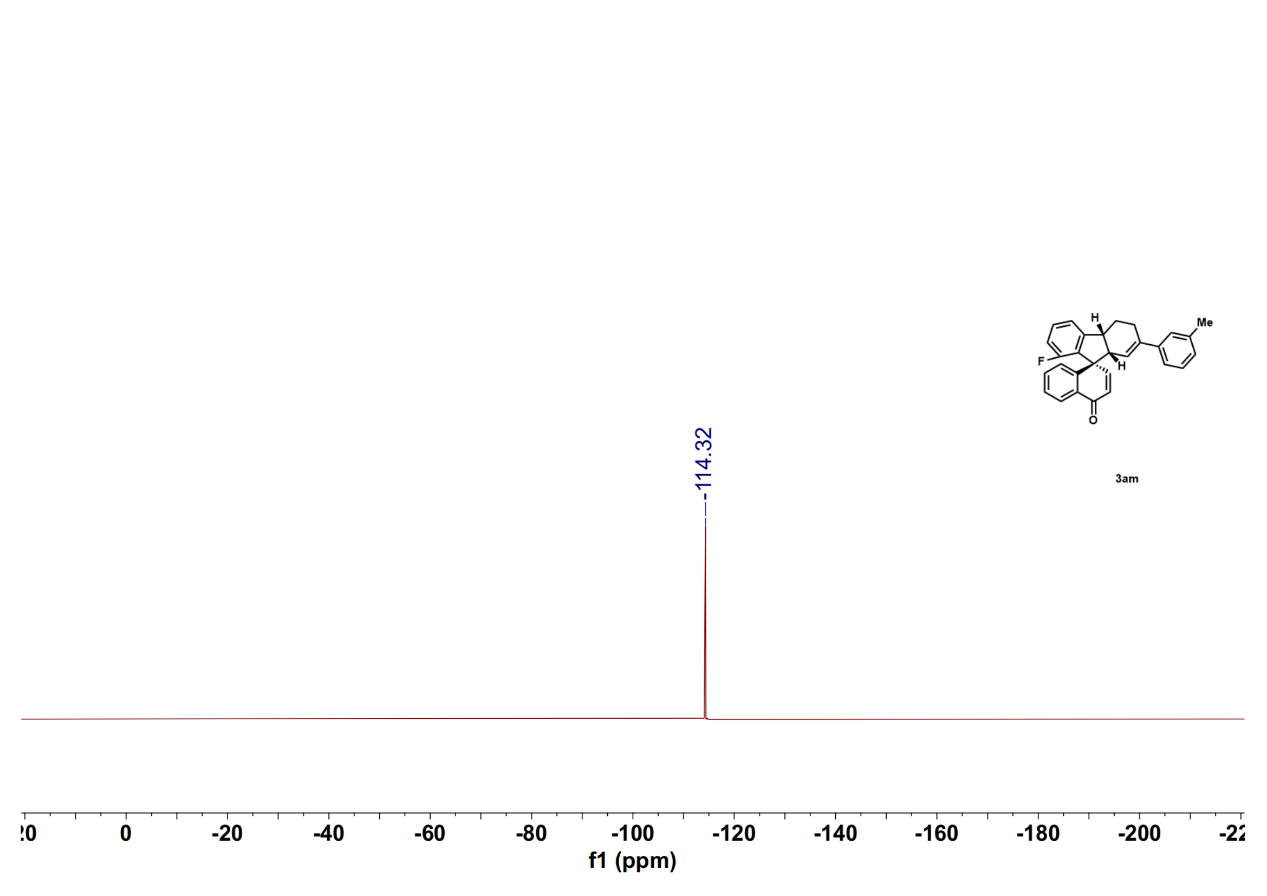

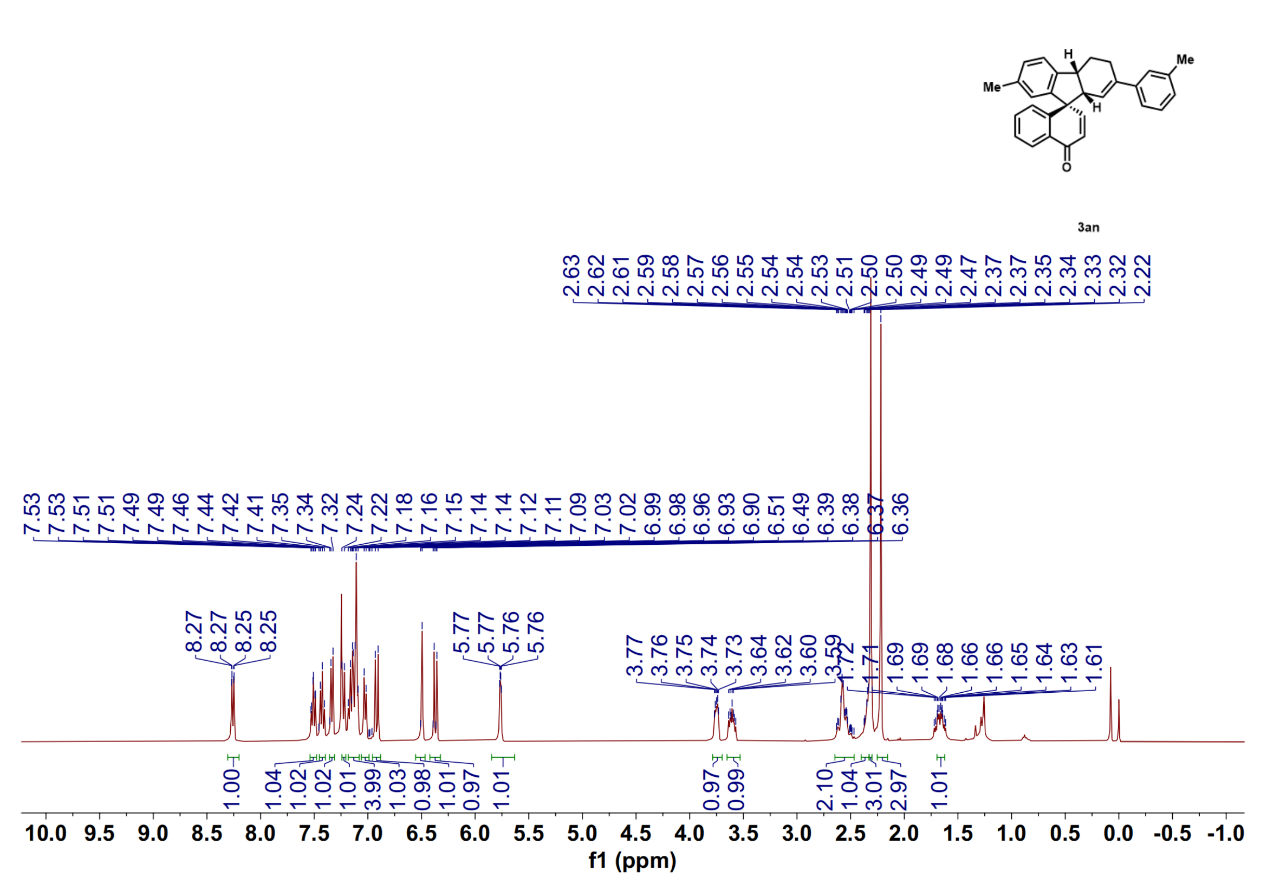

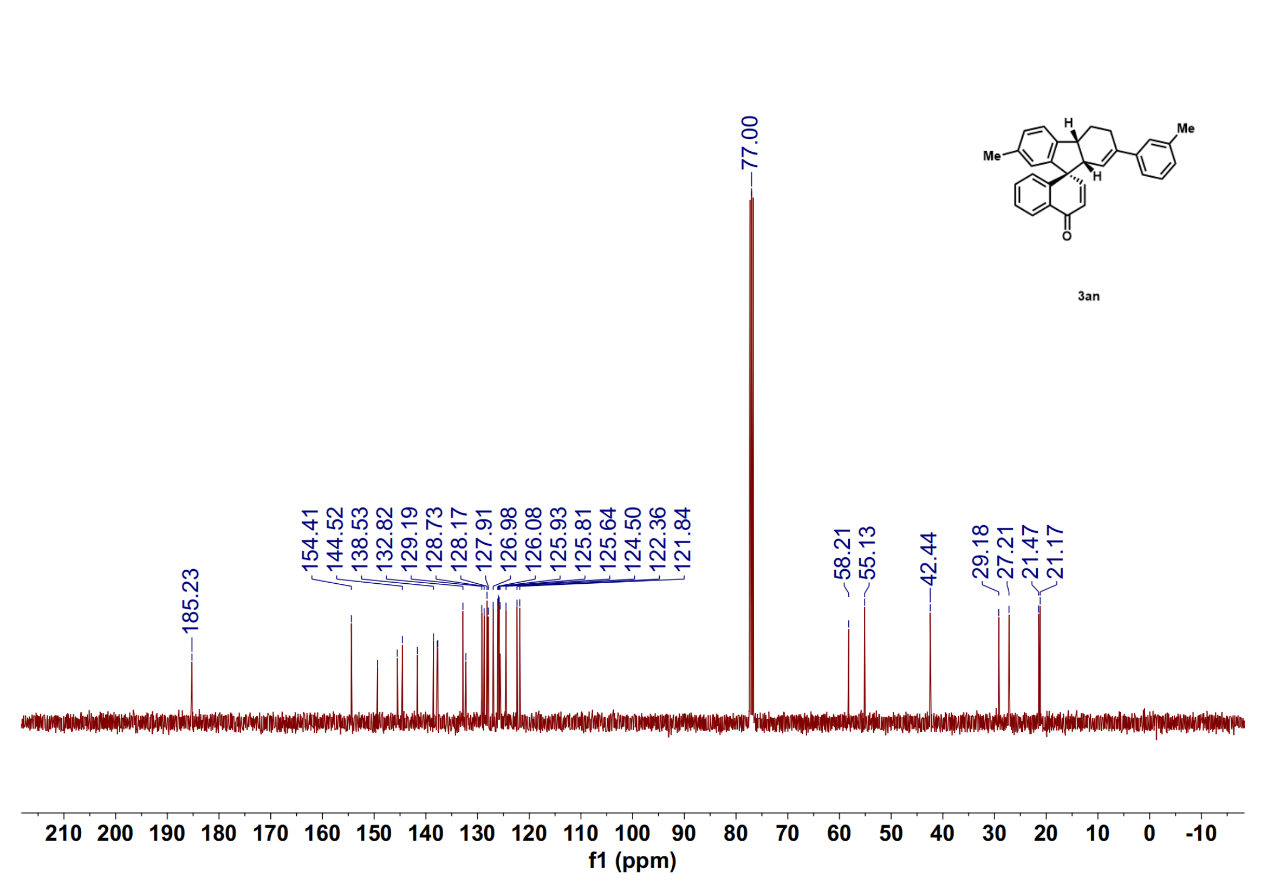

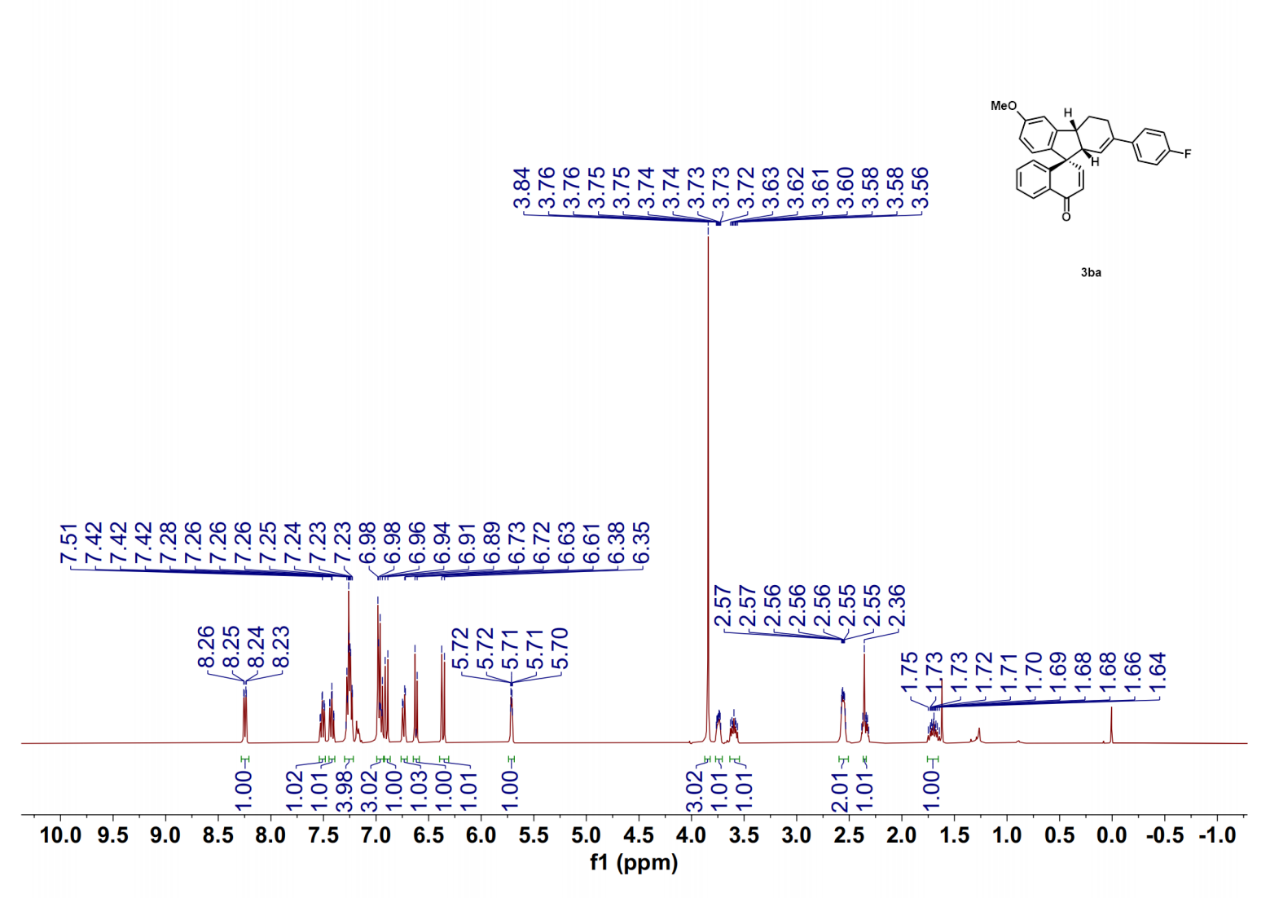

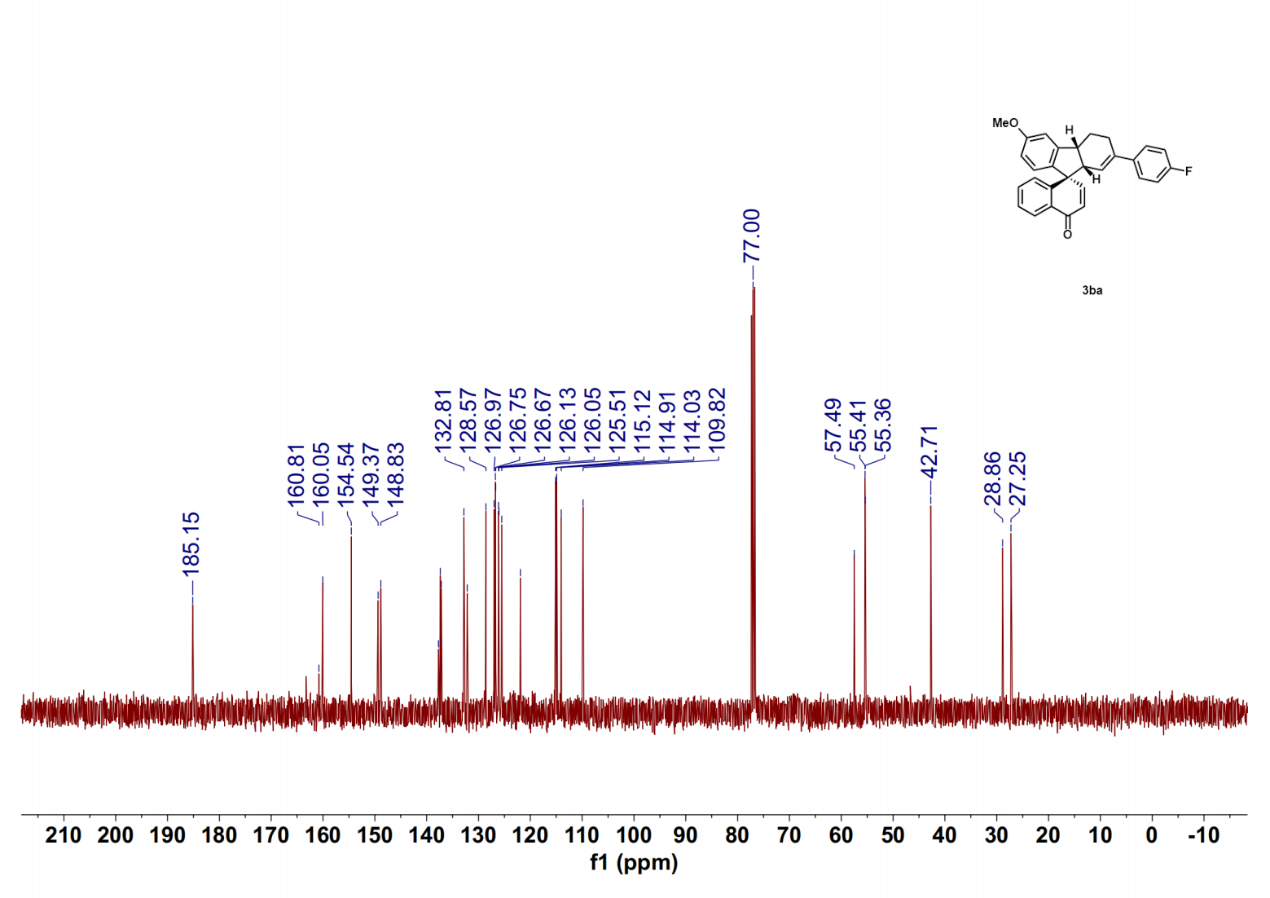

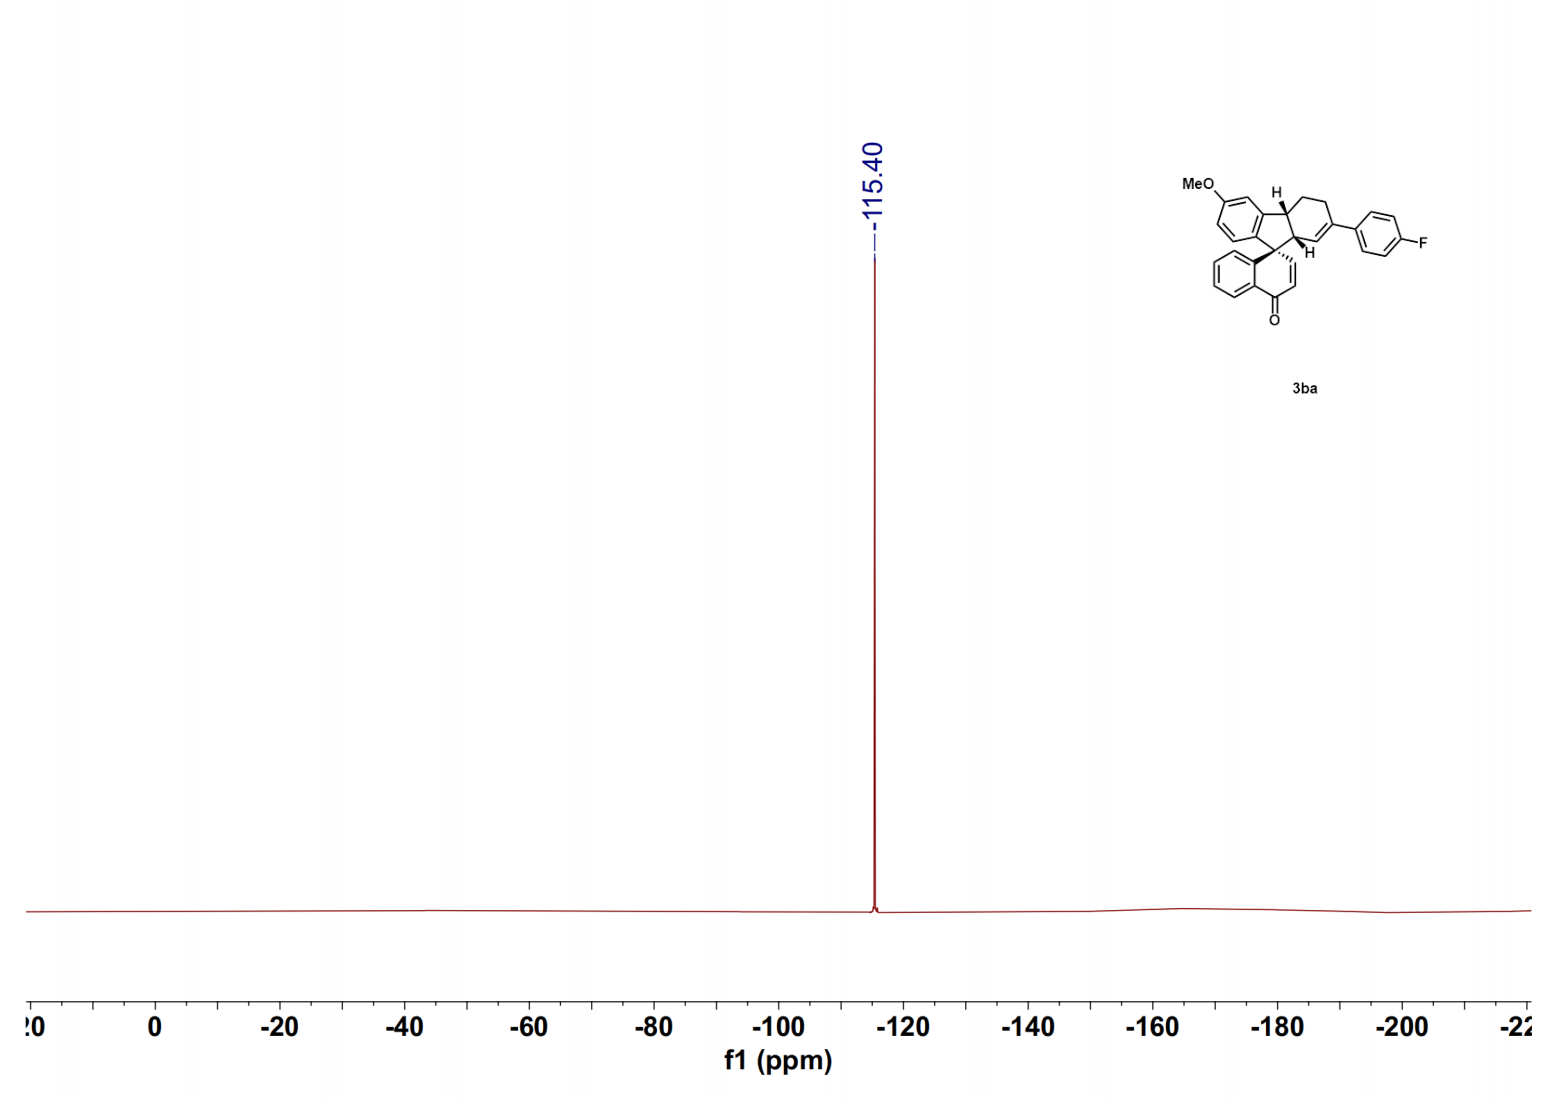

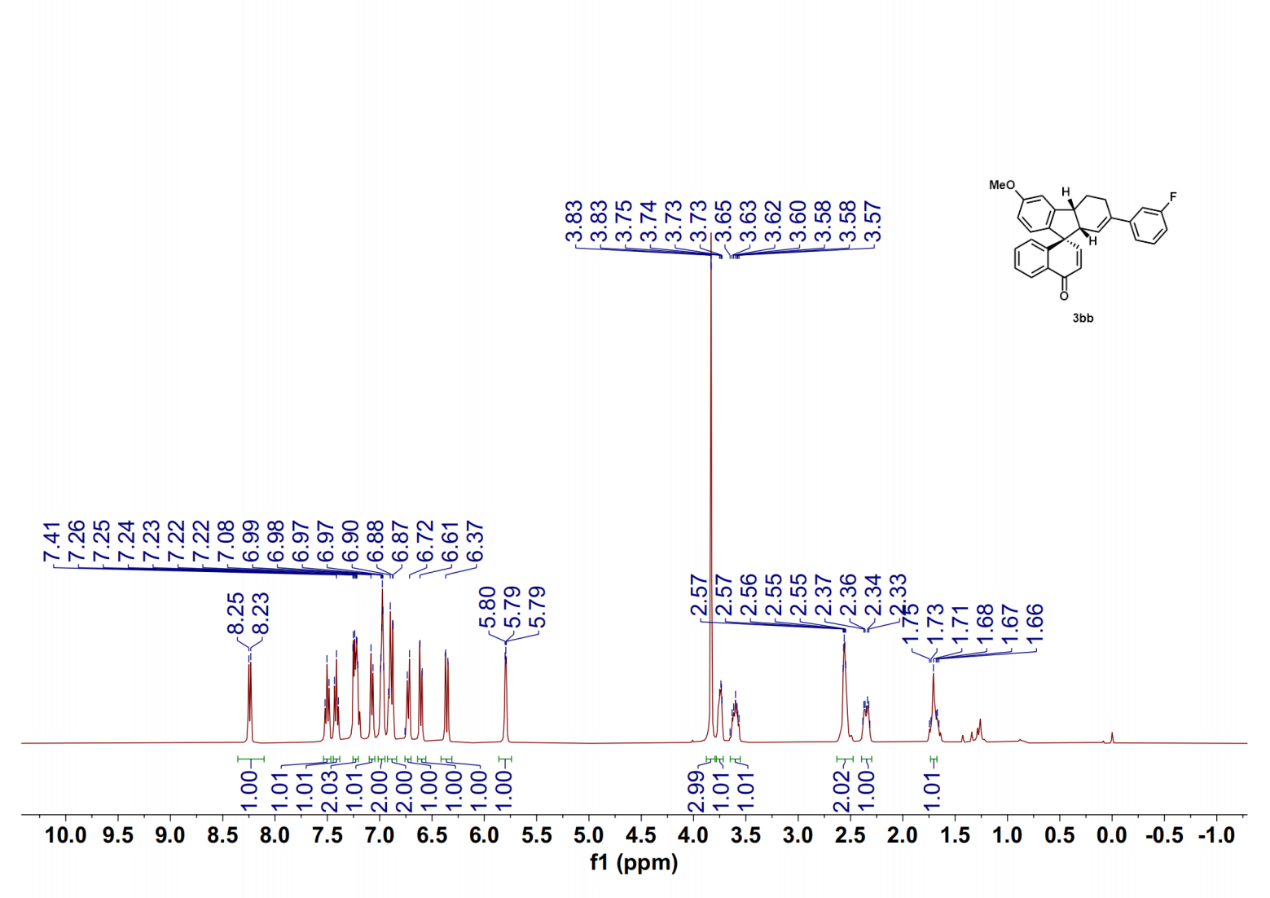

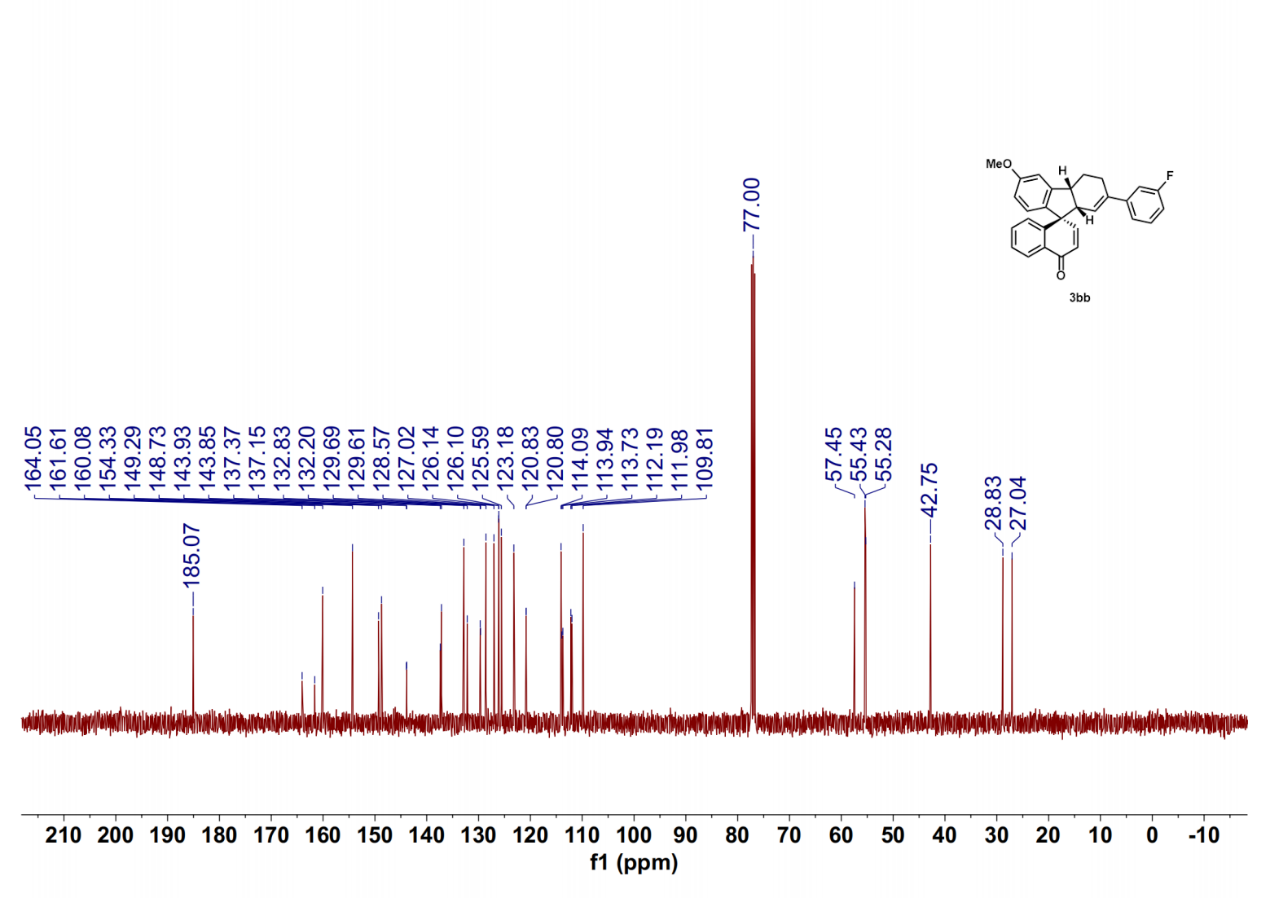

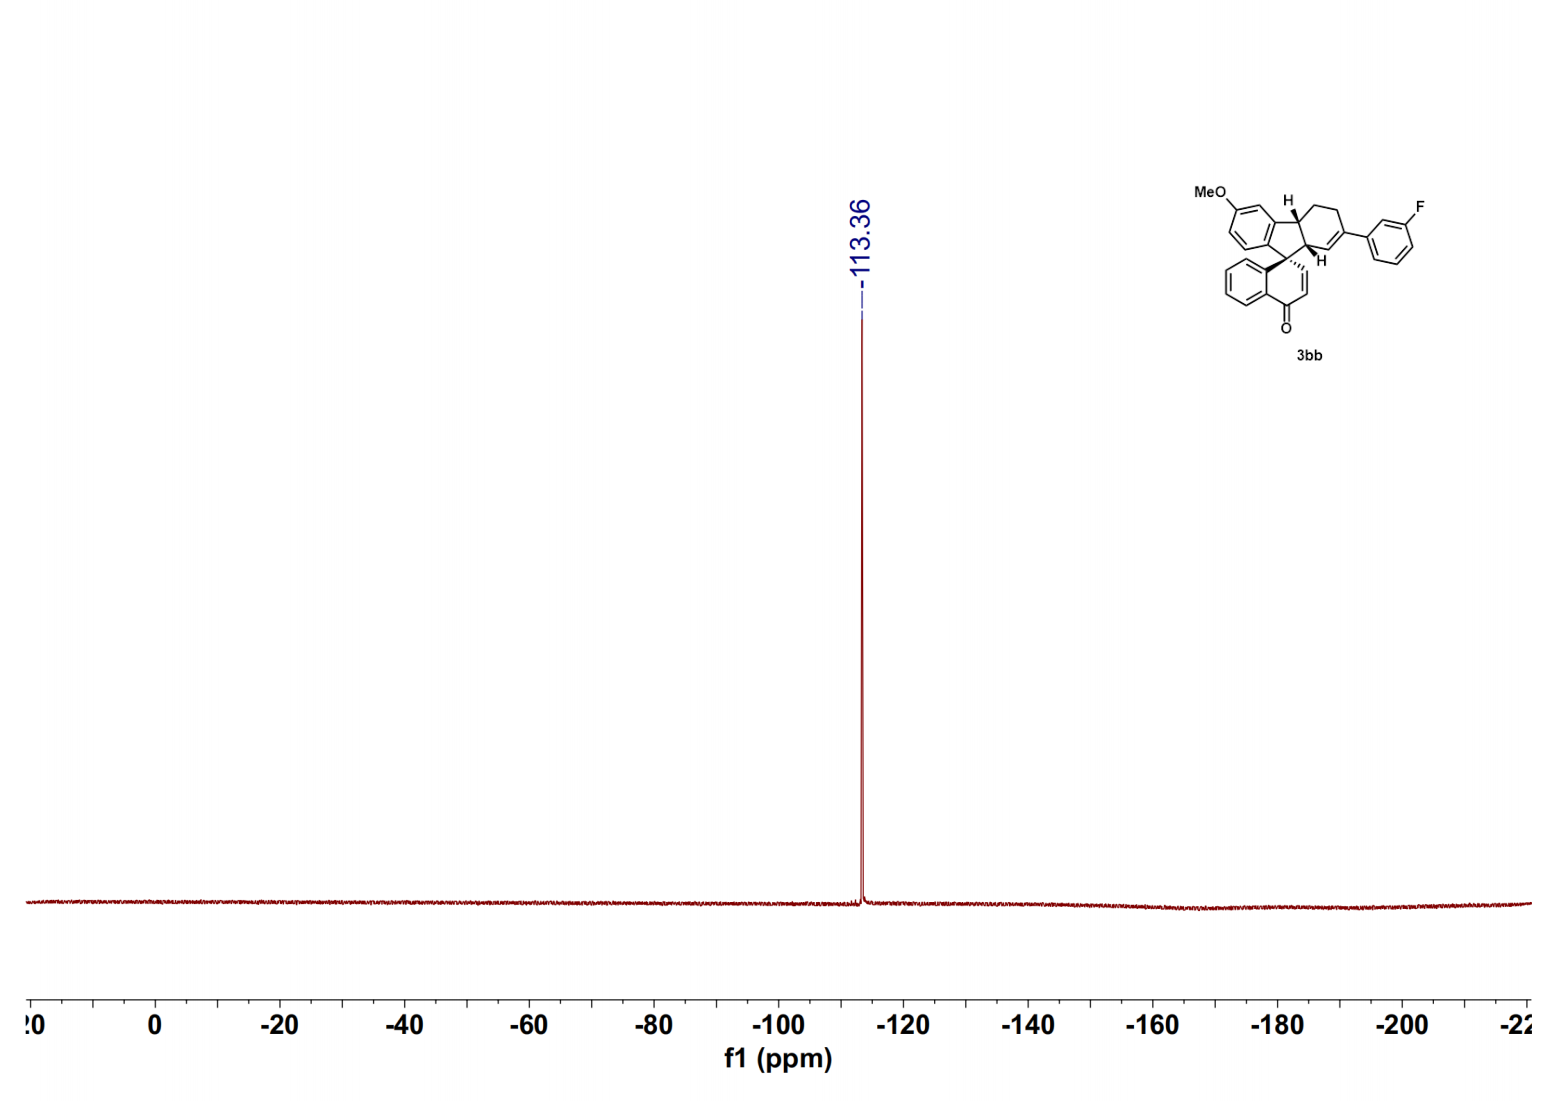

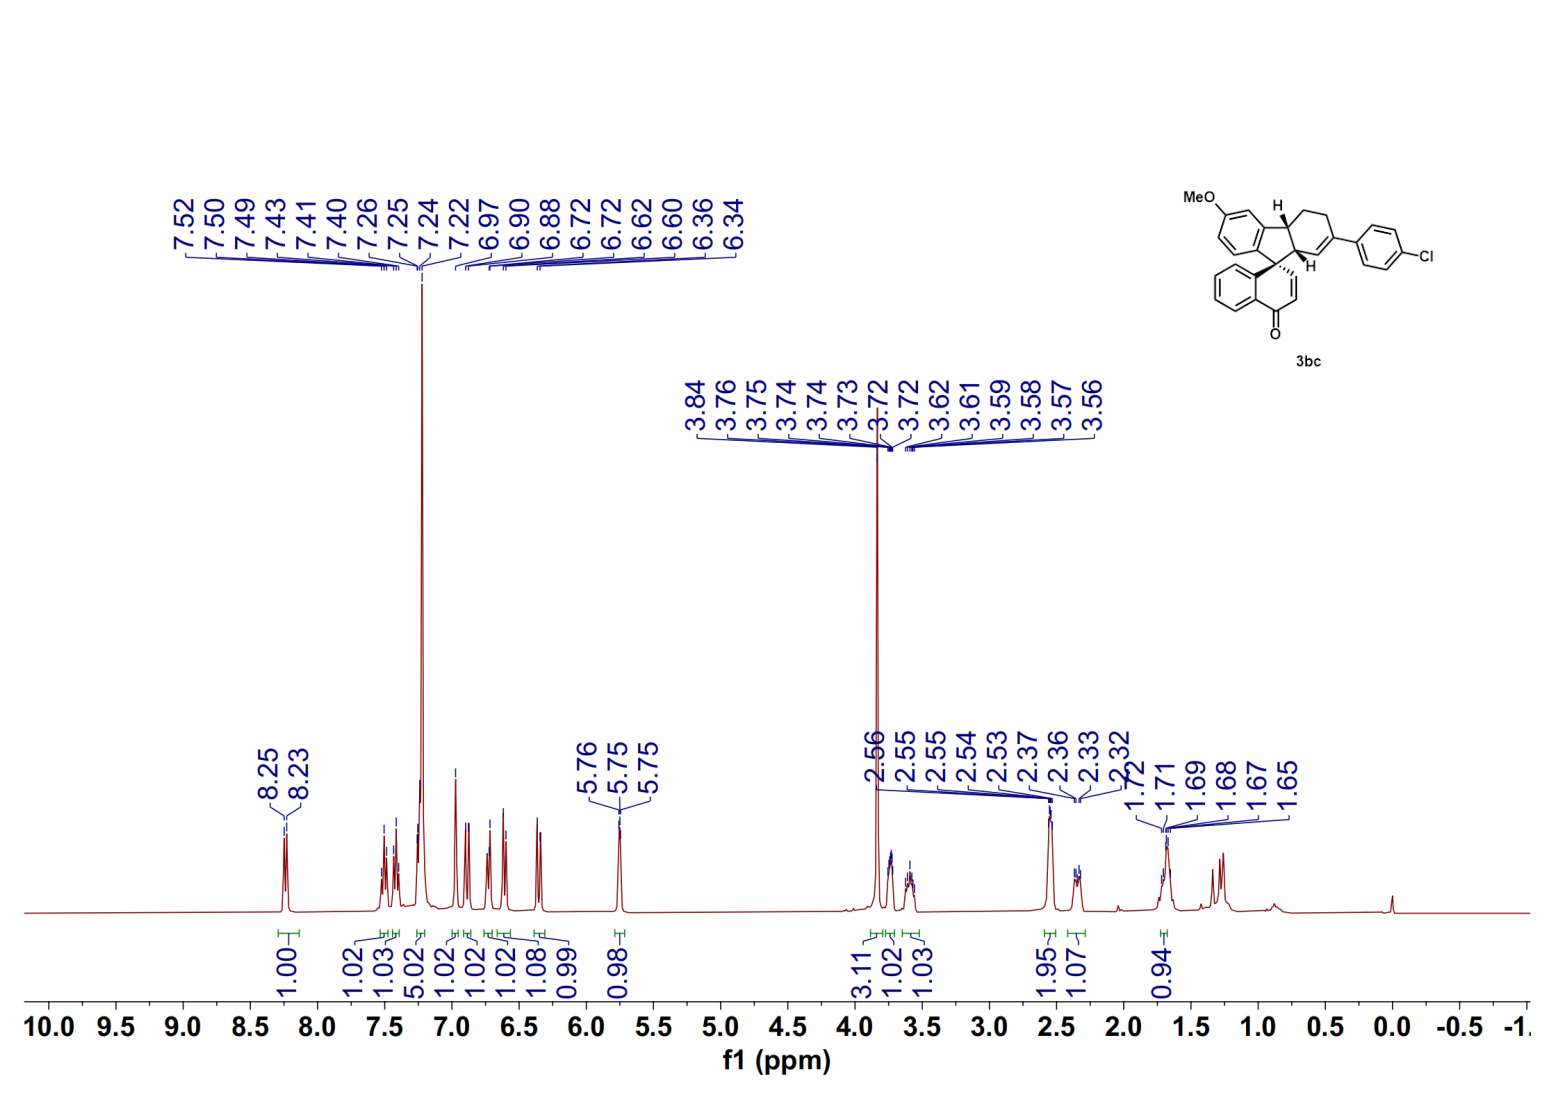

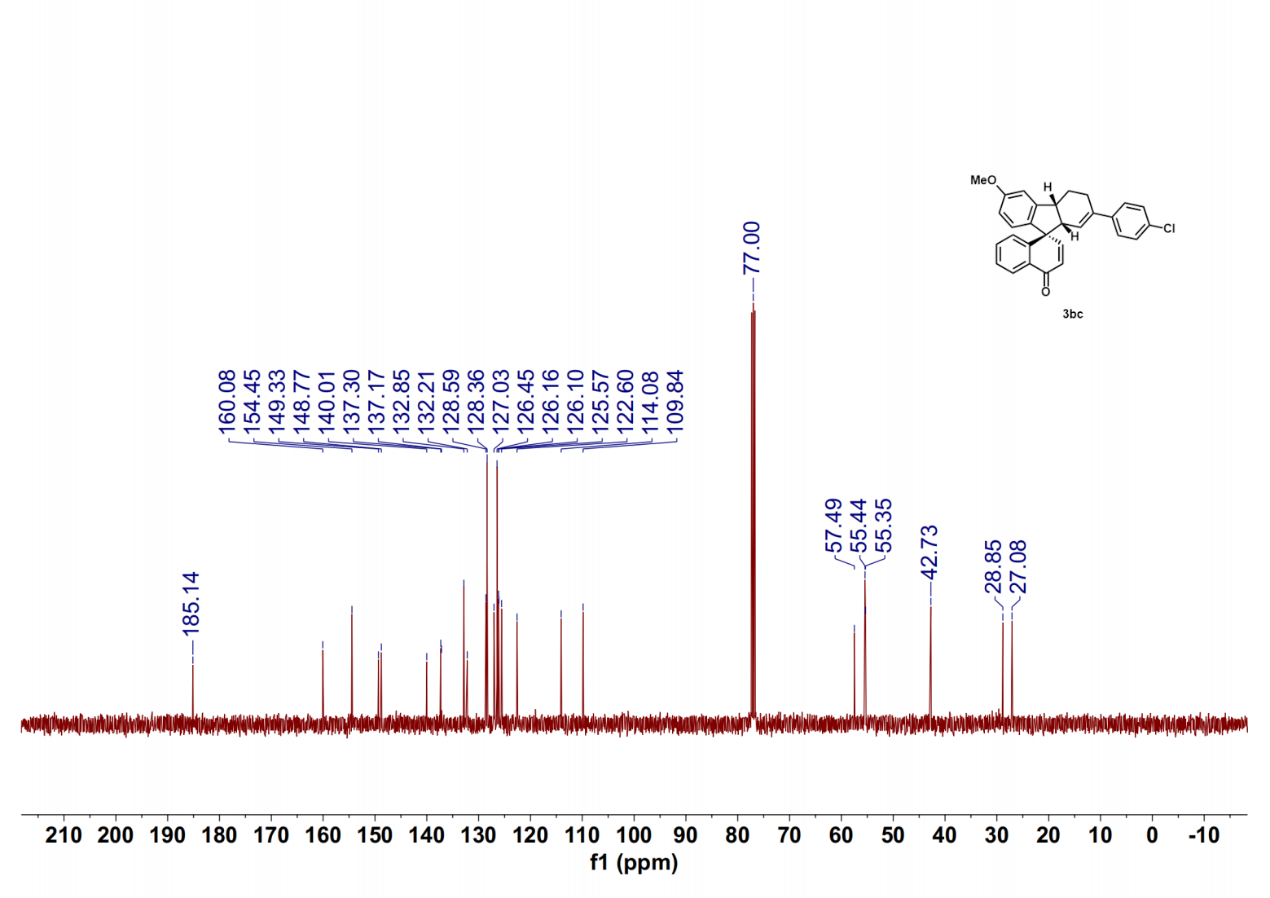

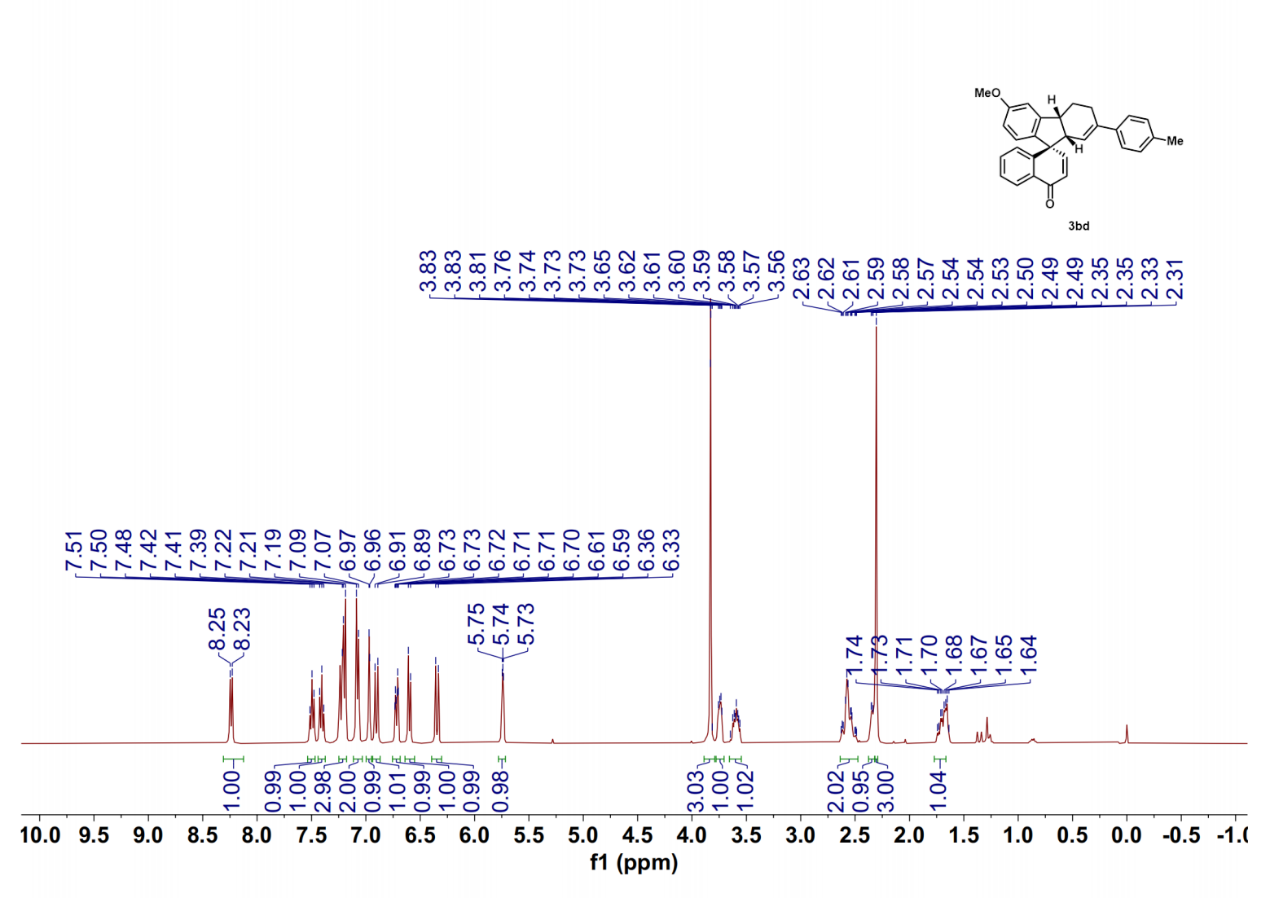

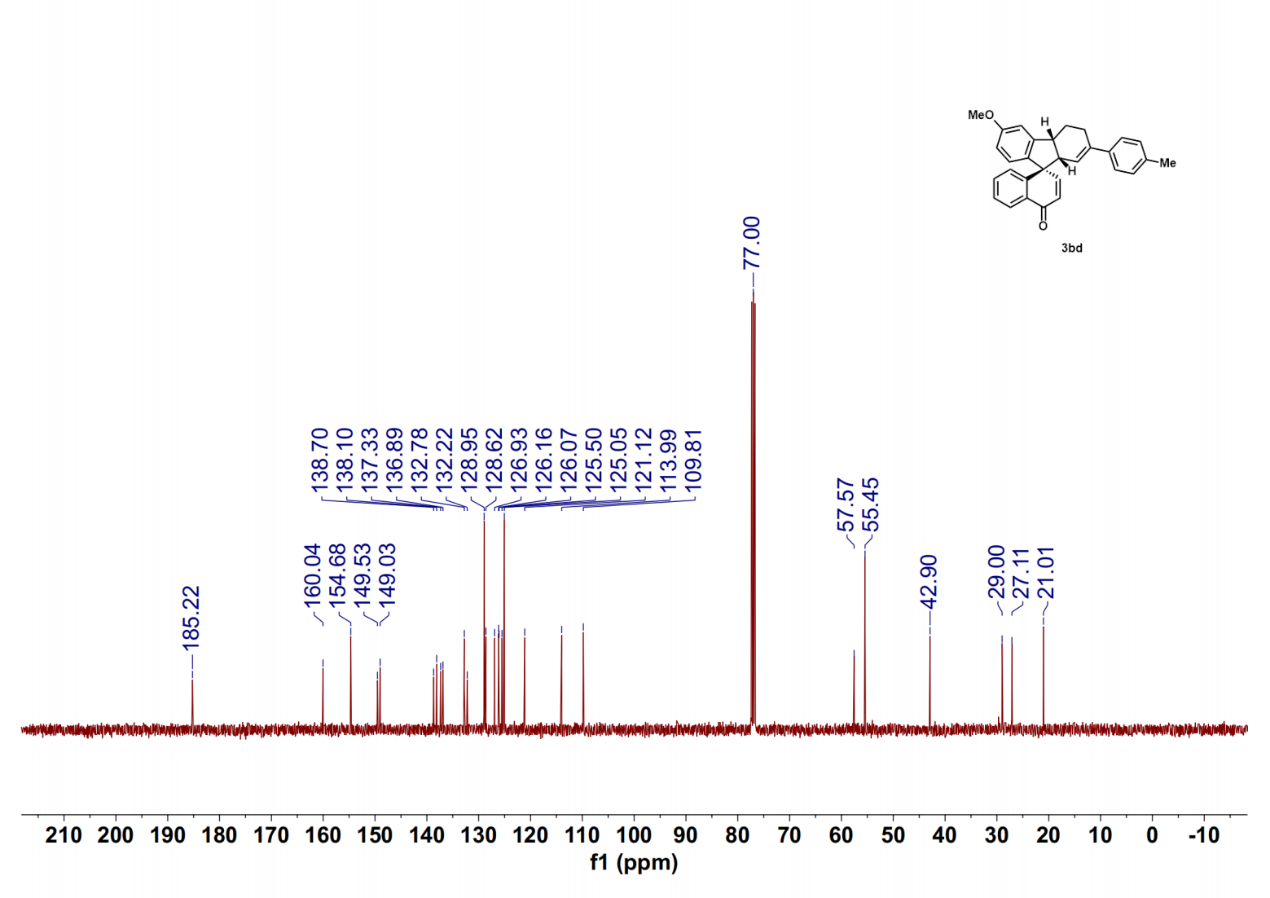

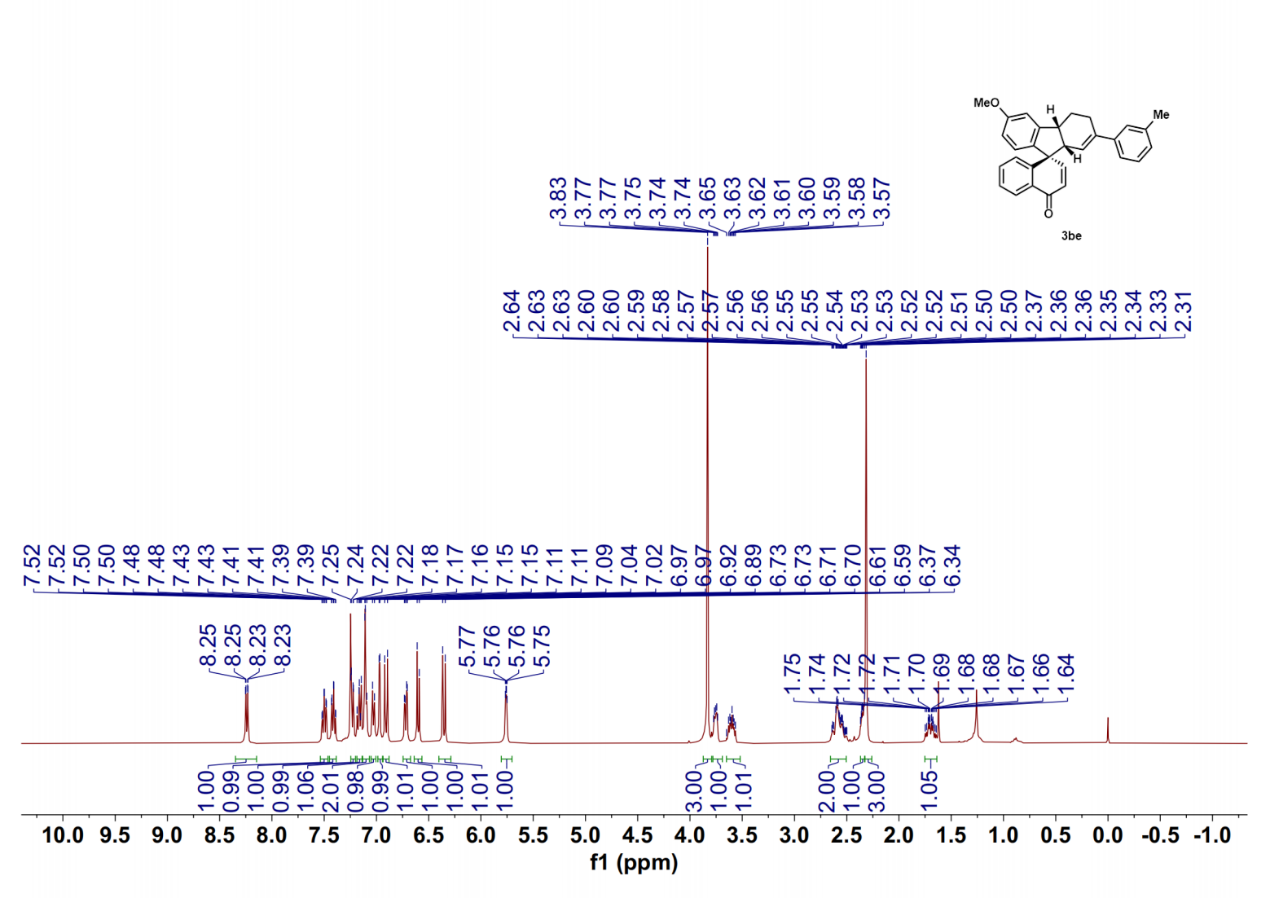

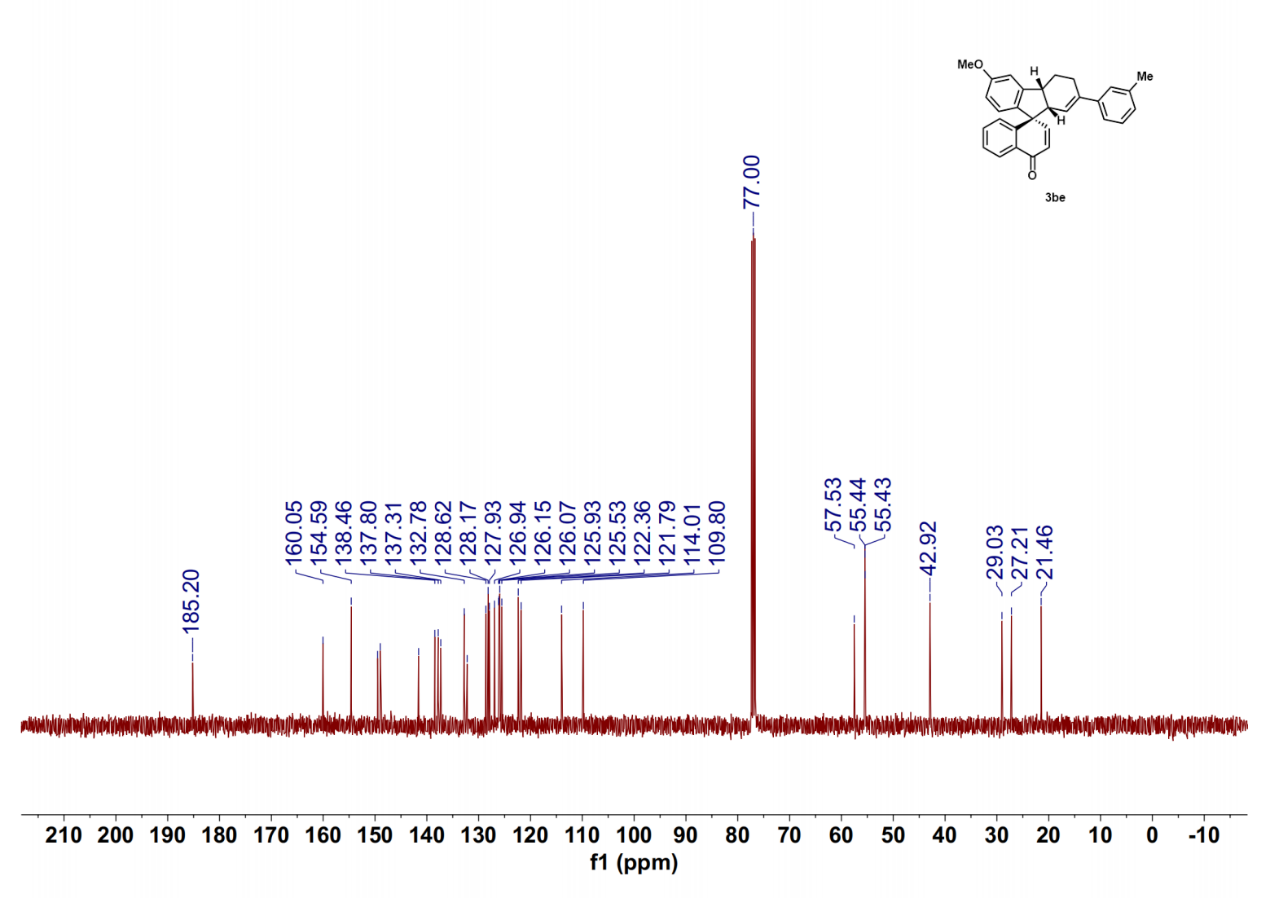

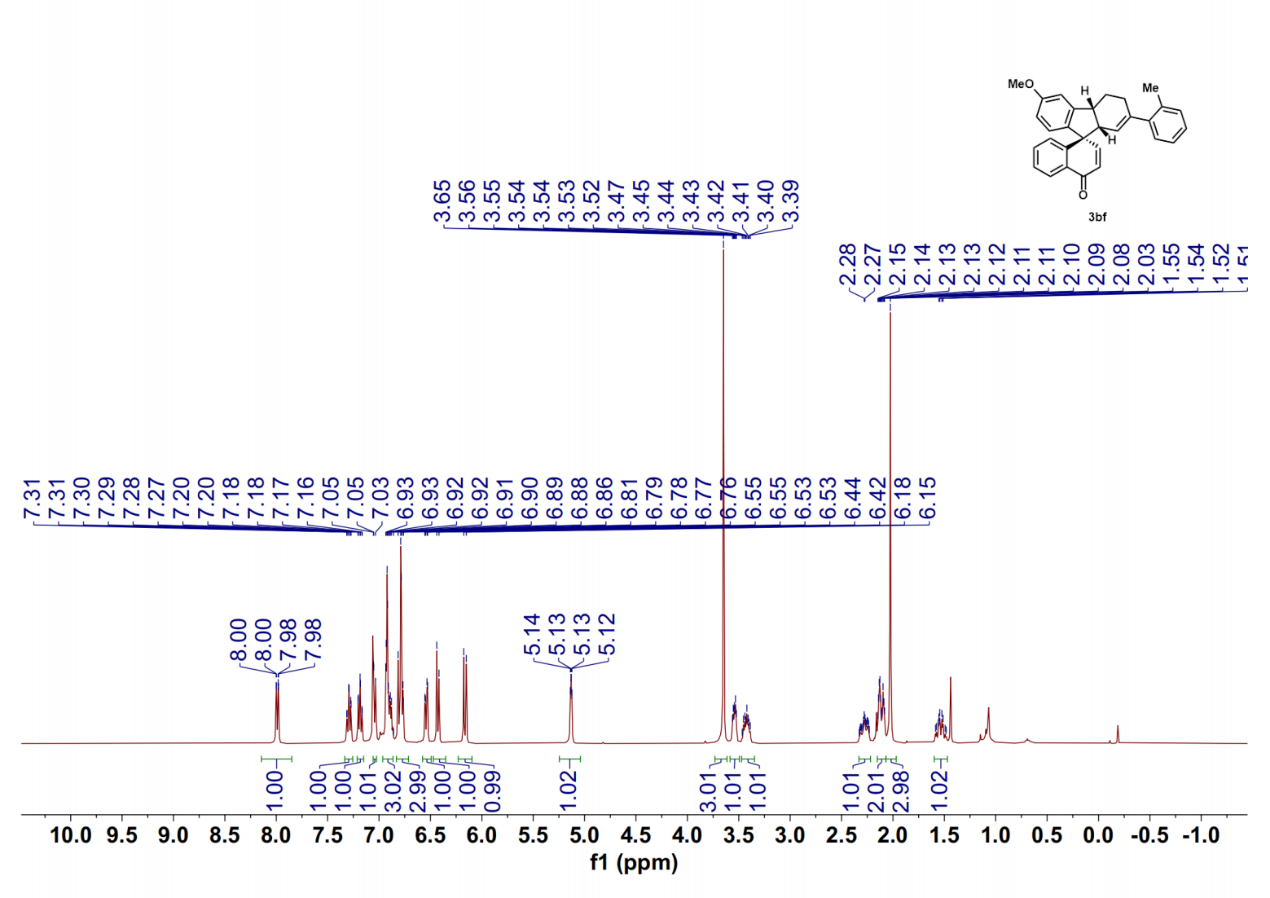

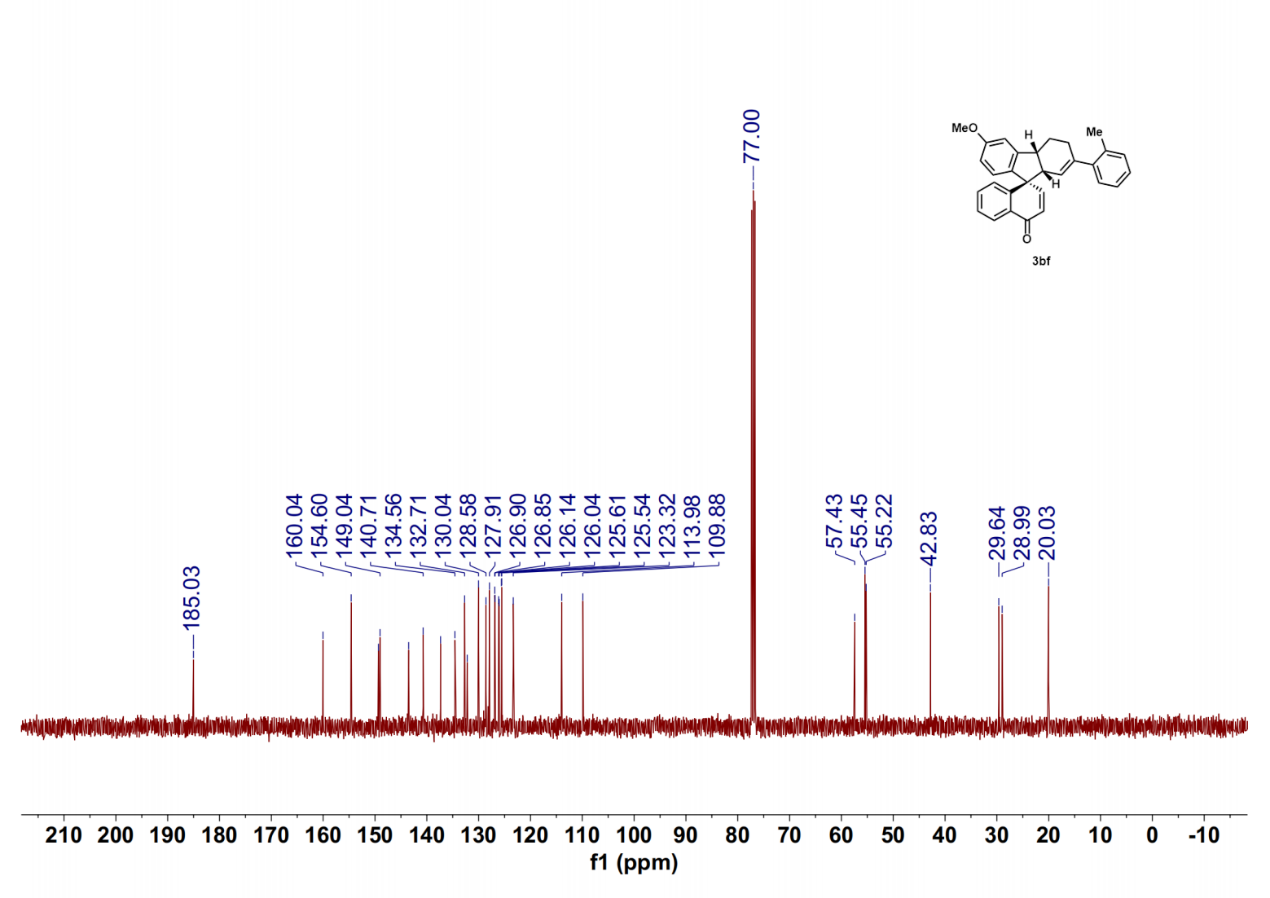

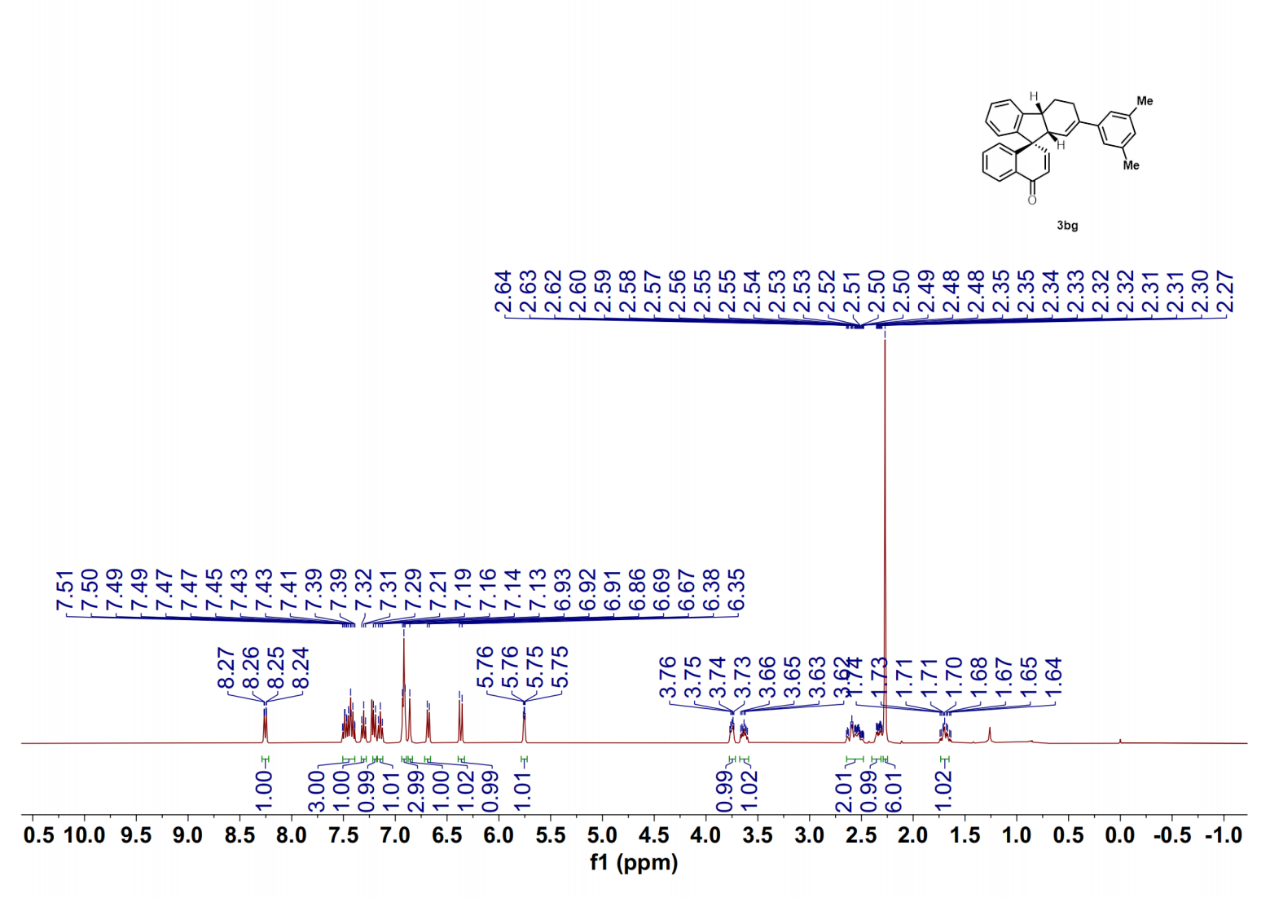

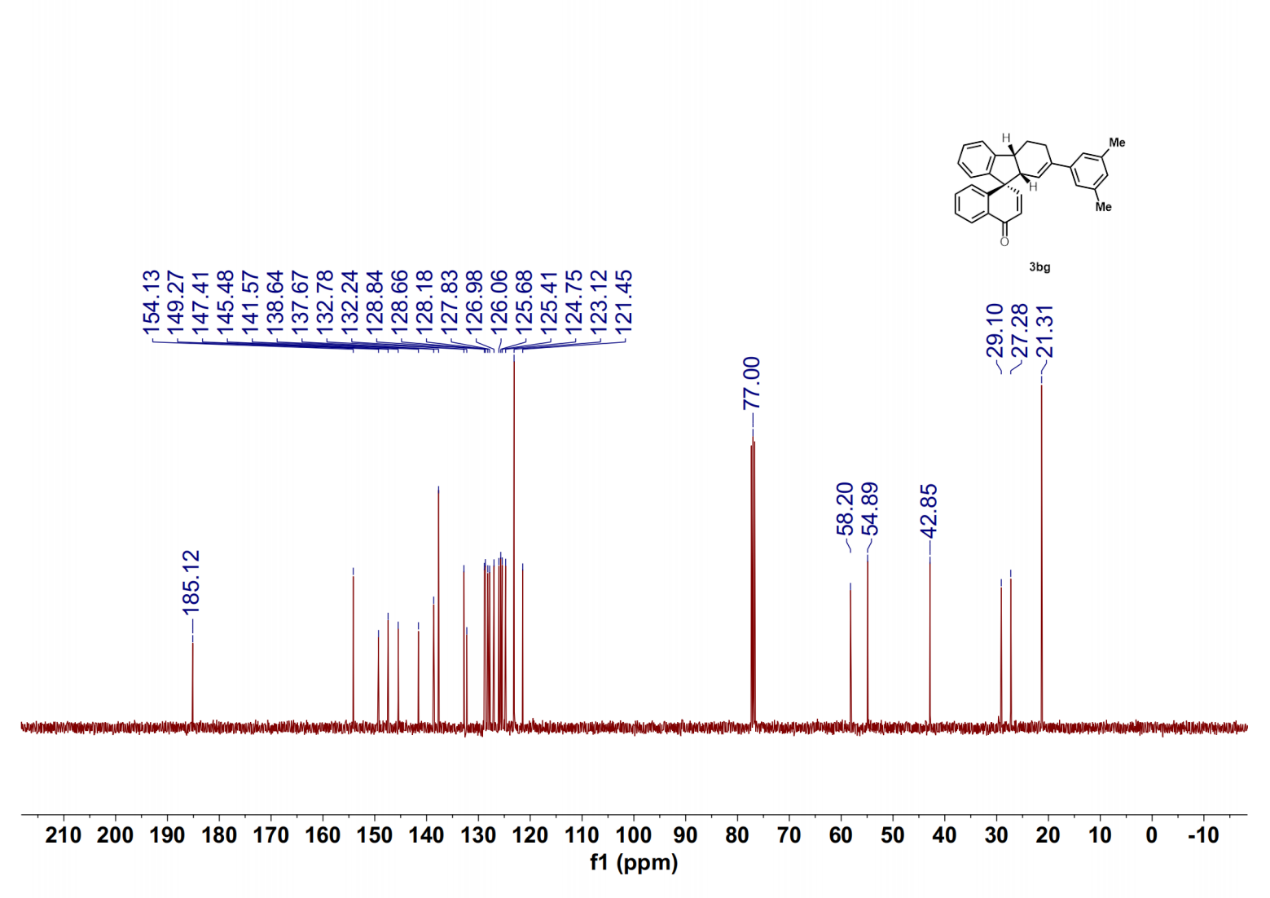

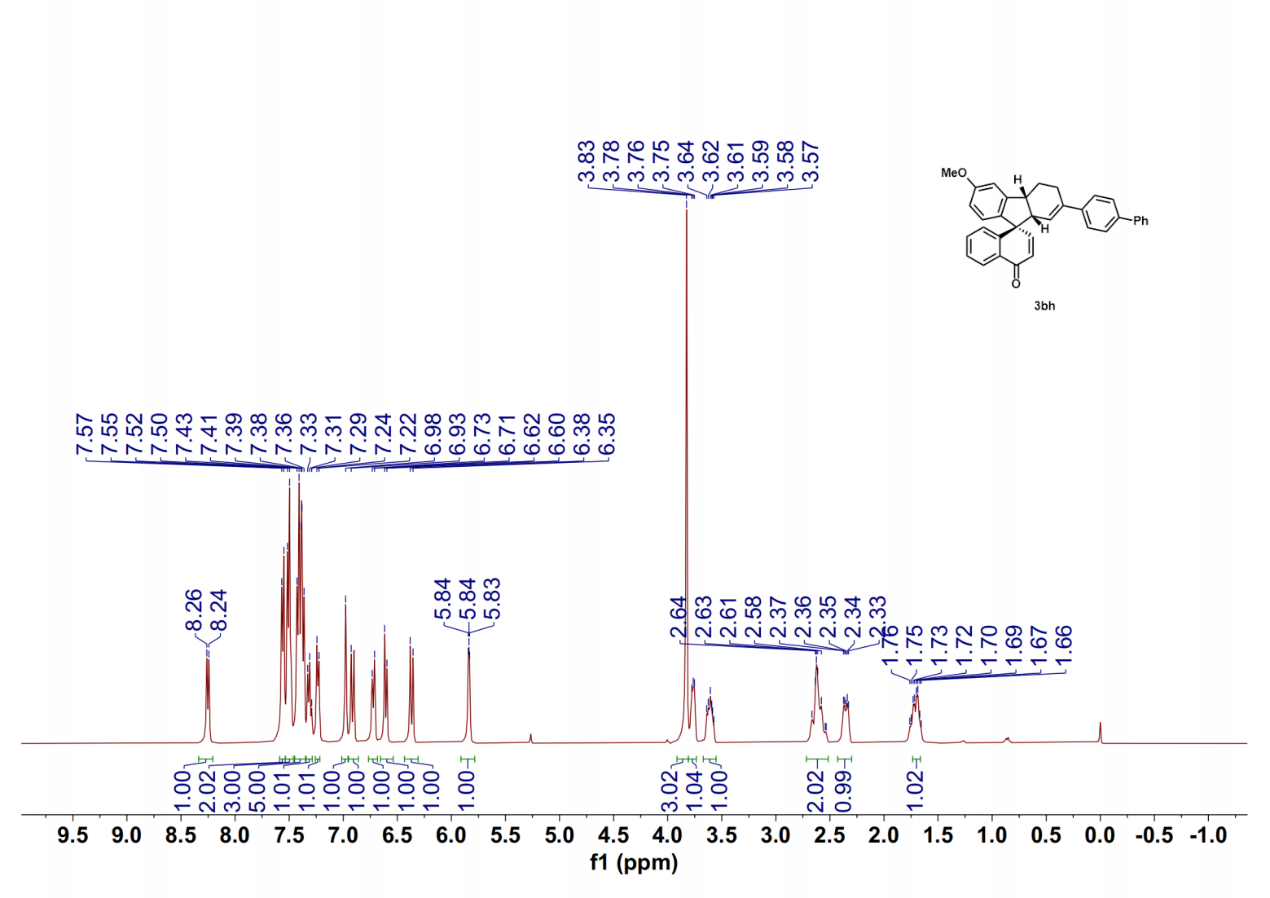

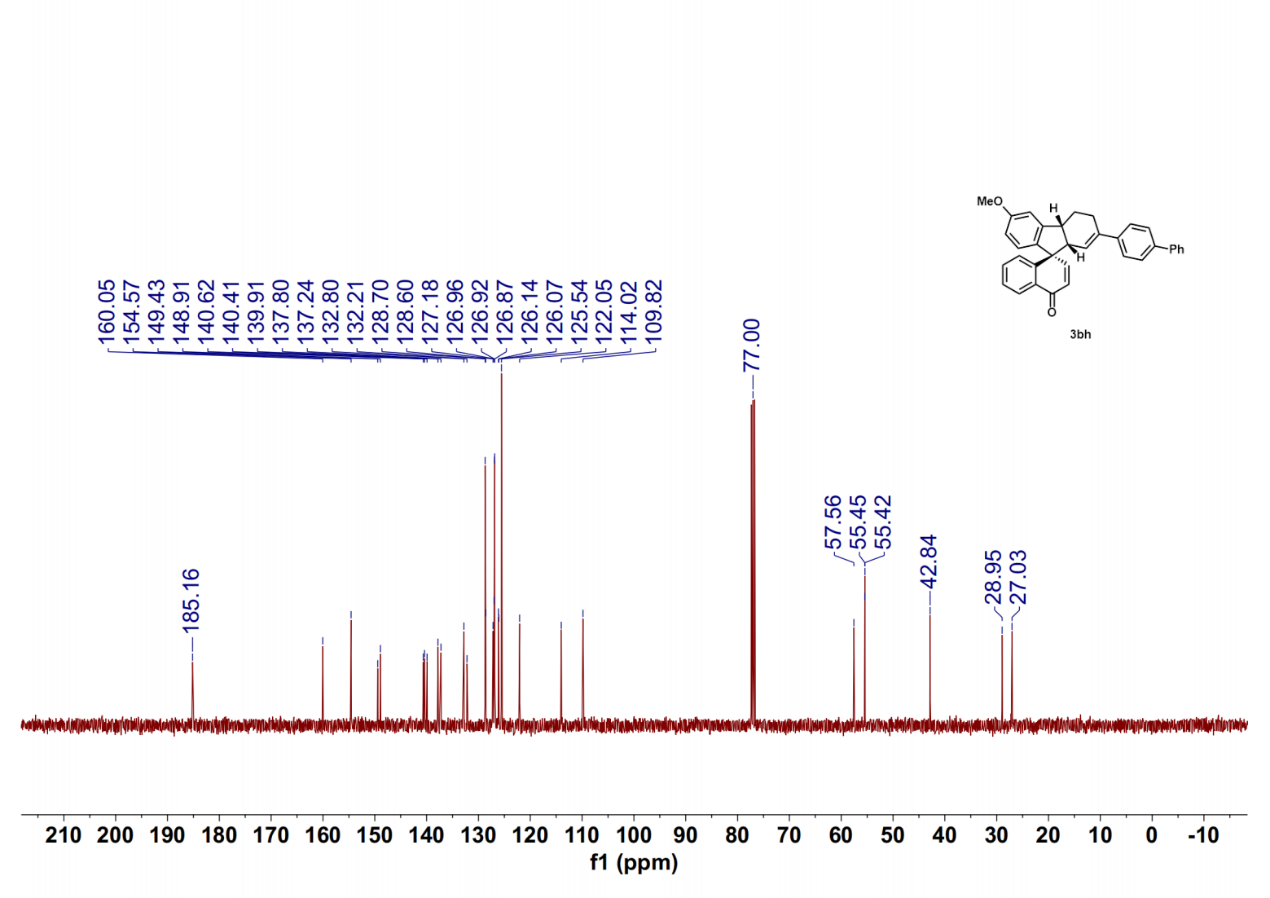


1. References.

(1) Zhang, W.; Zhang, P.-C.; Li, Y.-L.; Wu, H.-H.; Zhang, J. PC-Phos Enabled Catalytic Palladium-heteroallyl Asymmetric Cycloaddition. *J. Am. Chem. Soc.* **2022**, *144*, 19627–19634.

(2) Yang, L.; Zheng, H.; Luo, L.; Nan, J.; Liu, J.; Wang, Y.; Luan, X. Palladium-Catalyzed Dynamic Kinetic Asymmetric Transformation of Racemic Biaryls: Axial-to-Central Chirality Transfer. *J. Am. Chem. Soc.* **2015**, *137*, 4876–4879.

(3) Li, Y.-L.; Zhang, P.-C.; Wu, H.-H.; Zhang, J. Palladium-Catalyzed Asymmetric Tandem Denitrogenative Heck/Tsuji–Trost of Benzotriazoles with 1,3-Dienes. *J. Am. Chem. Soc.* **2021**, *143*, 13010–13015.

(4) Trost, B. M.; Huang, Z.; Murhade, G. M. Catalytic palladium-oxyallyl cycloaddition. *Science* **2018**, *362*, 564–568.

(5) Fan, L.; Liu, J.; Bai, L.; Wang, Y.; Luan, X. Rapid Assembly of Diversely Functionalized Spiroindenes by a Three-Component Palladium-Catalyzed C−H Amination/Phenol Dearomatization Domino Reaction. *Angew. Chem. Int. Ed.* **2017**, *56*, 14257–14261.

(6) Wang, D.-M.; Shan, H.-M.; She, L.-Q.; He, Y.-Q.; Wu, Y.; Tang, Y.; Xu, L.-P.; Wang, P. Ligand-enabled Ni-catalysed dicarbofunctionalisation of alkenes with diverse native functional groups. *Nat. Commun.* **2024**, *15*, 10333.

(7) Schrader, M. L.; Schäfer, F. R.; Schäfers, F.; Glorius, F. Bridging the information gap in organic chemical reactions. *Nat. Chem.* **2024**, *16*, 491–498.
